# Supplementary material for: Systems Biology Reveals NR2F6 and TGFB1 as Key Regulators of Feed Efficiency in Beef Cattle
Source: Front Genet. 2019 Mar 22;10:230. doi: 10.3389/fgene.2019.00230 (PMC6439317; doi:10.3389/fgene.2019.00230)
Supplement: Supplementary file 3 [file Table_3.XLSX]

## Sheet: A
Supplementary Table 3. Genes selected for network construction for being differentially expressed between high and low feed efficiency.
Gene ID	Gene Name	Tissue of DE			A - Adrenal gland
ENSBTAG00000013210	ADAMTS4	A			H - Hypothalamus
ENSBTAG00000014955	AMH	A			L - Liver
ENSBTAG00000010551	ATP1A2	A			M - Muscle
ENSBTAG00000007175	AVPR1A	A			P - Pituitary
ENSBTAG00000009493	BCL3	A
ENSBTAG00000017642	BMP3	A
ENSBTAG00000046529	bta-mir-4657	A
ENSBTAG00000023776	C11H9orf116	A
ENSBTAG00000044004	C9orf84	A
ENSBTAG00000017733	CA2	A
ENSBTAG00000008723	CCBE1	A
ENSBTAG00000010161	CCL21	A
ENSBTAG00000017442	CDO1	A
ENSBTAG00000019060	CLDN11	A
ENSBTAG00000010801	CMBL	A
ENSBTAG00000014335	CYP17A1	A
ENSBTAG00000015735	CYP4F2	A
ENSBTAG00000043550	cytb	A
ENSBTAG00000021211	DPT	A
ENSBTAG00000024058	EGR4	A
ENSBTAG00000010155	ENSBTAG00000010155	A
ENSBTAG00000020803	ENSBTAG00000020803	A
ENSBTAG00000023372	ENSBTAG00000023372	A
ENSBTAG00000024608	ENSBTAG00000024608	A
ENSBTAG00000034189	ENSBTAG00000034189	A
ENSBTAG00000045585	ENSBTAG00000045585	A
ENSBTAG00000046711	ENSBTAG00000046711	A
ENSBTAG00000048058	ENSBTAG00000048058	A
ENSBTAG00000008462	FAM43A	A
ENSBTAG00000006820	FATE1	A
ENSBTAG00000020191	FEV	A
ENSBTAG00000002107	FZD1	A
ENSBTAG00000012504	GAS2L1	A
ENSBTAG00000021658	GRASP	A
ENSBTAG00000019291	GRB14	A
ENSBTAG00000006546	GSTA2	A
ENSBTAG00000032642	GSTA3	A
ENSBTAG00000037949	GSTA5	A
ENSBTAG00000017765	GSTM1	A
ENSBTAG00000025853	HOMER1	A
ENSBTAG00000002333	HOPX	A
ENSBTAG00000011358	IER3	A
ENSBTAG00000016566	ITGA9	A
ENSBTAG00000008656	KBTBD6	A
ENSBTAG00000004905	KRT19	A
ENSBTAG00000026111	LBH	A
ENSBTAG00000017033	LSR	A
ENSBTAG00000003172	MEIS2	A
ENSBTAG00000007678	MKX	A
ENSBTAG00000043559	MT-ND4L	A
ENSBTAG00000043558	ND1	A
ENSBTAG00000043571	ND2	A
ENSBTAG00000043577	ND4	A
ENSBTAG00000043563	ND5	A
ENSBTAG00000043546	ND6	A
ENSBTAG00000016285	NGB	A
ENSBTAG00000006709	NPPA	A
ENSBTAG00000008940	NPTX1	A
ENSBTAG00000004503	NPY	A
ENSBTAG00000009180	NRSN1	A
ENSBTAG00000020592	OTOS	A
ENSBTAG00000006752	PFKFB4	A
ENSBTAG00000037726	PLCD1	A
ENSBTAG00000047997	PRPS2	A
ENSBTAG00000009012	PTX3	A
ENSBTAG00000017624	RAB17	A
ENSBTAG00000005244	RASL11A	A
ENSBTAG00000020028	RBP1	A
ENSBTAG00000012234	RHBG	A
ENSBTAG00000020600	RHOD	A
ENSBTAG00000022396	Saa3	A
ENSBTAG00000024552	SHH	A
ENSBTAG00000018577	SLC7A1	A
ENSBTAG00000005108	SLIT2	A
ENSBTAG00000001983	SMAGP	A
ENSBTAG00000042545	snosnR61	A
ENSBTAG00000008441	SOCS3	A
ENSBTAG00000010389	STBD1	A
ENSBTAG00000011952	SULT1E1	A
ENSBTAG00000034693	SYT1	A
ENSBTAG00000001979	TAF7L	A
ENSBTAG00000031287	TMEM158	A
ENSBTAG00000012900	TMEM229B	A
ENSBTAG00000007698	TMEM59L	A
ENSBTAG00000006424	TNNI3	A
ENSBTAG00000003012	TRAF1	A
ENSBTAG00000001537	TSKU	A
ENSBTAG00000005630	VWA7	A
ENSBTAG00000019588	BLA-DQB	AH
ENSBTAG00000021672	RGS1	AH
ENSBTAG00000032057	ENSBTAG00000032057	AHLMP
ENSBTAG00000027962	ENSBTAG00000027962	AHM
ENSBTAG00000027075	ENSBTAG00000027075	AHMP
ENSBTAG00000037605	ENSBTAG00000037605	AHMP
ENSBTAG00000001595	MT1E	AHP
ENSBTAG00000031160	ENSBTAG00000031160	AL
ENSBTAG00000047529	ENSBTAG00000047529	AL
ENSBTAG00000048049	ENSBTAG00000048049	AL
ENSBTAG00000048135	ENSBTAG00000048135	AL
ENSBTAG00000038128	BOLA-DQA5	ALP
ENSBTAG00000029942	bta-mir-29c	AM
ENSBTAG00000000560	ENSBTAG00000000560	AMP
ENSBTAG00000031082	ENSBTAG00000031082	AMP
ENSBTAG00000002258	APOA1	AP
ENSBTAG00000043564	ATP8	AP
ENSBTAG00000032481	DAPL1	AP
ENSBTAG00000009656	ENSBTAG00000009656	AP
ENSBTAG00000002080	NOV	AP
ENSBTAG00000003650	NR4A2	AP
ENSBTAG00000001139	ACHE	H
ENSBTAG00000001735	ADAM11	H
ENSBTAG00000020650	ADCYAP1	H
ENSBTAG00000008103	ALDH1A1	H
ENSBTAG00000015978	ANXA1	H
ENSBTAG00000014100	BAIAP3	H
ENSBTAG00000020872	C5AR1	H
ENSBTAG00000045742	C5H12orf75	H
ENSBTAG00000001075	CALB2	H
ENSBTAG00000017458	CALCR	H
ENSBTAG00000014463	CAMK2D	H
ENSBTAG00000006069	CAPS	H
ENSBTAG00000047486	CARTPT	H
ENSBTAG00000011002	CCDC136	H
ENSBTAG00000011782	CHGB	H
ENSBTAG00000002252	CHRNA2	H
ENSBTAG00000021844	COCH	H
ENSBTAG00000013472	COL1A2	H
ENSBTAG00000012215	CPNE7	H
ENSBTAG00000018941	CPXM2	H
ENSBTAG00000012909	CRABP1	H
ENSBTAG00000008102	CRTAC1	H
ENSBTAG00000005933	CTNNBIP1	H
ENSBTAG00000048269	CTXN1	H
ENSBTAG00000020810	CYB561	H
ENSBTAG00000003895	CYBA	H
ENSBTAG00000014523	DIRAS2	H
ENSBTAG00000012182	DIRAS3	H
ENSBTAG00000010860	DRD2	H
ENSBTAG00000003569	DZIP1	H
ENSBTAG00000005299	EDNRB	H
ENSBTAG00000017448	EFEMP1	H
ENSBTAG00000010069	EGR1	H
ENSBTAG00000026369	ENC1	H
ENSBTAG00000004836	ENSBTAG00000004836	H
ENSBTAG00000010448	ENSBTAG00000010448	H
ENSBTAG00000023338	ENSBTAG00000023338	H
ENSBTAG00000025126	ENSBTAG00000025126	H
ENSBTAG00000038326	ENSBTAG00000038326	H
ENSBTAG00000046640	ENSBTAG00000046640	H
ENSBTAG00000046833	ENSBTAG00000046833	H
ENSBTAG00000046933	ENSBTAG00000046933	H
ENSBTAG00000047595	ENSBTAG00000047595	H
ENSBTAG00000015828	FKBP11	H
ENSBTAG00000047502	FKBP5	H
ENSBTAG00000004322	FOS	H
ENSBTAG00000013810	GABBR2	H
ENSBTAG00000003392	GABRA5	H
ENSBTAG00000005644	GALNT9	H
ENSBTAG00000035697	GNG12	H
ENSBTAG00000013071	GPR153	H
ENSBTAG00000043553	GPX3	H
ENSBTAG00000004607	GSG1L	H
ENSBTAG00000009911	HDC	H
ENSBTAG00000019172	IGSF21	H
ENSBTAG00000012046	JUNB	H
ENSBTAG00000015197	KLHDC8A	H
ENSBTAG00000001288	MAOB	H
ENSBTAG00000048005	MGC157368	H
ENSBTAG00000023659	MT2	H
ENSBTAG00000003741	NEURL1	H
ENSBTAG00000005018	NFAM1	H
ENSBTAG00000003212	NNAT	H
ENSBTAG00000000507	NR4A1	H
ENSBTAG00000009873	NRN1	H
ENSBTAG00000027387	NRSN2	H
ENSBTAG00000030247	NSMF	H
ENSBTAG00000010191	PAK1	H
ENSBTAG00000040512	PCP4L1	H
ENSBTAG00000007343	PDLIM7	H
ENSBTAG00000038093	PEG10	H
ENSBTAG00000004924	PENK	H
ENSBTAG00000002464	PLCH2	H
ENSBTAG00000013008	PMCH	H
ENSBTAG00000013550	PRKCG	H
ENSBTAG00000005958	PTK2B	H
ENSBTAG00000020257	PTPN5	H
ENSBTAG00000013923	QPCT	H
ENSBTAG00000005337	RAB3B	H
ENSBTAG00000004215	RARRES2	H
ENSBTAG00000004305	RGS16	H
ENSBTAG00000033721	RLBP1	H
ENSBTAG00000014494	RNASET2	H
ENSBTAG00000021588	SCG2	H
ENSBTAG00000003826	SCN1B	H
ENSBTAG00000011446	SEMA7A	H
ENSBTAG00000004739	SLC18A2	H
ENSBTAG00000043972	SLC24A2	H
ENSBTAG00000011882	SLC24A3	H
ENSBTAG00000003515	SNCG	H
ENSBTAG00000042134	SNORD14	H
ENSBTAG00000042837	snoU2_19	H
ENSBTAG00000017312	SST	H
ENSBTAG00000024560	STUM	H
ENSBTAG00000004218	SYNDIG1L	H
ENSBTAG00000047648	SYT2	H
ENSBTAG00000002522	SYT5	H
ENSBTAG00000015356	TAC1	H
ENSBTAG00000021807	TAC3	H
ENSBTAG00000015163	TM4SF1	H
ENSBTAG00000017187	TMEM255A	H
ENSBTAG00000010008	TTC12	H
ENSBTAG00000009868	VGF	H
ENSBTAG00000021215	VWA5A	H
ENSBTAG00000044068	VWC2	H
ENSBTAG00000014384	ZDHHC22	H
ENSBTAG00000008573	ZFP36	H
ENSBTAG00000017420	ZMAT4	H
ENSBTAG00000037899	DLK1	HLP
ENSBTAG00000020747	ASS1	HM
ENSBTAG00000047029	ENSBTAG00000047029	HM
ENSBTAG00000019159	PVALB	HM
ENSBTAG00000015711	BTG2	HMP
ENSBTAG00000035654	ENSBTAG00000035654	HMP
ENSBTAG00000021467	IGFBP6	HMP
ENSBTAG00000000088	ALCAM	HP
ENSBTAG00000038067	MT1A	HP
ENSBTAG00000046277	RGS4	HP
ENSBTAG00000048254	5S_rRNA	L
ENSBTAG00000017666	ABCC5	L
ENSBTAG00000037449	ACSM5	L
ENSBTAG00000004476	ADHFE1	L
ENSBTAG00000037509	AKR1C4	L
ENSBTAG00000005585	ANXA13	L
ENSBTAG00000001945	ARG2	L
ENSBTAG00000002255	BHMT	L
ENSBTAG00000029851	bta-mir-122	L
ENSBTAG00000016204	C1RL	L
ENSBTAG00000025257	CCL4	L
ENSBTAG00000012700	CD247	L
ENSBTAG00000047914	CDHR5	L
ENSBTAG00000018652	CXCL17	L
ENSBTAG00000037778	CXCL3	L
ENSBTAG00000018365	CYP2E1	L
ENSBTAG00000004799	DENND2A	L
ENSBTAG00000001219	ENSBTAG00000001219	L
ENSBTAG00000010907	ENSBTAG00000010907	L
ENSBTAG00000021368	ENSBTAG00000021368	L
ENSBTAG00000025260	ENSBTAG00000025260	L
ENSBTAG00000034323	ENSBTAG00000034323	L
ENSBTAG00000039237	ENSBTAG00000039237	L
ENSBTAG00000039321	ENSBTAG00000039321	L
ENSBTAG00000039928	ENSBTAG00000039928	L
ENSBTAG00000040409	ENSBTAG00000040409	L
ENSBTAG00000043729	ENSBTAG00000043729	L
ENSBTAG00000046076	ENSBTAG00000046076	L
ENSBTAG00000047121	ENSBTAG00000047121	L
ENSBTAG00000047700	ENSBTAG00000047700	L
ENSBTAG00000047816	ENSBTAG00000047816	L
ENSBTAG00000048013	ENSBTAG00000048013	L
ENSBTAG00000048210	ENSBTAG00000048210	L
ENSBTAG00000010632	FABP6	L
ENSBTAG00000015505	FADS2	L
ENSBTAG00000032617	FBXO44	L
ENSBTAG00000017531	FETUB	L
ENSBTAG00000011624	FGF21	L
ENSBTAG00000003329	FST	L
ENSBTAG00000009828	FXYD2	L
ENSBTAG00000020406	GPC3	L
ENSBTAG00000006472	GPR143	L
ENSBTAG00000016276	HAL	L
ENSBTAG00000000087	HSD17B12	L
ENSBTAG00000046768	IGFBP1	L
ENSBTAG00000006343	IL1R2	L
ENSBTAG00000018531	JCHAIN	L
ENSBTAG00000004015	KAT6A	L
ENSBTAG00000014533	KEL	L
ENSBTAG00000015593	KIAA0753	L
ENSBTAG00000030297	MGC137099	L
ENSBTAG00000012370	MGP	L
ENSBTAG00000010433	M-SAA3.2	L
ENSBTAG00000014848	NR0B2	L
ENSBTAG00000014315	PBLD	L
ENSBTAG00000015654	PON1	L
ENSBTAG00000010606	PPP1R3B	L
ENSBTAG00000015274	PRL	L
ENSBTAG00000015074	PTGDS	L
ENSBTAG00000002705	REC8	L
ENSBTAG00000018773	RND1	L
ENSBTAG00000003113	RNF125	L
ENSBTAG00000031814	SDS	L
ENSBTAG00000011423	SERPINI2	L
ENSBTAG00000020852	SLC16A11	L
ENSBTAG00000037738	SLC17A4	L
ENSBTAG00000011381	SLC30A3	L
ENSBTAG00000047510	SMIM6	L
ENSBTAG00000042482	SNORA17	L
ENSBTAG00000042354	SNORA3	L
ENSBTAG00000042475	SNORA63	L
ENSBTAG00000046050	SNORA73	L
ENSBTAG00000045792	SNORD39	L
ENSBTAG00000042180	SNORD47	L
ENSBTAG00000042936	SNORD96	L
ENSBTAG00000013980	SOD3	L
ENSBTAG00000016175	SPNS3	L
ENSBTAG00000007616	TMED6	L
ENSBTAG00000004459	TMEM45A	L
ENSBTAG00000048167	U4	L
ENSBTAG00000001851	ENSBTAG00000001851	LM
ENSBTAG00000011207	CNN1	LP
ENSBTAG00000032531	MUSTN1	LP
ENSBTAG00000005714	ACTC1	M
ENSBTAG00000021048	ADM	M
ENSBTAG00000046484	AIF1L	M
ENSBTAG00000002473	ANGPTL4	M
ENSBTAG00000011734	ANKRD1	M
ENSBTAG00000001305	ATP2B2	M
ENSBTAG00000020643	BARX2	M
ENSBTAG00000005250	BGN	M
ENSBTAG00000040302	bta-mir-1281	M
ENSBTAG00000045628	C15orf61	M
ENSBTAG00000021768	CCNG2	M
ENSBTAG00000008353	CDKN1A	M
ENSBTAG00000022622	CISH	M
ENSBTAG00000011869	CSRP3	M
ENSBTAG00000000524	CSTB	M
ENSBTAG00000011820	DAPK2	M
ENSBTAG00000016874	DNAJB1	M
ENSBTAG00000021777	DOC2G	M
ENSBTAG00000008539	ENHO	M
ENSBTAG00000001858	ENSBTAG00000001858	M
ENSBTAG00000003152	ENSBTAG00000003152	M
ENSBTAG00000015297	ENSBTAG00000015297	M
ENSBTAG00000025383	ENSBTAG00000025383	M
ENSBTAG00000031913	ENSBTAG00000031913	M
ENSBTAG00000034662	ENSBTAG00000034662	M
ENSBTAG00000037794	ENSBTAG00000037794	M
ENSBTAG00000039486	ENSBTAG00000039486	M
ENSBTAG00000039620	ENSBTAG00000039620	M
ENSBTAG00000044871	ENSBTAG00000044871	M
ENSBTAG00000046177	ENSBTAG00000046177	M
ENSBTAG00000047561	ENSBTAG00000047561	M
ENSBTAG00000011190	FLNA	M
ENSBTAG00000014912	FMOD	M
ENSBTAG00000023929	FOSL2	M
ENSBTAG00000040128	FZD4	M
ENSBTAG00000019107	GAS7	M
ENSBTAG00000012608	GDAP1	M
ENSBTAG00000015402	GREB1	M
ENSBTAG00000001063	HOXA4	M
ENSBTAG00000009238	HOXC6	M
ENSBTAG00000012149	HOXC8	M
ENSBTAG00000005606	HOXC9	M
ENSBTAG00000012036	HR	M
ENSBTAG00000008389	HTRA1	M
ENSBTAG00000009972	INHA	M
ENSBTAG00000016343	KCNIP2	M
ENSBTAG00000003919	KIAA0408	M
ENSBTAG00000001176	LRRN1	M
ENSBTAG00000011465	MYBPH	M
ENSBTAG00000018204	MYH1	M
ENSBTAG00000007090	MYH2	M
ENSBTAG00000012079	MYLK4	M
ENSBTAG00000002216	MYOD1	M
ENSBTAG00000006686	NPNT	M
ENSBTAG00000018016	NUPR1	M
ENSBTAG00000047752	OTUD1	M
ENSBTAG00000008026	OXT	M
ENSBTAG00000011866	PCBD1	M
ENSBTAG00000015416	PEBP4	M
ENSBTAG00000008401	PFKFB3	M
ENSBTAG00000002092	PI16	M
ENSBTAG00000000396	PIM1	M
ENSBTAG00000004602	PITX1	M
ENSBTAG00000011667	PM20D2	M
ENSBTAG00000014831	PPP1R3C	M
ENSBTAG00000020520	RASD1	M
ENSBTAG00000025848	RBM3	M
ENSBTAG00000046189	RNASE13	M
ENSBTAG00000006121	SBK2	M
ENSBTAG00000014465	SERPINE1	M
ENSBTAG00000004034	SESN3	M
ENSBTAG00000011596	SFRS5	M
ENSBTAG00000011482	SLC43A2	M
ENSBTAG00000044812	snoU82P	M
ENSBTAG00000012120	TIPARP	M
ENSBTAG00000003935	TMBIM1	M
ENSBTAG00000016139	TMEM120A	M
ENSBTAG00000035995	TNFAIP2	M
ENSBTAG00000000328	TPPP2	M
ENSBTAG00000001748	TRIM45	M
ENSBTAG00000005085	TRIM63	M
ENSBTAG00000003692	UCP2	M
ENSBTAG00000046282	VGLL2	M
ENSBTAG00000014751	ZIC1	M
ENSBTAG00000046162	ZNF385C	M
ENSBTAG00000014614	ACTA2	MP
ENSBTAG00000000745	AQP1	MP
ENSBTAG00000006383	ENSBTAG00000006383	MP
ENSBTAG00000011677	HIST1H1C	MP
ENSBTAG00000007196	TAGLN	MP
ENSBTAG00000015441	ACTG2	P
ENSBTAG00000006991	ADH6	P
ENSBTAG00000002025	AMIGO2	P
ENSBTAG00000008545	ATF3	P
ENSBTAG00000006156	BST1	P
ENSBTAG00000037735	C5AR2	P
ENSBTAG00000015214	CA3	P
ENSBTAG00000017869	CAV1	P
ENSBTAG00000033221	CCDC152	P
ENSBTAG00000040564	COX7C	P
ENSBTAG00000000434	CRYAB	P
ENSBTAG00000009842	CRYM	P
ENSBTAG00000006367	CTGF	P
ENSBTAG00000009844	CYR61	P
ENSBTAG00000047043	DCXR	P
ENSBTAG00000005353	DES	P
ENSBTAG00000009996	DOT1L	P
ENSBTAG00000015238	DSC3	P
ENSBTAG00000030757	ELFN1	P
ENSBTAG00000003352	ENSBTAG00000003352	P
ENSBTAG00000005146	ENSBTAG00000005146	P
ENSBTAG00000020564	ENSBTAG00000020564	P
ENSBTAG00000031785	ENSBTAG00000031785	P
ENSBTAG00000031834	ENSBTAG00000031834	P
ENSBTAG00000039236	ENSBTAG00000039236	P
ENSBTAG00000043706	ENSBTAG00000043706	P
ENSBTAG00000007990	EPYC	P
ENSBTAG00000001097	FKBP7	P
ENSBTAG00000008300	FN1	P
ENSBTAG00000010889	FSHB	P
ENSBTAG00000025462	GADD45B	P
ENSBTAG00000046803	GAS1	P
ENSBTAG00000039151	HTR1F	P
ENSBTAG00000018349	IFI30	P
ENSBTAG00000003994	IGFBP3	P
ENSBTAG00000020904	JAK3	P
ENSBTAG00000030483	KLK7	P
ENSBTAG00000001043	LUZP2	P
ENSBTAG00000047795	MIR3618	P
ENSBTAG00000015988	MYH11	P
ENSBTAG00000005626	NEUROD4	P
ENSBTAG00000011338	NREP	P
ENSBTAG00000017655	PALMD	P
ENSBTAG00000020528	PCOLCE	P
ENSBTAG00000008687	PCSK2	P
ENSBTAG00000008433	PGAP2	P
ENSBTAG00000013688	PGF	P
ENSBTAG00000009432	PMF1	P
ENSBTAG00000045567	PRR15	P
ENSBTAG00000011027	PTGR1	P
ENSBTAG00000024453	RD3	P
ENSBTAG00000019203	S100A4	P
ENSBTAG00000040070	SCGB1D	P
ENSBTAG00000022109	SCOC	P
ENSBTAG00000018563	SFRP2	P
ENSBTAG00000046649	SGPP2	P
ENSBTAG00000009190	SLC2A4	P
ENSBTAG00000047865	SNORD107	P
ENSBTAG00000044183	SPINK7	P
ENSBTAG00000005260	SPP1	P
ENSBTAG00000007490	SULF2	P
ENSBTAG00000002952	TBX19	P
ENSBTAG00000001527	TMEM213	P
ENSBTAG00000012082	TNFRSF12A	P
ENSBTAG00000015632	TNFRSF18	P
ENSBTAG00000011424	TPM2	P
ENSBTAG00000006295	TSHB	P
ENSBTAG00000028359	U3	P
ENSBTAG00000013400	VIP	P
ENSBTAG00000013928	WFDC2	P
ENSBTAG00000014758	WIF1	P

## Sheet: B
Supplementary Table 3. Genes selected for network construction for being close/harbouring SNPs previourly associated with feed efficiency.
Gene ID	Gene Name	associated SNP/SNP window/QTL Position (Chr_Mb)	Reference
ENSBTAG00000004038	ABAT	rs110477162-rs110037478	doi.org/10.1186/1471-2164-15-1004
ENSBTAG00000019294	ABCC9	rs133941615	doi:10.2527/jas.2010-3079
ENSBTAG00000031010	ACAD11	rs208270150	doi:10.2527/jas2012-6170
ENSBTAG00000013163	ADAM33	rs110754958	doi:10.2527/jas.2010-3079
ENSBTAG00000020928	ADPRHL1	12_91	doi.org/10.1186/s12864-017-3754-y
ENSBTAG00000007125	AFMID	rs134654442-rs110630064	doi.org/10.1186/1471-2164-15-1004
ENSBTAG00000018469	ALDH6A1	rs110164488-rs43652141	doi.org/10.1186/1471-2164-15-1004
ENSBTAG00000015251	ALG13	rs136257636, rs136805592, rs134594131, rs134010086, rs135234015, rs137373892, rs133030870, rs137118274, rs132717584, rs134892784, rs136325770, rs41600847	doi:10.2527/jas.2010-3079
ENSBTAG00000022288	AMMECR1	rs134446039, rs133672479, rs135597006, rs137482809, rs132843961, rs136900369, rs135993911, rs134684930, rs136204631, rs132641345, rs137642180, rs137060690, rs135371544, rs133447351, rs136742796, rs134868673, rs135687369, rs134237654, rs135917375, rs132853136, rs135433935	doi:10.2527/jas.2010-3079
ENSBTAG00000016221	AMOT	rs132823785, rs109660463	doi:10.2527/jas.2010-3079
ENSBTAG00000019052	ANK3	rs135591620, rs42137930	doi:10.2527/jas.2010-3079
ENSBTAG00000009725	AOX1	rs110994776	doi:10.2527/jas2012-6170
ENSBTAG00000018257	APIP	rs43705159	doi:10.2527/jas2012-6170
ENSBTAG00000015543	ARHGAP35	rs29009652	doi: 10.2527/jas.2008-1759
ENSBTAG00000046248	ARPC1B	rs110979351	doi:10.2527/jas.2010-3079
ENSBTAG00000000492	ASNSD1	rs17870910	doi:10.2527/jas2012-6170
ENSBTAG00000026283	ASPH	rs135998745, rs133804027, rs132658262, rs135278154, rs109947702, rs137575941, rs133899403, rs135696960	doi:10.2527/jas.2010-3079
ENSBTAG00000013724	ATG4A	rs133571783, rs136136658, rs133819495, rs137485120, rs135585568	doi:10.2527/jas.2010-3079
ENSBTAG00000035827	ATG7	rs43033612	doi:10.2527/jas.2010-3079
ENSBTAG00000015100	ATP6V0E1	rs134565601-rs43094976	doi.org/10.1186/1471-2164-15-1004
ENSBTAG00000003450	ATP6V1H	rs110282018, rs136945140	doi:10.2527/jas.2010-3079
ENSBTAG00000003848	ATRN	rs41692157	doi:10.2527/jas.2010-3079
ENSBTAG00000047339	BCOR	rs134999645	doi:10.2527/jas.2010-3079
ENSBTAG00000019177	BIN1	rs210348685	doi:10.2527/jas2012-6170
ENSBTAG00000013573	BIRC5	rs134654442-rs110630064	doi.org/10.1186/1471-2164-15-1004
ENSBTAG00000002021	BNIP1	rs134565601-rs43094976	doi.org/10.1186/1471-2164-15-1004
ENSBTAG00000036367	bta-mir-374b	rs133384461	doi:10.2527/jas.2010-3079
ENSBTAG00000029828	bta-mir-421	rs136535500, rs137277900	doi:10.2527/jas.2010-3079
ENSBTAG00000013858	C16orf72	rs137078861	doi.org/10.1186/1471-2164-15-1004
ENSBTAG00000017529	CA8	rs136372915, rs134056831	doi:10.2527/jas.2010-3079
ENSBTAG00000009835	CACNA1G	rs476872493, rs476872493, rs41914675	doi: 10.1186/1471-2156-15-14
ENSBTAG00000002297	CACNB4	rs110923778	doi:10.2527/jas.2010-3079
ENSBTAG00000009991	CANT1	rs134654442-rs110630064	doi.org/10.1186/1471-2164-15-1004
ENSBTAG00000000828	CAPN6	rs135897772, rs136253996, rs136965734, rs135036759, rs134362724, rs135895285, rs133058630, rs134397689, rs135551432	doi:10.2527/jas.2010-3079
ENSBTAG00000001441	CARHSP1	rs110477162-rs110037478	doi.org/10.1186/1471-2164-15-1004
ENSBTAG00000020136	CASK	rs135274000	doi:10.2527/jas.2010-3079
ENSBTAG00000000874	CAST	rs109727850, rs210072660	doi:10.2527/jas2012-6170
ENSBTAG00000008201	CCDC151	rs137435333	doi:10.2527/jas.2010-3079
ENSBTAG00000005236	CCKBR	rs42670353, rs42670351, rs42670353	doi: 10.2527/jas.2012-5756
ENSBTAG00000019971	CDC16
ENSBTAG00000034373	CDH13	rs43708449	doi: 10.2527/jas.2008-1759
ENSBTAG00000015815	CFP	rs135864164, rs135267605	doi:10.2527/jas.2010-3079
ENSBTAG00000033284	CHCHD7	rs136288032	doi:10.2527/jas.2010-3079
ENSBTAG00000021841	CHD7	rs41725907, rs41725928, rs41725876, rs110917255, rs135441806, rs110543448, rs132857324	doi:10.2527/jas.2010-3079
ENSBTAG00000004432	CHRDL1	rs137317554	doi:10.2527/jas.2010-3079
ENSBTAG00000005290	CLDN2	rs137541134	doi:10.2527/jas.2010-3079
ENSBTAG00000005208	CLEC16A	rs135786315, rs110356040	doi:10.2527/jas.2010-3079
ENSBTAG00000006493	CLP1	rs110524424-rs42781637	doi.org/10.1186/1471-2164-15-1004
ENSBTAG00000015361	CNTFR	rs109500421	doi.org/10.1186/1471-2156-14-94
ENSBTAG00000015374	COL22A1	rs110286242, rs109942031	doi:10.2527/jas.2010-3079
ENSBTAG00000014575	COL4A5	rs136565055, rs133924414, rs137452552, rs132758226, rs134105649, rs132922294, rs137647426, rs133441256, rs135016412, rs136532448, rs134281296, rs136074101, rs136876780, rs136661495, rs134350978, rs137226811, rs136261355, rs133533731, rs135423295, rs134735392, rs135826968	doi:10.2527/jas.2010-3079
ENSBTAG00000020331	COQ6	rs110164488-rs43652141	doi.org/10.1186/1471-2164-15-1004
ENSBTAG00000002020	CREBRF	rs134565601-rs43094976	doi.org/10.1186/1471-2164-15-1004
ENSBTAG00000000283	CSF1	rs43337501	doi:10.2527/jas.2010-3079
ENSBTAG00000002411	CTNND1	rs110524424-rs42781637	doi.org/10.1186/1471-2164-15-1004
ENSBTAG00000008571	CUX2	rs41840685	doi:10.2527/jas.2010-3079
ENSBTAG00000003871	CYP2B6	rs29010201	doi: 10.2527/jas.2012-6170
ENSBTAG00000005287	CYP7A1	rs110208967, rs110813517, rs134655842	doi:10.2527/jas.2010-3079
ENSBTAG00000006663	CYTH1	rs134654442-rs110630064	doi.org/10.1186/1471-2164-15-1004
ENSBTAG00000001600	DCUN1D4	rs137537535, rs135821866	doi:10.2527/jas.2010-3079
ENSBTAG00000019591	DCX	rs135440367, rs134112654, rs136550943, rs133972157, rs132819533, rs133392924, rs135658666	doi:10.2527/jas.2010-3079
ENSBTAG00000021569	DDB1	29_40	doi.org/10.1186/s12864-017-3754-y
ENSBTAG00000017240	DGKQ	rs133781068	doi:10.2527/jas.2010-3079
ENSBTAG00000020378	DLG1	1_72	doi.org/10.1186/s12864-017-3754-y
ENSBTAG00000011291	DLG3	rs133428298	doi:10.2527/jas.2010-3079
ENSBTAG00000015930	DNAL1	rs110164488-rs43652141	doi.org/10.1186/1471-2164-15-1004
ENSBTAG00000019877	DOCK7	rs43352487, rs43354713	doi:10.2527/jas.2010-3079
ENSBTAG00000018579	DOK1	rs136509819	doi:10.2527/jas.2010-3079
ENSBTAG00000013863	DUSP1	rs134565601-rs43094976	doi.org/10.1186/1471-2164-15-1004
ENSBTAG00000048286	E2F6	rs109056119	doi:10.2527/jas.2010-3079
ENSBTAG00000030189	EFCAB6	rs109767303	doi:10.2527/jas.2010-3079
ENSBTAG00000015801	EFNB1	rs136970910, rs135076539	doi:10.2527/jas.2010-3079
ENSBTAG00000009272	ELMSAN1	rs110164488-rs43652141	doi.org/10.1186/1471-2164-15-1004
ENSBTAG00000002730	ELP3	ss914082889	doi.org/10.1186/1471-2156-15-14
ENSBTAG00000004586	ENSBTAG00000004586	rs135054094, rs135247788, rs133617607, rs136295502, rs133275726	doi:10.2527/jas.2010-3079
ENSBTAG00000006568	ENSBTAG00000006568	rs132867925, rs134489395, rs136346742	doi:10.2527/jas.2010-3079
ENSBTAG00000027930	ENSBTAG00000027930	rs109588316	doi:10.2527/jas.2010-3079
ENSBTAG00000043978	ENSBTAG00000043978	rs134495082, rs135761854, rs133927134	doi:10.2527/jas.2010-3079
ENSBTAG00000020334	ENTPD5	rs110164488-rs43652141	doi.org/10.1186/1471-2164-15-1004
ENSBTAG00000015955	ERGIC1	rs134565601-rs43094976	doi.org/10.1186/1471-2164-15-1004
ENSBTAG00000006209	EXT1	rs41729067, rs137149107	doi:10.2527/jas.2010-3079
ENSBTAG00000011933	FAM110B	rs136094790, rs133233546, rs135375329, rs136470858, rs134059462, rs135628340, rs133850201	doi:10.2527/jas.2010-3079
ENSBTAG00000020329	FAM161B	rs110164488-rs43652141	doi.org/10.1186/1471-2164-15-1004
ENSBTAG00000020194	FGF13	rs137847158, rs133943722, rs137431943	doi:10.2527/jas.2010-3079
ENSBTAG00000030669	FGGY	rs136831240	doi:10.2527/jas.2010-3079
ENSBTAG00000019376	FNDC3B	rs29025433	doi: 10.2527/jas.2008-1759
ENSBTAG00000007624	FRMD4B	rs109391253, rs135255685, rs110069607	doi:10.2527/jas.2010-3079
ENSBTAG00000012501	FTO	rs41579995-rs132921208	doi.org/10.1186/1471-2164-15-1004
ENSBTAG00000001335	GHR	rs209676814	doi:10.2527/jas2012-6170
ENSBTAG00000008708	GPC5	rs42456314	doi: 10.1186/1471-2156-14-94
ENSBTAG00000012512	GPR137	rs17872022	doi: 10.2527/jas.2008-1759
ENSBTAG00000003548	GSTP1	rs42188147, rs42188137	doi:10.2527/jas.2010-3079
ENSBTAG00000014917	GTPBP4	rs41692616	doi:10.2527/jas.2010-3079
ENSBTAG00000001740	HAPLN3	rs41974969	doi:10.2527/jas.2010-3079
ENSBTAG00000043948	HCN1	rs135423097	doi:10.2527/jas.2010-3079
ENSBTAG00000013244	HDAC6	rs135485043, rs132925720, rs133266566, rs137283221	doi:10.2527/jas.2010-3079
ENSBTAG00000046092	HDAC8	rs133081576	doi:10.2527/jas.2010-3079
ENSBTAG00000047416	HEPH	rs135384412, rs135851634, rs134011330, rs137396877, rs136823587	doi:10.2527/jas.2010-3079
ENSBTAG00000001303	HSPB8	17_58	doi.org/10.1186/s12864-017-3754-y
ENSBTAG00000001592	INSIG1	rs109314460	doi:10.2527/jas2012-6170
ENSBTAG00000012687	INSR	rs135580704	doi:10.2527/jas.2010-3079
ENSBTAG00000006535	IRS4	IRS4, IRS4, IRS4, IRS4	doi:10.2527/jas.2010-3079
ENSBTAG00000012083	IRX3	rs41579995-rs132921208	doi.org/10.1186/1471-2164-15-1004
ENSBTAG00000007553	KCNA5	rs110606723	doi:10.2527/jas.2010-3079
ENSBTAG00000021953	LARGE1	rs110562172	doi:10.2527/jas.2010-3079
ENSBTAG00000039435	LEMD3	rs110928880, rs109990184	doi:10.2527/jas.2010-3079
ENSBTAG00000001368	LGALS3BP	rs134654442-rs110630064	doi.org/10.1186/1471-2164-15-1004
ENSBTAG00000010423	LIFR	rs41943134	doi:10.2527/jas2012-6170
ENSBTAG00000030557	LIN52	rs110164488-rs43652141	doi.org/10.1186/1471-2164-15-1004
ENSBTAG00000005903	LRP5	rs42190891	doi:10.2527/jas2012-6170
ENSBTAG00000001043	LUZP2	29_20	doi.org/10.1186/s12864-017-3754-y
ENSBTAG00000020034	LYN	rs136857551, rs134853015, rs133191399, rs134435992, rs133846946, rs135328781, rs110367762, rs133921678, rs135626029, rs133142988, rs134735082, rs109116062, rs109110003, rs133409868, rs135388492, rs137365107	doi:10.2527/jas.2010-3079
ENSBTAG00000011292	LZTR1	rs134947035	doi:10.2527/jas.2010-3079
ENSBTAG00000016206	MAOA	rs135783747	doi:10.2527/jas.2010-3079
ENSBTAG00000001288	MAOB	rs135142781	doi:10.2527/jas.2010-3079
ENSBTAG00000000218	MAP2K5	rs109583198	doi:10.2527/jas.2010-3079
ENSBTAG00000002082	MARCKS	rs135458052	doi:10.2527/jas.2010-3079
ENSBTAG00000002389	MED19	rs110524424-rs42781637	doi.org/10.1186/1471-2164-15-1004
ENSBTAG00000035782	METTL22	rs110477162-rs110037478	doi.org/10.1186/1471-2164-15-1004
ENSBTAG00000018744	MGAT5	rs134624912	doi:10.2527/jas.2010-3079
ENSBTAG00000002843	MGC160092		doi:10.2527/jas.2010-3079
ENSBTAG00000021968	MID2	rs136506915, rs134019786	doi:10.2527/jas.2010-3079
ENSBTAG00000021188	MRPL16	15_84	doi.org/10.1186/s12864-017-3754-y
ENSBTAG00000003418	MSN	rs134503835, rs135539575	doi:10.2527/jas.2010-3079
ENSBTAG00000044017	MSRB3	rs110747857, rs110517550, rs109487001, rs134971547, rs135250416, rs133779723, rs134807171, rs135719341, rs133621233, rs135100839, rs137375806, rs133161027, rs134467465, rs109167433	doi:10.2527/jas.2010-3079
ENSBTAG00000011808	MSTN	2_3.6-3.9	doi: 10.2527/jas.2009-2025
ENSBTAG00000020126	MYO10	rs110293711	doi:10.2527/jas2012-6170
ENSBTAG00000012623	NDP	rs134836128	doi:10.2527/jas.2010-3079
ENSBTAG00000021976	NDUFS1	rs110249895	doi:10.2527/jas.2010-3079
ENSBTAG00000013282	NECAP2	rs43330759	doi:10.2527/jas2012-6170
ENSBTAG00000001429	NEURL1B	rs134565601-rs43094976	doi.org/10.1186/1471-2164-15-1004
ENSBTAG00000010362	NOSTRIN	rs43303701, rs43303697, rs109102855	doi:10.2527/jas.2010-3079
ENSBTAG00000009215	NR1I3	rs207913429	doi: 10.1016/j.mgene.2014.01.003
ENSBTAG00000011683	NUMB	rs110164488-rs43652141	doi.org/10.1186/1471-2164-15-1004
ENSBTAG00000020739	NXT2	rs136852036, rs134899746	doi:10.2527/jas.2010-3079
ENSBTAG00000000561	OCLN	rs109638814	doi:10.2527/jas2012-6170
ENSBTAG00000000914	OPRK1	rs41723198, rs135612754, rs41723154, rs110783689, rs41723206	doi:10.2527/jas.2010-3079
ENSBTAG00000033107	OSMR	rs41580312	doi:10.2527/jas2012-6170
ENSBTAG00000015670	PAK3	rs136523606, rs133824650, rs137412785, rs132646045, rs137036358, rs135234032, rs132832700, rs134075713, rs135371641, rs136608878, rs134561884, rs136097204, rs136810053, rs135721423, rs133049591, rs134922036, rs135810401, rs136774457, rs134170673, rs133432399, rs134781012	doi:10.2527/jas.2010-3079
ENSBTAG00000011680	PAPLN	rs110164488-rs43652141	doi.org/10.1186/1471-2164-15-1004
ENSBTAG00000016656	PARP14	rs43242284	doi:10.2527/jas2012-6170
ENSBTAG00000010672	PCCA	rs29012348	doi: 10.2527/jas.2008-1759
ENSBTAG00000017492	PCMTD1	rs136533736, rs137276129, rs135017851, rs42018420, rs42018418, rs42018417, rs136177708	doi:10.2527/jas.2010-3079
ENSBTAG00000006675	PCSK6	rs43020736	doi: 10.1093/jas/sky020
ENSBTAG00000045520	PDYN	rs137436315	doi:10.2527/jas.2010-3079
ENSBTAG00000004924	PENK	rs136198266, rs134428213, rs137492938, rs132881564	doi:10.2527/jas.2010-3079
ENSBTAG00000033190	PGM5	rs43550690	doi:10.2527/jas.2010-3079
ENSBTAG00000000675	PGS1	rs134654442-rs110630064	doi.org/10.1186/1471-2164-15-1004
ENSBTAG00000003321	PIH1D3	rs137820776, rs137260206	doi:10.2527/jas.2010-3079
ENSBTAG00000008150	PKIA	rs109845775-rs110706635	doi.org/10.1186/1471-2164-15-1004
ENSBTAG00000006974	PLEKHA7	rs133193054	doi:10.2527/jas2012-6170
ENSBTAG00000007830	PLEKHM3	rs110792452	doi:10.2527/jas.2010-3079
ENSBTAG00000003137	PLPPR1	rs43576719	doi:10.2527/jas.2010-3079
ENSBTAG00000011613	PLS3	rs134733252	doi:10.2527/jas.2010-3079
ENSBTAG00000001440	PMM2	rs110477162-rs110037478	doi.org/10.1186/1471-2164-15-1004
ENSBTAG00000009271	PNMA1	rs110164488-rs43652141	doi.org/10.1186/1471-2164-15-1004
ENSBTAG00000011857	PPM1H	rs135900313, rs133851660, rs132925593, rs136540824	doi:10.2527/jas.2010-3079
ENSBTAG00000021100	PPP1R3F	rs137380849, rs134824781	doi:10.2527/jas.2010-3079
ENSBTAG00000018404	PRKG1	rs29013727	doi: 10.2527/jas.2008-1759
ENSBTAG00000011757	PSEN1	rs110164488-rs43652141	doi.org/10.1186/1471-2164-15-1004
ENSBTAG00000013721	PSMD10	rs136593127	doi:10.2527/jas.2010-3079
ENSBTAG00000018425	PSMD7	rs110857287-rs43211307	doi.org/10.1186/1471-2164-15-1004
ENSBTAG00000020262	PSME4	rs132699343	doi:10.2527/jas.2010-3079
ENSBTAG00000016750	PTBP3	rs133763503, rs135366661, rs137440184, rs132632677, rs41665932	doi:10.2527/jas.2010-3079
ENSBTAG00000006716	PTGS1	rs109365529-rs132654030	doi.org/10.1186/s12863-014-0100-0
ENSBTAG00000031146	PYM1	rs134349849	doi:10.2527/jas.2010-3079
ENSBTAG00000003218	RAB28	6_113	doi.org/10.1186/s12864-017-3754-y
ENSBTAG00000004215	RARRES2	rs133399845	doi: 10.3389/fgene.2012.00039
ENSBTAG00000030259	RASGRF2	rs137263349	doi:10.2527/jas.2010-3079
ENSBTAG00000017452	RCAN3	rs135917191	doi:10.2527/jas.2010-3079
ENSBTAG00000019755	REEP3	rs29011694	doi: 10.2527/jas.2008-1759
ENSBTAG00000007137	RFC5		doi.org/10.1186/1471-2156-14-98
ENSBTAG00000008061	RILPL1	rs109990772, rs136173525, rs110088601	doi:10.2527/jas.2010-3079
ENSBTAG00000025372	RIOX1	rs110164488-rs43652141	doi.org/10.1186/1471-2164-15-1004
ENSBTAG00000044115	RIPPLY1	rs133194504	doi:10.2527/jas.2010-3079
ENSBTAG00000015630	RLIM	rs135927118	doi:10.2527/jas.2010-3079
ENSBTAG00000021699	RORB	rs110425920 rs109576993	doi:10.2527/jas.2010-3079
ENSBTAG00000012499	RPGRIP1L	rs41579995-rs132921208	doi.org/10.1186/1471-2164-15-1004
ENSBTAG00000015099	RPL26L1	rs134565601-rs43094976	doi.org/10.1186/1471-2164-15-1004
ENSBTAG00000019147	RPS20	rs134848602, rs133714277, rs137200131, rs136544328, rs134174250, rs135735870	doi:10.2527/jas.2010-3079
ENSBTAG00000002015	RPS6KA6	rs134521236, rs135695413	doi:10.2527/jas.2010-3079
ENSBTAG00000037650	RTL9	rs132858210, rs134446314, rs136127765, rs137569685	doi:10.2527/jas.2010-3079
ENSBTAG00000012621	RTN4RL2	rs110524424-rs42781637	doi.org/10.1186/1471-2164-15-1004
ENSBTAG00000016795	RUFY3	rs43710085, rs43710085	doi: 10.2527/jas.2008-1759
ENSBTAG00000021537	RWDD3	rs43339408, rs108950604	doi:10.2527/jas.2010-3079
ENSBTAG00000011374	S1PR3	rs132978116, rs133955758	doi:10.2527/jas.2010-3079
ENSBTAG00000019910	SDCBP	rs133036347	doi:10.2527/jas.2010-3079
ENSBTAG00000018570	SDR16C5	rs136629079	doi:10.2527/jas.2010-3079
ENSBTAG00000016267	SERPING1	rs110524424-rs42781637	doi.org/10.1186/1471-2164-15-1004
ENSBTAG00000011596	SFRS5	rs136348800	doi:10.2527/jas.2010-3079
ENSBTAG00000009019	SH3PXD2B	rs134565601-rs43094976	doi.org/10.1186/1471-2164-15-1004
ENSBTAG00000011375	SHC3	rs134576618, rs136623940, rs136370936, rs132943221, rs133251608, rs110589502, rs109733843, rs109444601, rs29021328	doi:10.2527/jas.2010-3079
ENSBTAG00000002996	SHROOM4	rs136085212	doi:10.2527/jas.2010-3079
ENSBTAG00000013167	SIGLEC1	rs41692200	doi:10.2527/jas.2010-3079
ENSBTAG00000002585	SLC16A2	rs133045867, rs136592512	doi:10.2527/jas.2010-3079
ENSBTAG00000021287	SLC16A7	rs137765025	doi:10.2527/jas.2010-3079
ENSBTAG00000043972	SLC24A2	rs134881264	doi:10.2527/jas.2010-3079
ENSBTAG00000007650	SLC38A11	rs41603982	doi:10.2527/jas.2010-3079
ENSBTAG00000018235	SLC45A2	rs41946086	doi:10.2527/jas2012-6170
ENSBTAG00000034991	SLX4IP	rs42580933, rs42580934	doi:10.2527/jas.2010-3079
ENSBTAG00000003843	SMARCAL1	rs109065702	doi:10.2527/jas2012-6170
ENSBTAG00000031383	SMIM24	rs135091971	doi:10.2527/jas.2010-3079
ENSBTAG00000027524	SMTNL1	rs110524424-rs42781637	doi.org/10.1186/1471-2164-15-1004
ENSBTAG00000002448	SNTG1	rs41720829	doi:10.2527/jas.2010-3079
ENSBTAG00000008441	SOCS3	rs134654442-rs110630064	doi.org/10.1186/1471-2164-15-1004
ENSBTAG00000014611	SORL1	rs41755948	doi: 10.1186/1471-2156-15-14
ENSBTAG00000008849	SORT1	rs137207486	doi:10.2527/jas.2010-3079
ENSBTAG00000021656	SPECC1L	rs133989446	doi:10.2527/jas.2010-3079
ENSBTAG00000046769	SPIN2B	rs135494226	doi:10.2527/jas.2010-3079
ENSBTAG00000047250	SPTSSB	rs43258874	doi:10.2527/jas.2010-3079
ENSBTAG00000005560	ST18	rs135835708, rs135649017, rs134368971, rs133996909, rs137131434	doi:10.2527/jas.2010-3079
ENSBTAG00000012820	STX3		doi:10.2527/jas.2010-3079
ENSBTAG00000004706	SUV39H1	rs136345364	doi:10.2527/jas.2010-3079
ENSBTAG00000019069	SYNGR2	rs134654442-rs110630064	doi.org/10.1186/1471-2164-15-1004
ENSBTAG00000000460	SYTL2	rs133904650	doi:10.2527/jas.2010-3079
ENSBTAG00000020580	TCN1	15_84	doi.org/10.1186/s12864-017-3754-y
ENSBTAG00000016272	TEX11	rs133187269, rs136224461	doi:10.2527/jas.2010-3079
ENSBTAG00000005898	TGS1	rs110334248, rs109490367, rs110321820, rs109783781, rs109003440, rs109172777, rs133640284, rs41627956	doi:10.2527/jas.2010-3079
ENSBTAG00000044055	THSD7B	rs42921606	doi:10.2527/jas.2010-3079
ENSBTAG00000010899	TIMP2	rs134654442-rs110630064	doi.org/10.1186/1471-2164-15-1004
ENSBTAG00000007121	TK1	rs134654442-rs110630064	doi.org/10.1186/1471-2164-15-1004
ENSBTAG00000018661	TMC6	rs134654442-rs110630064	doi.org/10.1186/1471-2164-15-1004
ENSBTAG00000019067	TMC8	rs134654442-rs110630064	doi.org/10.1186/1471-2164-15-1004
ENSBTAG00000026381	TMEM114	rs110477162-rs110037478	doi.org/10.1186/1471-2164-15-1004
ENSBTAG00000005482	TMEM135	rs135473419	doi:10.2527/jas.2010-3079
ENSBTAG00000037413	TMEM164	rs133690035, rs134075042, rs133081457, rs133049955, rs134418434, rs136778312, rs134529950, rs137706591, rs136464944, rs133891989, rs137514320, rs134085421, rs137670453, rs136495997, rs137704131, rs137281536, rs135913510, rs133608394, rs135299835, rs132911270, rs135059142, rs136550081, rs132856231	doi:10.2527/jas.2010-3079
ENSBTAG00000022530	TMEM186	rs110477162-rs110037478	doi.org/10.1186/1471-2164-15-1004
ENSBTAG00000016954	TMEM39B	rs110526611, rs110069568, rs111030471	doi:10.2527/jas.2010-3079
ENSBTAG00000000161	TMEM40	22_57	doi.org/10.1186/s12864-017-3754-y, doi.org/10.1186/1471-2156-14-95
ENSBTAG00000005893	TMEM68	rs135008823, rs109748092, rs132811556, rs108959399, rs110451945, rs109055951, rs134726969	doi:10.2527/jas.2010-3079
ENSBTAG00000002404	TMX2	rs110524424-rs42781637	doi.org/10.1186/1471-2164-15-1004
ENSBTAG00000025782	TNFSF8	rs136569649	doi:10.2527/jas.2010-3079
ENSBTAG00000018658	TNRC6C	rs134654442-rs110630064	doi.org/10.1186/1471-2164-15-1004
ENSBTAG00000004954	TOX	14_27, rs134817722, rs111001441	doi.org/10.1186/s12864-017-3754-y, doi:10.2527/jas.2010-3079
ENSBTAG00000010065	TRPC5	rs133472591, rs137319518, rs133124075, rs134860437, rs137725130, rs133970046, rs135871262, rs132832128, rs133974513, rs137120810, rs135687041, rs134405234, rs134577504, rs136895868, rs134989630, rs136519078, rs134095952, rs135658975, rs136585405, rs133975799, rs132818950, rs133761988, rs136144112, rs136898902, rs137825740, rs132729122, rs134391471, rs132939522, rs135480716, rs134791661, rs1362959…	doi:10.2527/jas.2010-3079
ENSBTAG00000012193	TTC28	rs41666538	doi:10.2527/jas.2010-3079
ENSBTAG00000023730	TUBB3	rs109535395-rs134508640	doi.org/10.1186/s12863-014-0100-0
ENSBTAG00000004495	UBA5	rs137393885	doi:10.2527/jas2012-6170
ENSBTAG00000018436	UBE2J1	rs137481263	doi:10.2527/jas.2010-3079
ENSBTAG00000012989	UBE2L6	rs110524424-rs42781637	doi.org/10.1186/1471-2164-15-1004
ENSBTAG00000020410	UFL1	rs135353096, rs134765347	doi:10.2527/jas.2010-3079
ENSBTAG00000026181	UGT1A6	rs42740055	doi:10.2527/jas.2010-3079
ENSBTAG00000013727	UMPS	rs110953962	doi:10.2527/jas2012-6170
ENSBTAG00000015415	UNC80	rs132658807	doi:10.2527/jas.2010-3079
ENSBTAG00000033603	UQCC2		doi:10.2527/jas.2010-3079
ENSBTAG00000039391	USP27X	rs136223974	doi:10.2527/jas.2010-3079
ENSBTAG00000021505	USP36	rs134654442-rs110630064	doi.org/10.1186/1471-2164-15-1004
ENSBTAG00000005455	USP7	rs110477162-rs110037478	doi.org/10.1186/1471-2164-15-1004
ENSBTAG00000016355	UVRAG	rs134847248	doi:10.2527/jas.2010-3079
ENSBTAG00000014737	VEGFC	rs109320233	doi:10.2527/jas.2010-3079
ENSBTAG00000012073	VOPP1	rs135434811	doi:10.2527/jas.2010-3079
ENSBTAG00000015769	VSIG4	rs135056601, rs133587883, rs135490206, rs132854983	doi:10.2527/jas.2010-3079
ENSBTAG00000018060	WDR13	rs132928593, rs137656488	doi:10.2527/jas.2010-3079
ENSBTAG00000014758	WIF1	rs110599566, rs110598689	doi:10.2527/jas.2010-3079
ENSBTAG00000018421	WWP2	rs110857287-rs43211307	doi.org/10.1186/1471-2164-15-1004
ENSBTAG00000017743	XIRP2	2_30	doi.org/10.1186/s12864-017-3754-y
ENSBTAG00000044050	XKR4	rs134312033, rs135396079, rs42649767, rs42649780, rs135958550, rs110543321, rs42646636, rs42646638, rs134408924, rs133469118, rs137558383, rs133535675, rs137302613, rs135638611, rs133153482, rs135646716, rs42646691, rs133409891, rs134655158, rs137339873, rs136200423, rs42646720, rs134188138, rs137495817, rs41724398, rs136792114, rs42646650, rs42646660, rs42646708, rs42649775	doi:10.2527/jas.2010-3079
ENSBTAG00000001977	YIPF6	rs135050719, rs136568127	doi:10.2527/jas.2010-3079
ENSBTAG00000016818	ZCCHC17	rs110822090	doi:10.2527/jas.2010-3079
ENSBTAG00000008047	ZDHHC15	rs137157352, rs132782452, rs135661793, rs137562372, rs136305699	doi:10.2527/jas.2010-3079
ENSBTAG00000002381	ZDHHC5	rs110524424-rs42781637	doi.org/10.1186/1471-2164-15-1004
ENSBTAG00000033268	ZFHX4	rs42509065-rs133984439	doi.org/10.1186/1471-2164-15-1004
ENSBTAG00000020327	ZNF410	rs110164488-rs43652141	doi.org/10.1186/1471-2164-15-1004
ENSBTAG00000017397	ZNF423	ss914082760	doi: 10.1186/1471-2156-15-14
ENSBTAG00000014415	ZNF653	rs137526826	doi:10.2527/jas.2010-3079
ENSBTAG00000002668	ZNF711	rs136672376	doi:10.2527/jas.2010-3079
ENSBTAG00000021224	ZSWIM6	rs134642272, rs133234743, rs41935831	doi:10.2527/jas.2010-3079

## Sheet: C
Supplementary Table 3. Genes selected for network construction for being tissue specific.
			Gene expression (mean log2 FPKM)
Gene ID	Gene Name	Tissue-specificity	HFE_A	HFE_H	HFE_L	HFE_M	HFE_P	LFE_A	LFE_H	LFE_L	LFE_M	LFE_P		A - Adrenal gland
ENSBTAG00000014335	CYP17A1	A	11.0083	0	0.111413	0.221957	0	11.4773	0.0981716	0.165729	0	0		H - Hypothalamus
ENSBTAG00000004508	DBH	A	9.03095	0.342711	0	0.0643632	0	9.18451	0.443652	0.100289	0	0		L - Liver
ENSBTAG00000001443	ENSBTAG00000001443	A	9.88404	0	0.144505	0.053984	0	10.1632	0.0781171	0.207118	0	0		M - Muscle
ENSBTAG00000001608	ENSBTAG00000001608	A	7.29248	0	0	0	0	7.33361	0	0	0	0		P - Pituitary
ENSBTAG00000004596	ENSBTAG00000004596	A	9.2915	0	0	0.00859721	0	9.61281	0	0	0	0		HFE - High feed efficiency
ENSBTAG00000037824	ENSBTAG00000037824	A	10.0013	0	0	0.0889154	0	10.3399	0.0605404	0	0	0		LFE - Low feed efficiency
ENSBTAG00000047039	ENSBTAG00000047039	A	9.57487	0	0	0.0944014	0	9.81762	0	0	0	0
ENSBTAG00000047901	ENSBTAG00000047901	A	5.94266	0.00845844	0	0	0	5.84775	0.144361	0	0	0.213748
ENSBTAG00000006036	ERP27	A	7.56836	0	0	0	0	7.3481	0	0	0	0
ENSBTAG00000037949	GSTA5	A	11.1141	0	0.716072	0.287844	0	12.1117	0.154879	0.327972	0	0
ENSBTAG00000012211	HOXA5	A	6.69049	0	0.010996	0.152101	0	6.90208	0	0.0827092	0.323445	0
ENSBTAG00000005685	HSD11B2	A	7.73611	0	0	0.118721	0	8.08517	0	0	0	0
ENSBTAG00000006769	HSD3B	A	11.8928	0	1.49951	0.358859	0	12.2697	0.258134	1.26182	0	0
ENSBTAG00000011038	MC2R	A	5.88524	0	0	0	0	5.96113	0	0	0	0
ENSBTAG00000002599	MGARP	A	7.18744	1.89129	0	1.01708	1.6522	7.09078	1.77798	0.0339918	1.29928	1.46165
ENSBTAG00000039384	MGC157237	A	6.31406	0.397053	0	0	0	5.76909	0.138445	0	0	0
ENSBTAG00000004503	NPY	A	6.92886	1.08571	0	0.0409173	0.0534644	8.27766	1.58883	0	0	0
ENSBTAG00000019168	PHOX2A	A	6.24927	0	0	0	0	5.97077	0	0	0	0
ENSBTAG00000011731	PNMT	A	12.3854	0	0.310841	1.37801	0	12.2875	0.336662	0.76773	0.828101	0.0506576
ENSBTAG00000046585	RTL1	A	6.8611	0.411514	0	0	0.0834563	6.79232	0.309593	0	0	0.168333
ENSBTAG00000033345	STAR	A	11.1377	0.413771	0.0376694	0.197713	0.051464	10.9794	0.431119	0.0464344	0	0.0168652
ENSBTAG00000026768	TH	A	9.95992	2.64983	0.33522	0.172673	0	10.3328	1.92636	0.255662	0	0
ENSBTAG00000015952	ADAP1	H	1.05596	6.55695	0	0.0930648	0.572312	0.858847	6.82653	0.0566124	0	0.434551
ENSBTAG00000014491	ATP6V1G2	H	0.952826	6.78355	0	0.0616772	0.522399	0.461332	6.82615	0	0	0.380268
ENSBTAG00000015789	BCAN	H	0.945514	7.36899	0	0	0	1.31396	7.37394	0	0	0
ENSBTAG00000000835	BCAS1	H	0.105311	9.20628	1.29097	0.131118	0	0	9.29972	1.57443	0.0395602	0
ENSBTAG00000001075	CALB2	H	1.0044	7.17535	0	0	0	0.377566	6.28426	0	0	0
ENSBTAG00000001228	CEND1	H	1.55623	6.72459	0	0	1.22671	1.25028	6.8717	0.0357564	0	1.17757
ENSBTAG00000032709	CMTM5	H	0.235571	6.44675	0	0	0	0.202447	6.55037	0	0	0
ENSBTAG00000011307	DNM1	H	1.97284	6.77401	0	0	0.193638	1.79752	6.83479	0	0	0.0394175
ENSBTAG00000043803	ENSBTAG00000043803	H	0	6.66629	0	0	0.38339	0	6.97278	0	0	0.0423507
ENSBTAG00000012912	ERMN	H	0	7.79814	0	0	0.656535	0	7.9814	0	0	1.04434
ENSBTAG00000009354	EVI2A	H	0.681118	6.34524	0.361732	0	0.14642	0.340947	6.6831	0.388489	0	0.151136
ENSBTAG00000033803	FABP7	H	1.6591	6.91027	0	0.376403	0.322137	1.50367	6.72782	0.065485	0	0.105891
ENSBTAG00000006451	GAP43	H	2.64934	7.70567	0	0	1.69357	1.98763	7.58242	0	0	1.4726
ENSBTAG00000013534	GFAP	H	1.03306	11.3903	0	0	0.619115	0.514284	11.0362	0	0	0.843911
ENSBTAG00000014992	GPR37L1	H	0.420501	7.03163	0	0	0.00110866	0.247815	7.004	0	0	0.00468459
ENSBTAG00000015784	HAPLN2	H	0	6.55042	0	0	0	0	6.82274	0	0	0
ENSBTAG00000002414	KCNJ10	H	0	6.27785	0	0	0	0	6.48687	0	0	0
ENSBTAG00000017044	MAG	H	0	8.02015	0	0	0	0	8.25204	0	0	0
ENSBTAG00000021626	MLC1	H	0	7.25509	0	0	0	0	7.20782	0	0	0
ENSBTAG00000009774	MOBP	H	0	9.32577	0	0	0	0	9.48004	0	0	0
ENSBTAG00000017818	MOG	H	1.29755	7.95919	0	0.0849623	0.42474	1.02241	8.17751	0	0.17686	0.426731
ENSBTAG00000000564	NSG2	H	2.66427	7.35073	0	0	1.86463	1.95353	6.9826	0	0	1.77301
ENSBTAG00000037547	OLIG1	H	0	6.59225	0	0	0	0	6.66571	0	0	0.0977298
ENSBTAG00000025213	OMG	H	1.3416	6.66923	0	0	0.290386	1.29877	6.82469	0	0	0.267077
ENSBTAG00000011740	OPALIN	H	0	6.67307	0	0	0	0	6.75521	0	0	0
ENSBTAG00000009434	PAQR6	H	1.78196	8.45079	0.114982	0.631831	0.879475	1.64442	8.44873	0	0.769841	0.963833
ENSBTAG00000006977	PLP1	H	1.98404	11.8187	0	0	1.32571	1.40703	12.0428	0	0	0.714879
ENSBTAG00000008945	SDSL	H	0.939143	6.88805	0.188881	0	0	1.81702	6.7421	0.0695308	0	0
ENSBTAG00000018245	SLC1A3	H	0	8.70889	0	0.682486	1.89206	0	8.36549	0	1.08718	1.37009
ENSBTAG00000017627	STMN4	H	2.58169	7.55787	0	0	0.684804	1.51127	7.83683	0	0	0.295635
ENSBTAG00000004574	UGT8	H	1.19601	6.50418	0	0	0	1.03248	6.68506	0	0	0
ENSBTAG00000017836	ZFP57	H	0.986321	7.09817	0	0.202296	0.7249	1.03056	7.3143	0	0.275097	0.55322
ENSBTAG00000009735	A1BG	L	0	0.0414613	10.3346	0	0	0	0	10.5027	0	0
ENSBTAG00000015191	ABCC6	L	0	0	5.3111	0	0	0	0	5.16761	0	0
ENSBTAG00000019423	ACSM2A	L	0	0	8.2541	0	0	0	0	8.02381	0	0
ENSBTAG00000006447	ACSM3	L	0.708153	0	5.7207	0	0	0.274171	0	5.47004	0	0
ENSBTAG00000034139	ADH4	L	0	0	8.94028	0	0	0	0	8.74706	0	0
ENSBTAG00000019533	ADTRP	L	0	0	6.23843	0.0254477	0	0	0	6.16176	0	0
ENSBTAG00000047833	AFM	L	0	0	5.9404	0	0	0	0	5.77539	0	0
ENSBTAG00000002478	AGMAT	L	0	0	7.0116	0.0501194	0	0	0	7.18187	0	0
ENSBTAG00000017294	agp	L	0	0.0803653	10.5647	0	0.0615372	0	0	10.8088	0	0
ENSBTAG00000005797	AGXT	L	0	0	7.11387	0	0	0.150107	0	7.24516	0	0
ENSBTAG00000007690	AGXT2	L	0	0	5.20148	0	0.141538	0	0	5.2676	0	0.53684
ENSBTAG00000022571	AKR1C3	L	0	0	9.88292	0.0860229	0	0	0	9.67439	0.0811028	0
ENSBTAG00000017121	ALB	L	0.106963	1.49552	14.3028	0.253278	0.544072	0.0977541	1.11849	13.9273	0	0.699486
ENSBTAG00000007975	ALDH8A1	L	0	0	5.28787	0	0	0	0	5.14603	0	0
ENSBTAG00000015676	AMBP	L	0	0.206888	12.7549	0.0225871	0.0747907	0	0.247389	12.9157	0	0
ENSBTAG00000021386	ANGPTL3	L	0	0	6.40435	0	0	0	0	6.61363	0	0
ENSBTAG00000009570	ANGPTL8	L	0	0.269998	5.96935	0.398466	0	0	0.0355208	6.33774	0	0
ENSBTAG00000005419	AOC1	L	0	0	5.44199	0.133018	0	0	0	5.35073	0	0
ENSBTAG00000019616	APCS	L	0	0	7.1102	0	0	0	0	6.65123	0	0
ENSBTAG00000009212	APOA2	L	0	0.615159	14.0977	0.038995	0.279431	0	0.290973	13.9601	0	0
ENSBTAG00000019770	APOA4	L	0.134677	0.244228	7.58671	0.126417	1.277	0	0.642747	8.04917	0	1.06837
ENSBTAG00000019764	APOA5	L	0	0	9.44589	0	0.099841	0	0	9.66464	0	0.00889442
ENSBTAG00000012398	APOC3	L	0	0.933237	13.2021	0.324563	0.408767	0	1.11967	13.117	0	0.396779
ENSBTAG00000020556	APOC4	L	0	0	10.2351	0	0	0	0	10.7323	0	0
ENSBTAG00000004384	APOF	L	0	0	6.86782	0	0	0	0	6.82753	0	0
ENSBTAG00000001915	APOH	L	0	0.181829	11.5351	0	0.026754	0	0.200813	11.8316	0	0
ENSBTAG00000008833	APOM	L	1.42662	1.17909	6.51964	0.253607	1.30654	0.938373	0.283376	6.48215	0.137811	0.888294
ENSBTAG00000045969	ApoN	L	0	0	7.84275	0	0	0	0	8.02675	0	0
ENSBTAG00000020184	AQP8	L	0	0	7.85531	0	0	0	0	8.0767	0	0
ENSBTAG00000013452	AQP9	L	0	0	5.18342	0	0	0.60443	0	5.03638	0	0
ENSBTAG00000012403	ARG1	L	0	0	6.55359	0	0	0	0	6.40296	0	0
ENSBTAG00000012071	ASGR1	L	0	0	7.96853	0	0	0	0	8.33734	0	0
ENSBTAG00000025101	ASGR2	L	0	0	9.20455	0	0	0	0	9.35521	0	0
ENSBTAG00000006840	ASPDH	L	0.0756567	0.971443	5.5858	0	0	0.0264366	1.30784	5.86682	0	0
ENSBTAG00000017194	ASPG	L	0	0	5.18979	0	0	0	0	5.51214	0	0
ENSBTAG00000020229	ATP8B3	L	0	0	5.10593	0	0	0	0	4.75709	0	0
ENSBTAG00000026236	AZGP1	L	0	0.0668997	7.5575	0	1.83598	0	0	7.63032	0	1.98216
ENSBTAG00000002255	BHMT	L	0	0	7.23415	0	0	0	0	8.21567	0	0
ENSBTAG00000031631	C1QTNF12	L	0.145639	0.901554	6.965	0	0	0.172938	0.891459	7.39957	0	0
ENSBTAG00000007450	C2	L	1.00946	0.650196	7.5671	0.0396061	2.01707	1.06737	0.0794972	7.21302	0	2.02237
ENSBTAG00000022246	C29H11orf86	L	0	0.0480067	7.83714	0.189511	0.0830718	0	0.250417	7.9479	0	0
ENSBTAG00000009876	C4BPA	L	0	0	7.99086	0	0	0	0	7.80392	0	0
ENSBTAG00000017714	C4BPB	L	0	0	6.65522	0	0	0	0	6.90536	0	0
ENSBTAG00000012210	C5	L	0.0971991	0	7.33643	0	0	0	0	7.39658	0	0
ENSBTAG00000014177	C6	L	0	0	7.20487	0	0	0	0.0969098	7.01387	0	0
ENSBTAG00000003774	C8A	L	0	0	8.83328	0	0	0	0	9.06767	0	0
ENSBTAG00000003775	C8B	L	0	0	7.43281	0	0	0	0	7.3365	0	0
ENSBTAG00000016149	C9	L	0	0	9.30442	0	0	0	0	9.1892	0	0
ENSBTAG00000022514	CD5L	L	1.33114	0	5.47193	0	0.116939	0.83286	0	5.37568	0	0
ENSBTAG00000011021	CES1	L	0	0.0948644	9.81618	0	0	0	0.00770104	9.70598	0	0
ENSBTAG00000040413	CES3	L	0	0	7.21539	0	0	0	0	7.05461	0	0
ENSBTAG00000006536	CGN1	L	0	0	10.5535	0	0	0	0	10.3963	0	0
ENSBTAG00000000259	CHIA	L	0	0	8.08762	0	0	0	0	8.1261	0	0
ENSBTAG00000002878	CHRD	L	0.247622	0	6.25149	0.567798	0.276182	0.444305	0.380904	6.46145	0.355228	0.246035
ENSBTAG00000008778	CHST13	L	0	0	5.10761	0	0	0	0	5.73729	0	0
ENSBTAG00000010236	CIDEB	L	0	0	7.27116	0.0735198	0	0	0.151748	7.2527	0	0
ENSBTAG00000007073	CPB2	L	0	0	7.42531	0	0	0	0	7.26105	0	0
ENSBTAG00000016662	CPS1	L	0	0	7.30627	0	0	0	0.0134591	7.31482	0	0
ENSBTAG00000010215	CREB3L3	L	0	0	6.24857	0	0	0	0.105897	6.40655	0	0
ENSBTAG00000013907	CRP	L	0	0	8.44117	0	0	0	0	8.40977	0	0
ENSBTAG00000037778	CXCL3	L	2.15061	2.23527	6.3352	0.655219	1.21338	2.08373	1.72905	5.68515	0.496551	0.720728
ENSBTAG00000000085	CYP1A2	L	0	0	8.4493	0	0	0	0	8.22295	0	0
ENSBTAG00000023549	CYP2C19	L	0	0	7.3237	0	0	0	0	6.81482	0	0
ENSBTAG00000018365	CYP2E1	L	0	0	7.0104	0	0	0	0	3.19942	0	0
ENSBTAG00000005450	CYP3A5	L	0	0	9.88104	0	0	0	0	9.56686	0	0
ENSBTAG00000037890	CYP4A11	L	0.330468	0	7.8965	0	0.188942	0.305635	0	8.13322	0	0.342963
ENSBTAG00000034106	CYP8B1	L	0	0.108297	7.89499	0	0	0	0	7.59684	0	0
ENSBTAG00000021887	DPYS	L	0	0	6.92076	0	0	0	0	6.89885	0	0
ENSBTAG00000000258	ENSBTAG00000000258	L	0	1.91162	9.19502	0	0	0	1.80533	9.05413	0	0
ENSBTAG00000003289	ENSBTAG00000003289	L	0.0718861	0	5.39417	0	0	0	0	5.36091	0	0
ENSBTAG00000007043	ENSBTAG00000007043	L	0	0	6.04216	0	0	0	0	6.30341	0	0
ENSBTAG00000008564	ENSBTAG00000008564	L	0	0	6.35953	0.0782454	0	0	0	6.77538	0.0396515	0
ENSBTAG00000012201	ENSBTAG00000012201	L	0	0	6.92061	0	0	0	0	6.53498	0	0
ENSBTAG00000014220	ENSBTAG00000014220	L	0	0	5.09336	0	0	0	0	5.27571	0	0
ENSBTAG00000015047	ENSBTAG00000015047	L	0	0	5.7911	0.215827	0	0	0.174137	5.59718	0	0
ENSBTAG00000015557	ENSBTAG00000015557	L	0	0	5.68207	0	0	0	0	5.55197	0	0
ENSBTAG00000017335	ENSBTAG00000017335	L	0.685264	0.0558013	7.8503	0	0.20429	0.482671	0.358921	7.99985	0	0.0921467
ENSBTAG00000020375	ENSBTAG00000020375	L	0	0	6.06378	0	0	0	0	5.8014	0	0
ENSBTAG00000022395	ENSBTAG00000022395	L	0	0	10.6987	0	0	0.0542607	0	10.6339	0	0
ENSBTAG00000022715	ENSBTAG00000022715	L	0.0175111	0.104862	5.10374	0.131476	0.579278	0	0.233072	5.84558	0	0
ENSBTAG00000023939	ENSBTAG00000023939	L	0	0	8.69782	0	0	0	0	8.60287	0	0
ENSBTAG00000024647	ENSBTAG00000024647	L	0.0386465	0	5.53409	0	0.484675	0.0229677	0	5.22534	0	0.50389
ENSBTAG00000024700	ENSBTAG00000024700	L	0	0	7.04333	0	0	0	0	7.65639	0	0
ENSBTAG00000026502	ENSBTAG00000026502	L	0.431808	0.0038949	5.90318	0.00631084	0	0.140393	0	5.37324	0	0
ENSBTAG00000030683	ENSBTAG00000030683	L	0	0.142274	10.905	0	0	0	0.0900596	10.5833	0	0
ENSBTAG00000030882	ENSBTAG00000030882	L	0.47767	0.323317	8.54444	0	0	0.431883	0.666337	8.70917	0	0.0782976
ENSBTAG00000032350	ENSBTAG00000032350	L	0	0	7.06147	0	0	0	0	7.29336	0	0
ENSBTAG00000037613	ENSBTAG00000037613	L	0	0	5.09548	0	0	0	0	4.98751	0	0
ENSBTAG00000038058	ENSBTAG00000038058	L	0	0	5.19685	0	0	0	0	5.46826	0	0
ENSBTAG00000038461	ENSBTAG00000038461	L	0	0	6.55562	0	0.0938474	0	0	6.63931	0	0
ENSBTAG00000038549	ENSBTAG00000038549	L	0	0	5.73092	0.122902	0	0	0.21912	5.64582	0	0
ENSBTAG00000039196	ENSBTAG00000039196	L	1.0171	0	4.9525	0.12346	0	0.295006	0	5.17991	0	0
ENSBTAG00000039362	ENSBTAG00000039362	L	0	0	5.07966	0	0	0	0	5.21545	0	0
ENSBTAG00000039643	ENSBTAG00000039643	L	0	0	7.2772	0	0	0	0	6.93854	0	0
ENSBTAG00000040337	ENSBTAG00000040337	L	0	0	7.56409	0	0	0	0	8.05104	0	0
ENSBTAG00000040409	ENSBTAG00000040409	L	0	0	7.17041	0	0	0	0	6.01433	0	0
ENSBTAG00000046975	ENSBTAG00000046975	L	1.81986	0	5.05296	0.0648046	0.0829728	1.22357	0	5.74561	0	0.0921898
ENSBTAG00000047317	ENSBTAG00000047317	L	0	0	7.01639	0	0	0	0	6.88994	0	0
ENSBTAG00000047621	ENSBTAG00000047621	L	1.88776	0	8.43447	0.675307	0	0.815845	0	8.38503	0.820763	0
ENSBTAG00000047815	ENSBTAG00000047815	L	0	0	8.93466	0	0.203453	0	0	8.58325	0	0.536963
ENSBTAG00000048094	ENSBTAG00000048094	L	0	0	9.15363	0	0	0	0	8.68471	0	0
ENSBTAG00000030246	ENTPD8	L	0	0	5.69559	0.157818	0	0	0.0670929	6.04227	0	0
ENSBTAG00000016385	F10	L	0.608875	1.5003	9.46161	0.072755	0	1.07011	2.20192	9.63183	0.197098	0
ENSBTAG00000003572	F11	L	0	0	5.84469	0	0	0	0	6.2371	0	0
ENSBTAG00000018872	F12	L	0	0	6.17443	0	0	0	0	6.48631	0	0
ENSBTAG00000000070	F13B	L	0	0	5.9008	0	0	0	0	5.2945	0	0
ENSBTAG00000007148	F2	L	0	0	9.91302	0	0	0	0.0195712	10.0617	0	0
ENSBTAG00000007411	F7	L	0	0	7.09818	0	0	0	0	7.20929	0	0
ENSBTAG00000004003	F9	L	0	0	7.76	0	0	0	0	7.75632	0	0
ENSBTAG00000018054	FABP1	L	0	1.12931	11.4397	0.087943	1.10526	0.0235371	0.643334	11.6028	0	0.216996
ENSBTAG00000017531	FETUB	L	0	0	7.55887	0	0	0	0	6.85225	0	0
ENSBTAG00000001638	FGA	L	0	0.294074	12.256	0.0973412	0.113738	0	0.207064	12.3976	0	0
ENSBTAG00000022120	FGB	L	0	0.173252	11.7551	0.104744	0.130376	0	0.216312	11.7952	0	0
ENSBTAG00000006745	FGG	L	0.854625	0.28159	11.4394	0.119489	0.0975604	0.0492431	0.240889	11.4231	0	0
ENSBTAG00000021408	FMO1	L	0	0	7.47664	0	0	0	0	7.13528	0	0.0579348
ENSBTAG00000020597	FMO3	L	0	0	7.11155	0	0	0	0	6.6442	0	0
ENSBTAG00000020404	FTCD	L	0	0	8.78605	0.0103812	0	0	0	9.23039	0	0
ENSBTAG00000010184	G6PC	L	0	0	6.60515	0	0	0	0	6.96379	0	0
ENSBTAG00000012540	GAT	L	0	0.0580467	6.01029	0	0	0	0.0490718	6.09056	0	0
ENSBTAG00000013718	GC	L	0	0.03534	11.0607	0	0	0	0.160963	10.8085	0	0
ENSBTAG00000003786	GCGR	L	0.0448126	0	7.46668	0.00666878	0	0	0.350047	7.87814	0	0
ENSBTAG00000038323	GLYAT	L	0	0	9.60491	0	0	0	0	9.51239	0	0
ENSBTAG00000010177	GOLT1A	L	0	0	6.44438	0.116389	0	0	0.150138	6.74007	0	0
ENSBTAG00000012854	GSDMB	L	0.11919	0.0255417	7.04333	0.441154	0.0568001	0	0.366319	7.15104	0	0.0242767
ENSBTAG00000008587	GSTT3	L	0.766061	2.17171	7.68864	0	1.51184	0.367828	2.20187	7.91742	0	1.26763
ENSBTAG00000026748	GULO	L	1.29653	0.1394	8.08477	0	0.0523957	1.39146	0.353326	8.2239	0	0.143063
ENSBTAG00000013333	GYS2	L	0	0	5.27001	0	0	0	0	5.75253	0	0
ENSBTAG00000004674	HAAO	L	0	0	8.69093	0	0	0	0	8.55805	0	0
ENSBTAG00000019322	HABP2	L	0	0	6.37056	0.201142	0	0	0	6.5118	0	0
ENSBTAG00000017042	HAMP	L	0	0	9.34904	0	0	0	0	9.36006	0	0
ENSBTAG00000000123	HAO2	L	0	0	6.47589	0	0	0.035407	0	6.56235	0	0
ENSBTAG00000015895	HGD	L	0	0	8.51961	0	0	0	0	8.65632	0	0
ENSBTAG00000003898	HMGCS2	L	0	0	8.90656	0	0.121554	0	0	9.10678	0	0
ENSBTAG00000004175	HPD	L	0.0859095	0	10.3336	0.698252	0.0490102	0	0	10.3937	0.645876	0.233118
ENSBTAG00000003564	HPX	L	0	0.270648	12.5715	0.056831	0.137742	0	0.226059	12.663	0	0
ENSBTAG00000001265	HRG	L	0	0	9.08711	0	0	0	0.0462378	8.78145	0	0
ENSBTAG00000031679	HSD17B13	L	0	0	6.80619	0	0	0	0	6.46585	0	0
ENSBTAG00000011720	HSD17B6	L	0.0057821	0	7.18052	0	0.0394111	0	0	6.69936	0	0.176512
ENSBTAG00000011082	IGF1	L	0	0	5.10979	0	0	0	0.0567777	5.28413	0	0
ENSBTAG00000033299	IGFALS	L	0	0	6.05307	0	0	0	0	6.33396	0	0
ENSBTAG00000046768	IGFBP1	L	0.938268	0	4.43181	0	0	0	0	6.36565	0	0
ENSBTAG00000001448	INMT	L	0	0	6.42519	0	0	0	0	7.10964	0	0
ENSBTAG00000007843	ITIH1	L	0	0	9.8986	0	0	0	0	9.93709	0	0
ENSBTAG00000014075	ITIH2	L	0	0	9.51645	0	0	0	0	9.66331	0	0
ENSBTAG00000007846	ITIH3	L	0.219294	0	8.14701	0	0	0.253656	0	8.41385	0	0
ENSBTAG00000009501	KLKB1	L	0	0	5.51108	0	0	0	0	5.59747	0	0
ENSBTAG00000005122	KNG1	L	0.0292673	0	9.65475	0	0	0	0	9.64681	0	0
ENSBTAG00000016864	LBP	L	0.72482	0	5.90334	0	0	0.814602	0	6.24833	0	0
ENSBTAG00000018926	LEAP2	L	0	0.0930623	8.6629	0.170466	0	0	0.116054	8.81302	0	0
ENSBTAG00000001247	LECT2	L	0	0.00607164	9.64499	0	0	0	0	9.78816	0	0
ENSBTAG00000005479	LIPC	L	0	0	7.46199	0	0	0	0	7.30966	0	0
ENSBTAG00000018473	MARCO	L	1.73381	0	6.32126	0	0.0174273	1.27144	0	6.80056	0	0
ENSBTAG00000012808	MASP2	L	0.438369	0.428433	6.32709	0	0.538381	0.256683	0.661025	6.22262	0	0.483338
ENSBTAG00000005963	MAT1A	L	0.115243	0.105895	7.21915	0	0.638533	0	0.0757233	7.56838	0	0.630003
ENSBTAG00000007049	MBL2	L	0	0	7.38779	0	0	0	0	7.3369	0	0
ENSBTAG00000012896	METTL7B	L	0	0	8.02422	1.13148	0	0	0	7.73073	1.10219	0
ENSBTAG00000026666	MGC137014	L	0	0.0592868	11.1942	0	0.117759	0	0.0833792	11.1918	0	0.0361499
ENSBTAG00000030297	MGC137099	L	0	0.0724547	9.57027	0.340041	0	0	0.534446	8.91679	0	0.0931739
ENSBTAG00000018556	MGC137211	L	0	0.0242757	9.57905	0	0	0	0.0715173	9.40753	0	0
ENSBTAG00000039647	MGC152010	L	0	0	7.00541	0	0	0	0	6.75988	0	0
ENSBTAG00000037856	MGC152281	L	0	0	5.46519	0.170953	0.0112878	0	0.12005	5.16533	0	0
ENSBTAG00000047520	MPV17L	L	0.288274	0.0305203	4.92411	0	0.0994348	0	0.202703	5.0861	0	0.0230788
ENSBTAG00000011585	MST1	L	2.33486	0.255655	7.58925	0.00894691	1.79342	2.4118	0.0211752	7.79244	0	1.67326
ENSBTAG00000019557	NR1I2	L	0	0	5.25473	0	0	0	0	5.38577	0	0
ENSBTAG00000009215	NR1I3	L	0	0.510779	5.89118	0	0	0	0.495774	5.90417	0	0
ENSBTAG00000044132	NTN5	L	0	0	4.87328	0	0	0	0	5.02165	0	0
ENSBTAG00000001488	OTC	L	0	0	7.26953	0	0	0	0	7.32807	0	0
ENSBTAG00000001936	PCK1	L	0	0.0627769	9.03845	0.126806	0.0015139	0	0	9.32539	0.0593938	0
ENSBTAG00000009350	PLA2G12B	L	0	0	4.99221	0.0781044	0	0	0.0104615	5.13391	0	0
ENSBTAG00000001271	PLG	L	0	0	8.94538	0	0	0	0	8.92684	0	0
ENSBTAG00000003950	PROC	L	0	0.0546858	8.69636	0	0	0	0	8.97804	0	0
ENSBTAG00000031772	PRODH2	L	0	0	5.33131	0	0	0	0	5.74333	0	0
ENSBTAG00000019440	PROZ	L	0	0.0137183	6.86366	0	0	0	0	7.00414	0	0
ENSBTAG00000008127	RBP5	L	0	0	7.76799	0	0	0	0	7.50268	0	0
ENSBTAG00000001392	RDH16	L	0	0	6.55975	0	0	0	0	6.78416	0	0
ENSBTAG00000022394	SAA1	L	0	0	11.7445	0	0	0	0	11.7019	0	0
ENSBTAG00000002963	SAA4	L	0	0	7.19206	0	0	0	0	6.8898	0	0
ENSBTAG00000001041	SAO	L	0	0	8.51569	0	0	0	0	8.42137	0	0
ENSBTAG00000018843	SERPINA1	L	0	0.337712	12.3428	0.0137447	1.66526	0	0.232886	12.3975	0	0.936596
ENSBTAG00000009894	SERPINA10	L	0	0	5.33089	0	0	0	0	5.41002	0	0
ENSBTAG00000038361	SERPINA11	L	0	0	7.49427	0	0	0	0	7.8222	0	0
ENSBTAG00000046540	SERPINA3-1	L	0.151011	0	11.0949	0	0.0123029	0.780781	0.0858809	11.2223	0	0
ENSBTAG00000047040	SERPINA3-3	L	0	0	8.48325	0	0	0	0	8.95877	0	0
ENSBTAG00000026917	SERPINA3-7	L	0	0	10.581	0	0	0	0.100988	10.5569	0	0
ENSBTAG00000007041	SERPINA3-8	L	0	0	7.58072	0	0	0	0	7.4859	0	0
ENSBTAG00000039808	SERPINA6	L	0	0	5.63278	0	0	0	0	5.02524	0	0
ENSBTAG00000047655	SERPINA7	L	0	0	6.5987	0	0	0	0	6.54764	0	0
ENSBTAG00000004362	SERPINC1	L	0	0	10.2614	0	0.00787743	0.0156903	0.00691357	10.1626	0	0
ENSBTAG00000013973	SERPIND1	L	0	0	10.6682	0	0	0	0	10.8295	0	0
ENSBTAG00000020859	SERPINF2	L	0	0	9.23747	0	0	0.0500131	0.0304777	9.38733	0	0
ENSBTAG00000023032	SFTPA1	L	0	0	6.58664	0	0	0	0	6.54451	0	0
ENSBTAG00000001881	SLC10A1	L	0	0	7.61827	0	0	0	0	7.5078	0	0
ENSBTAG00000002642	SLC17A2	L	0	0	5.06771	0	0	0	0	5.1022	0	0
ENSBTAG00000008540	SLC22A1	L	0	0	7.69689	0	0	0	0	7.6229	0	0
ENSBTAG00000012742	SLC22A18	L	0.380973	1.03322	6.66982	0.186171	0	0.187655	0.605004	7.02009	0	0
ENSBTAG00000006350	SLC22A7	L	0	0	6.39282	0	0	0	0	6.83591	0	0
ENSBTAG00000008384	SLC25A47	L	0.0873349	0	6.30933	0	0	0	0	7.00648	0	0
ENSBTAG00000015164	SLC27A5	L	1.13319	1.27701	7.58425	0.132163	1.89773	0.992914	1.13054	7.69174	0	1.79782
ENSBTAG00000002799	SLC39A5	L	0	0	6.65696	0.0597688	0	0	0	6.71216	0	0
ENSBTAG00000003737	SLC51B	L	0	0.174267	5.42205	0.507552	0.00275237	0	0.413631	4.89813	0	0.227336
ENSBTAG00000022329	SLCO1B3	L	0	0	6.52441	0	0	0	0	6.23983	0	0
ENSBTAG00000002030	SPP2	L	0	0.224848	11.6982	0.144951	0.0605977	0	0.0654593	11.6317	0.227997	0
ENSBTAG00000023419	SULT2A1	L	0	0	7.20404	0	0	0	0	6.96755	0	0
ENSBTAG00000002214	TAT	L	0	0.151923	6.32117	0	0.0381935	0	0.0917393	6.35528	0	0.174363
ENSBTAG00000021180	TBATA	L	0	0	4.77142	0	0	0	0	5.00169	0	0
ENSBTAG00000000011	TDH	L	1.41818	1.9883	6.41419	0	2.17662	1.08503	1.85184	6.67181	0	1.88076
ENSBTAG00000011062	TDO2	L	0	0	5.22099	0	0	0	0	5.02169	0	0
ENSBTAG00000011738	TFR2	L	0	0	6.24248	0	0	0	0.104407	6.46685	0	0
ENSBTAG00000003733	TM4SF5	L	1.2098	0.589424	7.35151	0	0.254127	1.22137	0.431387	7.33034	0	0.499141
ENSBTAG00000012189	TMEM86B	L	0	0	6.30434	0.174358	0	0	0.156318	6.14911	0	0
ENSBTAG00000032152	TMPRSS6	L	0	0	5.454	0	0.232602	0	0	5.72359	0	0.0623768
ENSBTAG00000026181	UGT1A6	L	0	0.0864944	7.7258	0.0655241	0.0242494	0	0.120821	7.74608	0	0
ENSBTAG00000001325	UPB1	L	0	0.139281	7.60864	0	0	0	0	8.00367	0	0
ENSBTAG00000013819	URAD	L	0	0	6.75072	0	0	0	0	7.08583	0	0
ENSBTAG00000016151	VTN	L	0	0.202459	12.3833	0	0.111993	0	0.201547	12.5614	0	0
ENSBTAG00000018352	ABRA	M	0	0.035569	0	5.13377	0	0	0.192664	0	5.04032	0
ENSBTAG00000046332	ACTA1	M	0.873958	0.223904	0	14.7808	0.235247	0.229363	1.80842	0	14.869	0.230416
ENSBTAG00000009696	ACTN2	M	1.59732	1.40193	0.0342217	10.6645	0	0.747292	0.856178	0	10.74	0
ENSBTAG00000022244	ACTN3	M	0	0	0	10.3477	0	0	0	0	10.1241	0
ENSBTAG00000020928	ADPRHL1	M	0	0.941935	0	5.71288	0.0960168	0	1.4689	0	5.78473	0
ENSBTAG00000011548	AMPD1	M	0	0	0	7.40475	0	0	0	0	6.89049	0
ENSBTAG00000011734	ANKRD1	M	0	0	0.0498453	8.3641	0	0	0	0.336155	7.52435	0
ENSBTAG00000012720	ANKRD2	M	0.226783	1.57622	0	6.31872	0.00136609	0.592165	1.56043	0.037441	6.25163	0.309544
ENSBTAG00000010849	ANKRD23	M	0.214224	1.83224	0.174498	10.4342	1.42708	0.119233	1.95613	0.191441	10.3516	1.33367
ENSBTAG00000005974	APOBEC2	M	0.627636	0.681626	0	9.55375	0.561787	0.483561	0.687412	0.214596	9.65353	0.341788
ENSBTAG00000020105	AQP7	M	0	0.32858	0.0285887	6.41205	0	0	0.405162	0	6.25222	0
ENSBTAG00000007211	ASB12	M	0.280701	0	0.00386158	7.12739	0	0.152971	0.0652273	0	6.86484	0
ENSBTAG00000007109	ASB2	M	0	1.98333	0.0785476	8.01781	0.0167948	0	2.23557	0.3198	8.17436	0
ENSBTAG00000014143	ASB5	M	0	0	0	7.12335	0	0	0	0	7.211	0
ENSBTAG00000008920	ATP1B4	M	0	0	0	5.30099	0	0	0	0	5.07427	0
ENSBTAG00000006541	ATP2A1	M	1.28229	0.160806	0	10.937	0.369095	1.34387	0.184944	0	10.6872	0.0841035
ENSBTAG00000029926	bta-mir-1-2	M	0	0	0	5.87412	0	0	0	0	5.90109	0
ENSBTAG00000029906	bta-mir-133a-2	M	0	0	0	6.30325	0	0	0	0	6.24594	0
ENSBTAG00000047155	C10orf71	M	0	0	0	7.35027	0	0	0	0	7.06812	0
ENSBTAG00000047491	CACNA1S	M	0.259476	0.124096	0	6.46254	0	0	0	0	6.24144	0
ENSBTAG00000007547	CACNG1	M	0	0	0	6.135	0	0	0	0	6.15165	0
ENSBTAG00000021657	CACNG6	M	0	0	0	5.30475	0.156342	0	0	0	5.14483	0.150255
ENSBTAG00000008868	CAPN3	M	0	1.30626	0	7.53513	0	0	0.985525	0	7.45029	0
ENSBTAG00000011500	CASQ2	M	0	0.859933	0	5.33513	0	0	1.51283	0	5.5772	0
ENSBTAG00000022699	CAV3	M	0	0	0	5.83138	0	0	0	0	5.59038	0
ENSBTAG00000021992	CAVIN4	M	0	1.55222	0	5.95677	0.00593703	0	1.7803	0	5.88783	0
ENSBTAG00000018253	CHRNA1	M	0	0	0	5.11345	0	0	0	0	5.23472	0.0313142
ENSBTAG00000013921	CKM	M	0.242571	0	0	13.2828	0	0	0.182886	0	13.1477	0
ENSBTAG00000006823	CMYA5	M	0.0457031	0	0.427677	8.7596	0	0	0	0.0308862	8.76098	0
ENSBTAG00000023806	COBL	M	0	1.24836	0.00217503	5.86275	0.381917	0	1.03506	0.0954757	5.79589	0.145236
ENSBTAG00000019521	COX6A2	M	0	0	0.198805	9.4533	0	0	0	0.154033	9.46391	0
ENSBTAG00000011869	CSRP3	M	0	0.0150196	0	10.5529	0	0	0	0	11.1507	0
ENSBTAG00000005048	DHRS7C	M	0	0	0	8.0045	0	0	0	0	7.96792	0
ENSBTAG00000002924	DUPD1	M	0	0	0	5.06682	0	0	0	0	4.82895	0
ENSBTAG00000023039	DUSP13	M	0	0	0	6.68192	0	0	0	0	6.62612	0
ENSBTAG00000008652	DUSP27	M	0	0	0	6.59811	0	0	0	0	6.46834	0
ENSBTAG00000009703	ENSBTAG00000009703	M	0.152116	0.938003	0	12.4591	0.734815	0	0.672386	0	12.6371	0.514672
ENSBTAG00000038849	ENSBTAG00000038849	M	0	0	0	9.08962	0	0	0	0	9.00364	0
ENSBTAG00000040053	ENSBTAG00000040053	M	0	0.0677544	0	8.19356	1.50481	0	0.0493611	0	8.44097	1.77791
ENSBTAG00000045889	ENSBTAG00000045889	M	0	0	0	7.48195	0	0	0	0	6.95904	0
ENSBTAG00000046177	ENSBTAG00000046177	M	0	0	0	5.01364	0	0	0	0	6.82753	0
ENSBTAG00000046333	ENSBTAG00000046333	M	0	0	0	5.40394	0	0	0	0	5.3804	0
ENSBTAG00000047174	ENSBTAG00000047174	M	0	0	0	7.69944	0	0	0	0	7.56287	0
ENSBTAG00000019554	FBP2	M	0	0	0.0862767	7.61077	0	0	0.0696229	1.32496	7.95685	0
ENSBTAG00000014508	FBXO40	M	0	0	0	6.33531	0.0666209	0	0.240336	0	6.12946	0.196064
ENSBTAG00000033422	HHATL	M	0	1.36197	0	6.0582	0	0	1.69334	0	5.84207	0
ENSBTAG00000002853	HRC	M	0	0.243894	0	7.30497	0	0	0.261254	0	7.26767	0
ENSBTAG00000010940	HSPB7	M	0	0.144078	0	9.26101	0	0.0642219	0	0	9.42846	0
ENSBTAG00000012163	ITGB1BP2	M	0	0	0	4.87932	0	0	0.002075	0.0188819	4.74792	0
ENSBTAG00000023002	JPH2	M	0.490766	0	0	5.66219	0	0.273441	0.100554	0	5.66104	0
ENSBTAG00000011547	KBTBD12	M	0	0.0733621	0	5.70063	0	0	0	0	5.70925	0
ENSBTAG00000018167	KLHL31	M	0	0	0	5.36281	0	0	0	0	5.3444	0
ENSBTAG00000001183	KLHL33	M	0	0	0	5.24438	0	0	0	0	4.97136	0
ENSBTAG00000006563	KLHL40	M	0	0	0	6.61535	0.316341	0	0	0	6.53774	0.377653
ENSBTAG00000018707	LDB3	M	0	1.73954	0	9.78816	0	0	2.03606	0	9.98757	0
ENSBTAG00000002157	LMOD2	M	0	0.288618	0.0254472	8.63182	0	0	0.183092	0.0840432	8.73626	0
ENSBTAG00000021508	LMOD3	M	0	0	0	8.59876	0	0	0	0	8.15743	0
ENSBTAG00000008013	LRRC2	M	0.85343	0.0294091	0	6.16587	0.842411	0.566861	0	0.0155083	6.3235	0.846418
ENSBTAG00000015786	LRRC39	M	0	0	0	7.47777	0	0	0	0	7.48377	0
ENSBTAG00000005333	MB	M	0.328291	0.237652	0	14.0083	0	0	0.632116	0	14.0601	0
ENSBTAG00000001344	METTL21E	M	0	0	0	5.00682	0	0	0	0	4.76733	0
ENSBTAG00000020219	MSS51	M	0	0	0	6.05324	0	0	0	0.0414761	6.21115	0
ENSBTAG00000011392	MYBPC1	M	0	0	0	11.8135	0	0	0	0	11.8874	0
ENSBTAG00000020080	MYBPC2	M	0.0972265	0	0.00137532	9.72284	0	0.073512	0	0.0775792	9.63224	0
ENSBTAG00000014003	MYF6	M	0	0	0	7.28301	0	0.0533924	0.229082	0	6.96538	0
ENSBTAG00000018204	MYH1	M	0	0	0	10.5982	0	0	0.0387146	0	8.92684	0
ENSBTAG00000007090	MYH2	M	0	0	0	11.7321	0	0	0	0	12.2689	0
ENSBTAG00000009707	MYL1	M	0.0685404	0	0	11.8596	0	0	0.0220899	0	11.8472	0
ENSBTAG00000018369	MYL2	M	0.37702	1.14883	0	14.0034	0	0	0.585324	0	13.8786	0
ENSBTAG00000008394	MYL3	M	0	0	0	9.62691	0	0	0	0	9.13822	0
ENSBTAG00000014930	MYLK2	M	0	0	0	8.47519	0	0	0	0	8.30009	0
ENSBTAG00000021218	MYLPF	M	0.0880764	0	0	13.4979	0	0	0.418684	0	13.3523	0
ENSBTAG00000000698	MYO18B	M	0	0	0	6.29161	0	0.015232	0	0	6.20485	0
ENSBTAG00000009387	MYOM2	M	0	0.11601	0.0517286	8.51242	0	0	0.0118446	0	8.3669	0
ENSBTAG00000014885	MYOM3	M	0	0.037548	0	7.5319	0	0	0.356984	0	7.58976	0
ENSBTAG00000007782	MYOT	M	0	0.418109	0	10.8938	0	0	1.02274	0	10.9368	0
ENSBTAG00000002574	MYOZ2	M	0	0	0	9.68957	0	0	0	0	9.3651	0
ENSBTAG00000025136	MYOZ3	M	0	0	0	7.42806	0	0	0	0	6.92832	0
ENSBTAG00000017509	MYPN	M	0	0	0	6.75156	0	0	0	0	6.73057	0
ENSBTAG00000006907	NEB	M	0	0	0	9.66414	0	0	0	0	9.63133	0
ENSBTAG00000031573	NMRK2	M	0.0180206	1.68519	0	9.55548	0	0	1.51159	0	9.62164	0
ENSBTAG00000019327	NRAP	M	0.329404	0.147376	0	8.81167	1.86994	0.0157817	0	0	8.53182	1.73744
ENSBTAG00000047752	OTUD1	M	1.2295	1.53532	0.00541613	6.42562	1.86438	0.914145	1.36609	0.14917	5.8142	1.86484
ENSBTAG00000014540	PERM1	M	0	0	0	6.79173	0	0	0	0	6.89861	0
ENSBTAG00000014547	PGAM2	M	0.0320049	1.10091	0	9.90944	0.291133	0.0187537	1.33684	0	9.88175	0.223704
ENSBTAG00000012931	PLN	M	1.24555	0.984629	0.54427	8.56017	0.39791	1.62534	0.76096	0.68109	8.35201	0.185335
ENSBTAG00000024929	PPP1R27	M	0	0	0	8.96602	0	0	0	0.0711116	9.02424	0
ENSBTAG00000006733	PPP1R3A	M	0	0	0	7.43419	0	0	0	0	7.3928	0
ENSBTAG00000009533	RPL3L	M	0.82492	0	0.453496	7.83023	0	0.614714	0.0556671	0.791969	7.97535	0
ENSBTAG00000006999	RYR1	M	0	0.704911	0	8.81166	0	0	0.701009	0	8.76734	0
ENSBTAG00000001865	SGCG	M	0.112551	0	0	5.66393	0	0	0	0	5.69057	0
ENSBTAG00000013319	SMCO1	M	0	0	0	4.94116	0	0	0	0	4.89548	0
ENSBTAG00000015204	SMPX	M	0	0.492879	0	9.51296	0.874457	0	0.784597	0	9.40893	0.763069
ENSBTAG00000027524	SMTNL1	M	0	0	0	8.41471	0	0	0	0	8.27015	0
ENSBTAG00000021120	SMYD1	M	0	0	0	5.56283	0	0	0	0	5.82718	0
ENSBTAG00000001078	SRL	M	0	0.316883	0	7.49387	0.627877	0.016121	0.188943	0	7.40623	0.0396288
ENSBTAG00000018358	STAC3	M	0	0	0	8.43764	0	0	0	0	8.24144	0
ENSBTAG00000021132	SYNPO2L	M	0	0	0	6.8271	0	0	0	0	6.80817	0
ENSBTAG00000015470	SYPL2	M	0	0	0	7.44163	0	0	0.077141	0	7.51073	0
ENSBTAG00000010786	TACC2	M	1.9859	1.90815	0	5.92338	2.02002	1.95565	2.17452	0	6.14598	1.9753
ENSBTAG00000007767	TBX15	M	0	0	0	6.28524	0	0	0	0	6.07738	0
ENSBTAG00000038462	TMEM182	M	0	0.0198588	0	5.38482	0	0	0	0	5.26807	0
ENSBTAG00000018071	TMOD4	M	0	0.866284	0.0212408	9.70194	0	0	1.2295	0.0400351	9.75728	0
ENSBTAG00000045757	TNNC1	M	0.300378	0	0	13.5285	0.0139136	0	0.165603	0	13.6172	0.0502071
ENSBTAG00000046725	TNNC2	M	0.227034	0	0	13.3898	0	0	0.319248	0	13.3155	0
ENSBTAG00000047231	TNNI1	M	0.0967379	0.00324074	0	11.6797	0	0	0.105686	0	11.6055	0
ENSBTAG00000010880	TNNI2	M	0	0	0.389649	12.1666	0	0	0.1938	0.0601789	12.0303	0
ENSBTAG00000022158	TNNT3	M	0.12887	0	0	13.191	0	0	0.202344	0	13.0578	0
ENSBTAG00000018267	TRIM54	M	0	0	0	7.83974	0	0	0	0	7.95932	0
ENSBTAG00000005085	TRIM63	M	0	0	0	7.2876	0	0	0	0	6.71083	0
ENSBTAG00000001503	TRIM72	M	0	0	0	6.60395	0	0	0	0	6.75244	0
ENSBTAG00000026986	TTN	M	0	0	0	8.31073	0	0	0	0	8.28459	0
ENSBTAG00000002964	TXLNB	M	0	0	0	6.79708	0	0	0	0	6.85461	0
ENSBTAG00000005259	UCP3	M	0	0	0	6.6348	0	0	0	0	6.54954	0
ENSBTAG00000002898	UNC45B	M	0	0	0	6.35849	0	0	0	0	6.55097	0
ENSBTAG00000046512	XIRP1	M	0	0	0	6.52953	0	0	0	0	6.34459	0
ENSBTAG00000017743	XIRP2	M	0	0	0	8.16283	0	0	0	0	7.80392	0
ENSBTAG00000001603	YIPF7	M	0	0	0	5.38251	0	0	0	0	5.28207	0
ENSBTAG00000047043	DCXR	P	0.0999011	0.590459	0	0	6.46954	0	0.26116	0	0	7.07773
ENSBTAG00000039236	ENSBTAG00000039236	P	0	0.92941	0	0	7.68025	0	0.44967	0	0	6.78938
ENSBTAG00000006474	EPCAM	P	0.125931	1.33313	0.653587	0.479006	6.65589	0	0.704944	1.26101	0	6.50069
ENSBTAG00000010889	FSHB	P	0	1.03471	0	0	8.98844	0	0.593682	0	0	7.81949
ENSBTAG00000001136	KIAA1324	P	0	1.53497	0	0	7.2084	0	1.01457	0	0	7.24365
ENSBTAG00000011124	LHX3	P	0	0.556267	0	0	6.48932	0	0.153146	0	0	6.38386
ENSBTAG00000009128	POU1F1	P	0	0.656082	0	0	6.90149	0	0.147116	0	0	6.95219
ENSBTAG00000013035	SIX6	P	0	0.503324	0	0	6.68527	0	0.246856	0	0	6.73374
ENSBTAG00000006295	TSHB	P	0.0058022	1.58672	0	0	9.8488	0	1.31606	0	0	10.9566

## Sheet: D
Supplementary Table 3. Genes selected for network construction for coding proteins secreted in plasma.
Gene ID	Gene Name	Tissue of secretion			A - Adrenal gland
ENSBTAG00000001396	ADAMTS7	A			H - Hypothalamus
ENSBTAG00000019813	ADIPOQ	A			L - Liver
ENSBTAG00000014556	AGRP	A			M - Muscle
ENSBTAG00000015789	BCAN	A			P - Pituitary
ENSBTAG00000010343	C1QTNF7	A
ENSBTAG00000009836	CHGA	A
ENSBTAG00000020679	CNTN1	A
ENSBTAG00000013662	COL8A1	A
ENSBTAG00000000456	CPB1	A
ENSBTAG00000014335	CYP17A1	A
ENSBTAG00000011163	CYTL1	A
ENSBTAG00000003880	EMILIN2	A
ENSBTAG00000001019	GDF10	A
ENSBTAG00000013003	INS	A
ENSBTAG00000017390	LGI2	A
ENSBTAG00000012994	LOX	A
ENSBTAG00000009086	LOXL1	A
ENSBTAG00000002998	MELTF	A
ENSBTAG00000006780	NAPSA	A
ENSBTAG00000007446	NGF	A
ENSBTAG00000000109	NPTXR	A
ENSBTAG00000009012	PTX3	A
ENSBTAG00000003625	VSTM2A	A
ENSBTAG00000017524	CBLN4	AH
ENSBTAG00000004503	NPY	AH
ENSBTAG00000021588	SCG2	AHP
ENSBTAG00000017312	SST	AHP
ENSBTAG00000009868	VGF	AHP
ENSBTAG00000045492	ANG	AL
ENSBTAG00000020558	APOC2	AL
ENSBTAG00000008341	ARSB	AL
ENSBTAG00000020178	ARSK	AL
ENSBTAG00000000917	BMP1	AL
ENSBTAG00000012210	C5	AL
ENSBTAG00000014177	C6	AL
ENSBTAG00000011766	C7	AL
ENSBTAG00000007615	CNTN3	AL
ENSBTAG00000032656	CPN2	AL
ENSBTAG00000004273	CST7	AL
ENSBTAG00000020773	CTSW	AL
ENSBTAG00000001725	CXCL10	AL
ENSBTAG00000027513	CXCL2	AL
ENSBTAG00000019716	CXCL8	AL
ENSBTAG00000038639	CXCL9	AL
ENSBTAG00000008096	EDN1	AL
ENSBTAG00000007534	GGH	AL
ENSBTAG00000004982	GPLD1	AL
ENSBTAG00000016284	IL7	AL
ENSBTAG00000031647	LRG1	AL
ENSBTAG00000019315	PLA2G7	AL
ENSBTAG00000015654	PON1	AL
ENSBTAG00000034645	PON3	AL
ENSBTAG00000012409	POSTN	AL
ENSBTAG00000011932	PRG4	AL
ENSBTAG00000012838	RDH12	AL
ENSBTAG00000014465	SERPINE1	AL
ENSBTAG00000009150	SPON1	AL
ENSBTAG00000004280	SRPX	AL
ENSBTAG00000018810	THBS2	AL
ENSBTAG00000007423	TNFRSF11B	AL
ENSBTAG00000015094	VNN1	AL
ENSBTAG00000016151	VTN	AL
ENSBTAG00000020221	WNT5A	AL
ENSBTAG00000018137	A2M	ALM
ENSBTAG00000012393	AGT	ALM
ENSBTAG00000017852	ALDH9A1	ALM
ENSBTAG00000008133	ALKBH1	ALM
ENSBTAG00000019093	AMY2B	ALM
ENSBTAG00000010123	APOE	ALM
ENSBTAG00000011847	ASPN	ALM
ENSBTAG00000047649	AUH	ALM
ENSBTAG00000012330	B2M	ALM
ENSBTAG00000022238	B4GAT1	ALM
ENSBTAG00000007153	C1QA	ALM
ENSBTAG00000011196	C1QB	ALM
ENSBTAG00000011193	C1QC	ALM
ENSBTAG00000010520	C8G	ALM
ENSBTAG00000010738	CCL14	ALM
ENSBTAG00000037811	CCL2	ALM
ENSBTAG00000010161	CCL21	ALM
ENSBTAG00000015032	CD14	ALM
ENSBTAG00000034501	CFI	ALM
ENSBTAG00000002878	CHRD	ALM
ENSBTAG00000005576	CLEC11A	ALM
ENSBTAG00000019956	CMPK1	ALM
ENSBTAG00000013472	COL1A2	ALM
ENSBTAG00000011802	COL6A1	ALM
ENSBTAG00000000598	CST3	ALM
ENSBTAG00000006367	CTGF	ALM
ENSBTAG00000012442	CTSB	ALM
ENSBTAG00000017135	CTSS	ALM
ENSBTAG00000018784	CTSZ	ALM
ENSBTAG00000009887	DDX17	ALM
ENSBTAG00000018717	DDX20	ALM
ENSBTAG00000004275	DKK3	ALM
ENSBTAG00000003806	ECM1	ALM
ENSBTAG00000024081	ECM2	ALM
ENSBTAG00000019517	ELN	ALM
ENSBTAG00000012484	ENDOG	ALM
ENSBTAG00000005542	EPS15	ALM
ENSBTAG00000009804	ERP44	ALM
ENSBTAG00000016385	F10	ALM
ENSBTAG00000003607	FAM20C	ALM
ENSBTAG00000018123	FBLN5	ALM
ENSBTAG00000002278	FBN1	ALM
ENSBTAG00000009717	FGL2	ALM
ENSBTAG00000030434	FUCA1	ALM
ENSBTAG00000004870	GALNT2	ALM
ENSBTAG00000018972	GARS	ALM
ENSBTAG00000000666	GHDC	ALM
ENSBTAG00000007540	GLUD1	ALM
ENSBTAG00000014118	GNPTG	ALM
ENSBTAG00000031569	GOLM1	ALM
ENSBTAG00000007172	GOT2	ALM
ENSBTAG00000000704	GUSB	ALM
ENSBTAG00000004246	H6PD	ALM
ENSBTAG00000012981	HEXA	ALM
ENSBTAG00000011444	HINT2	ALM
ENSBTAG00000010322	HYOU1	ALM
ENSBTAG00000016169	ID1	ALM
ENSBTAG00000011082	IGF1	ALM
ENSBTAG00000008611	IGFBP4	ALM
ENSBTAG00000007062	IGFBP5	ALM
ENSBTAG00000019368	IGFBP7	ALM
ENSBTAG00000018531	JCHAIN	ALM
ENSBTAG00000010229	LAMA2	ALM
ENSBTAG00000018926	LEAP2	ALM
ENSBTAG00000001368	LGALS3BP	ALM
ENSBTAG00000001745	LUM	ALM
ENSBTAG00000026779	LYZ	ALM
ENSBTAG00000006241	MAN2B1	ALM
ENSBTAG00000019761	MANBA	ALM
ENSBTAG00000012808	MASP2	ALM
ENSBTAG00000006187	MFAP4	ALM
ENSBTAG00000007684	MSH3	ALM
ENSBTAG00000009506	NAGA	ALM
ENSBTAG00000000759	NENF	ALM
ENSBTAG00000007244	NID1	ALM
ENSBTAG00000002378	NUCB1	ALM
ENSBTAG00000032996	P4HA1	ALM
ENSBTAG00000020528	PCOLCE	ALM
ENSBTAG00000017196	PDIA3	ALM
ENSBTAG00000017143	PDIA4	ALM
ENSBTAG00000013688	PGF	ALM
ENSBTAG00000001244	PLAT	ALM
ENSBTAG00000002052	PLOD1	ALM
ENSBTAG00000016822	PPIB	ALM
ENSBTAG00000017834	PRELP	ALM
ENSBTAG00000008202	PRKCSH	ALM
ENSBTAG00000018082	QPRT	ALM
ENSBTAG00000004215	RARRES2	ALM
ENSBTAG00000019612	RNASE4	ALM
ENSBTAG00000004063	SERPINA5	ALM
ENSBTAG00000008717	SERPINE2	ALM
ENSBTAG00000044126	SNTB1	ALM
ENSBTAG00000013980	SOD3	ALM
ENSBTAG00000005260	SPP1	ALM
ENSBTAG00000017863	SRGN	ALM
ENSBTAG00000006075	SUCLG1	ALM
ENSBTAG00000002006	THBS1	ALM
ENSBTAG00000002431	TRIM24	ALM
ENSBTAG00000011024	TXNDC12	ALM
ENSBTAG00000012265	VWF	ALM
ENSBTAG00000020202	CRHBP	ALP
ENSBTAG00000002912	INHBA	ALP
ENSBTAG00000023600	APOD	AM
ENSBTAG00000048122	CFD	AM
ENSBTAG00000010082	COL15A1	AM
ENSBTAG00000021310	COL4A4	AM
ENSBTAG00000021467	IGFBP6	AM
ENSBTAG00000020342	MYOC	AM
ENSBTAG00000002080	NOV	AM
ENSBTAG00000004924	PENK	AM
ENSBTAG00000020263	TIMP4	AM
ENSBTAG00000006037	WISP2	AM
ENSBTAG00000020267	WNT9A	AM
ENSBTAG00000013027	CCK	H
ENSBTAG00000008026	OXT	HLP
ENSBTAG00000033128	CRH	HP
ENSBTAG00000009393	GAL	HP
ENSBTAG00000047833	AFM	L
ENSBTAG00000000522	AHSG	L
ENSBTAG00000011034	ANGPT2	L
ENSBTAG00000021386	ANGPTL3	L
ENSBTAG00000039302	ANGPTL6	L
ENSBTAG00000019616	APCS	L
ENSBTAG00000019770	APOA4	L
ENSBTAG00000019764	APOA5	L
ENSBTAG00000008505	APOB	L
ENSBTAG00000012398	APOC3	L
ENSBTAG00000020556	APOC4	L
ENSBTAG00000004384	APOF	L
ENSBTAG00000010866	BMPER	L
ENSBTAG00000009876	C4BPA	L
ENSBTAG00000017714	C4BPB	L
ENSBTAG00000003774	C8A	L
ENSBTAG00000016149	C9	L
ENSBTAG00000007193	CCL16	L
ENSBTAG00000022514	CD5L	L
ENSBTAG00000017343	COLEC10	L
ENSBTAG00000007073	CPB2	L
ENSBTAG00000037778	CXCL3	L
ENSBTAG00000037559	CYP2C18	L
ENSBTAG00000023549	CYP2C19	L
ENSBTAG00000018872	F12	L
ENSBTAG00000000070	F13B	L
ENSBTAG00000017722	F5	L
ENSBTAG00000007411	F7	L
ENSBTAG00000004003	F9	L
ENSBTAG00000001638	FGA	L
ENSBTAG00000016177	FGL1	L
ENSBTAG00000013718	GC	L
ENSBTAG00000005004	GDF2	L
ENSBTAG00000007194	GUCA2B	L
ENSBTAG00000003564	HPX	L
ENSBTAG00000001265	HRG	L
ENSBTAG00000046768	IGFBP1	L
ENSBTAG00000019084	INHBC	L
ENSBTAG00000014075	ITIH2	L
ENSBTAG00000007846	ITIH3	L
ENSBTAG00000005122	KNG1	L
ENSBTAG00000016864	LBP	L
ENSBTAG00000014149	LCN2	L
ENSBTAG00000007049	MBL2	L
ENSBTAG00000004594	MMP7	L
ENSBTAG00000020676	MMP9	L
ENSBTAG00000009348	OIT3	L
ENSBTAG00000005973	OVGP1	L
ENSBTAG00000039028	PI3	L
ENSBTAG00000009350	PLA2G12B	L
ENSBTAG00000001271	PLG	L
ENSBTAG00000019440	PROZ	L
ENSBTAG00000012621	RTN4RL2	L
ENSBTAG00000002963	SAA4	L
ENSBTAG00000038361	SERPINA11	L
ENSBTAG00000039808	SERPINA6	L
ENSBTAG00000047655	SERPINA7	L
ENSBTAG00000004362	SERPINC1	L
ENSBTAG00000013973	SERPIND1	L
ENSBTAG00000020859	SERPINF2	L
ENSBTAG00000015558	SPINK1	L
ENSBTAG00000010991	TTR	L
ENSBTAG00000016138	CGA	P
ENSBTAG00000015274	PRL	P

## Sheet: E
Supplementary Table 3. Genes selected for network construction for being key regulators.
			Adrenal		Hypothalamus		Liver		Muscle		Pituitary
Gene ID	Gene Name	Tissue of regulation	RIF1	RIF2	RIF1	RIF2	RIF1	RIF2	RIF1	RIF2	RIF1	RIF2
ENSBTAG00000012237	AEBP1	A	-4.88019	0.73293										A - Adrenal gland
ENSBTAG00000001511	BCL6	A	-3.06539	1.27444										H - Hypothalamus
ENSBTAG00000009863	BHLHE40	A	-3.08831	-0.571678										L - Liver
ENSBTAG00000045925	CITED1	A	-4.23769	-0.629357										M - Muscle
ENSBTAG00000008480	CTBP1	A	-3.20071	0.4407										P - Pituitary
ENSBTAG00000021884	CXXC1	A	-2.93102	0.396077										RIF - Regulatory Impact Factor metrics (Reverter et al., 2010)
ENSBTAG00000014605	ETV6	A	-2.72347	0.854454
ENSBTAG00000047855	MECP2	A	-3.34957	0.0471341
ENSBTAG00000046670	MLX	A	-3.01666	0.273966
ENSBTAG00000016683	NFKBIA	A	-2.80854	0.960936
ENSBTAG00000020578	PRDM6	A	-3.09608	1.50658
ENSBTAG00000003949	RBM39	A	2.98114	-0.483448
ENSBTAG00000018884	RING1	A	-3.61408	0.777441
ENSBTAG00000020457	TGFB1	A	-2.61173	0.937275
ENSBTAG00000018074	VPS72	A	-2.84662	0.107981
ENSBTAG00000005572	ZNF205	A	-2.60799	-0.820621
ENSBTAG00000001904	ZNF276	A	-3.2221	0.768086
ENSBTAG00000010130	ZNF335	A	-2.74313	0.435765
ENSBTAG00000030169	SUMO2	AP	-3.78049	0.904341							1.73729	-3.12033
ENSBTAG00000038866	UBE2I	AP	-2.69172	1.87644							2.78774	0.723196
ENSBTAG00000043564	ATP8	H			2.98001	0.847298
ENSBTAG00000009842	CRYM	H			-2.86449	-0.558736
ENSBTAG00000043550	cytb	H			3.19385	1.0008
ENSBTAG00000046711	ENSBTAG00000046711	H			-2.90638	2.67217
ENSBTAG00000048135	ENSBTAG00000048135	H			-2.96292	0.228594
ENSBTAG00000008182	FOSB	H			-1.36637	3.2931
ENSBTAG00000009451	JDP2	H			2.57697	-0.051102
ENSBTAG00000043559	MT-ND4L	H			2.84436	1.04121
ENSBTAG00000043558	ND1	H			2.77277	1.06961
ENSBTAG00000043577	ND4	H			2.90938	1.14805
ENSBTAG00000043563	ND5	H			2.75092	1.13883
ENSBTAG00000043546	ND6	H			2.60486	1.04753
ENSBTAG00000001864	NR4A3	H			-1.45214	2.70174
ENSBTAG00000037726	PLCD1	H			2.61171	1.1898
ENSBTAG00000000694	TAF10	H			2.62389	1.31399
ENSBTAG00000017594	ZHX3	H			2.74008	-0.628923
ENSBTAG00000039684	CAVIN1	L					-0.857526	-2.70667
ENSBTAG00000006633	IRF3	L					1.0315	-2.59222
ENSBTAG00000005780	LDB1	L					-2.96588	0.614597
ENSBTAG00000011136	NR2F6	L					0.869224	-2.70283
ENSBTAG00000001790	SAFB2	L					1.14469	-2.68264
ENSBTAG00000016191	ZNF32	L					-3.48409	0.337483
ENSBTAG00000006170	ZNF76	L					0.761352	-2.9448
ENSBTAG00000031687	ENSBTAG00000031687	M							4.66081	2.20536
ENSBTAG00000001552	EPC1	M							3.38704	0.168614
ENSBTAG00000047293	NRIP1	M							3.06377	0.401009
ENSBTAG00000015976	PHF12	M							3.01119	0.274955
ENSBTAG00000006423	PHF5A	M							2.99232	1.32513
ENSBTAG00000037493	PUF60	M							3.27702	-0.464454
ENSBTAG00000018258	SRSF2	M							2.72455	0.38903
ENSBTAG00000021523	STAT3	M							2.87772	1.3389
ENSBTAG00000016349	TEAD2	M							2.85136	0.133998
ENSBTAG00000038842	NEDD8	MP							3.87554	1.0873	2.80302	-0.741596
ENSBTAG00000015655	APBB1	P									2.94953	0.0131389
ENSBTAG00000010012	BTF3	P									3.18672	-1.29644
ENSBTAG00000012739	C1QBP	P									4.5715	0.18642
ENSBTAG00000008931	CREG1	P									2.62878	-0.395197
ENSBTAG00000020777	ERCC3	P									2.65255	-0.727719
ENSBTAG00000017329	GMNN	P									3.23325	-0.0484366
ENSBTAG00000007208	HDAC11	P									3.15457	0.308386
ENSBTAG00000002333	HOPX	P									-0.378195	-2.67754
ENSBTAG00000021187	ID2	P									3.11415	0.518914
ENSBTAG00000030425	ID3	P									3.61095	-0.260872
ENSBTAG00000030710	ITGB3BP	P									3.59623	-0.804474
ENSBTAG00000005082	MED21	P									3.74319	0.399488
ENSBTAG00000000382	MED27	P									3.03387	-1.72
ENSBTAG00000010701	NACA	P									4.03348	-1.02979
ENSBTAG00000015316	NPM1	P									2.85374	-1.44453
ENSBTAG00000009477	PIR	P									-0.579724	2.7337
ENSBTAG00000004602	PITX1	P									2.98983	0.615902
ENSBTAG00000020160	RNF138	P									3.25442	-2.1907
ENSBTAG00000000602	RXRB	P									2.87367	-0.287922
ENSBTAG00000032887	SUPT3H	P									-0.179157	-2.97661
ENSBTAG00000014677	TADA2A	P									3.62793	-0.119423
ENSBTAG00000021836	TCEA2	P									2.90888	-1.33905
ENSBTAG00000019906	VPS25	P									3.72485	-0.626935
ENSBTAG00000016846	YWHAB	P									0.557783	-2.78433
ENSBTAG00000043974	ZNF768	P									2.62323	-0.674579
