# Supplementary material for: Systems Biology Reveals NR2F6 and TGFB1 as Key Regulators of Feed Efficiency in Beef Cattle
Source: Front Genet. 2019 Mar 22;10:230. doi: 10.3389/fgene.2019.00230 (PMC6439317; doi:10.3389/fgene.2019.00230)
Supplement: Supplementary file 9 [file Table_9.XLSX]

## Sheet: Supplementary Table 9
Supplementary Table 9. MYOD predicted transcription factors binding sites in mm9.
Chromosome	Start position	End position	Region ID
chr5	139218317	139219477	chr7-reg197
chr5	139229836	139231589	chr7-reg211
chr5	139232179	139233668	chr7-reg212
chr5	139233933	139234865	chr7-reg214
chr5	139236146	139236802	chr7-reg218
chr5	139236802	139237807	chr7-reg219
chr5	139238141	139238503	chr7-reg221
chr17	25408822	25411072	chr16-reg1742
chr7	149626768	149628395	chr11-reg2103
chr7	149681403	149682611	chr11-reg2182
chr7	149683063	149683803	chr11-reg2185
chr7	149683803	149685385	chr11-reg2187
chr7	149685430	149686833	chr11-reg2189
chr7	149687747	149687962	chr11-reg2192
chr8	15049281	15050600	chr8-reg2026
chr8	15056894	15057941	chr8-reg2038
chr17	24870963	24872228	chr16-reg2590
chr8	15062323	15063799	chr8-reg2046
chr8	15065997	15066794	chr8-reg2052
chr10	80391453	80393060	chr19-reg2948
chr10	80394391	80395937	chr19-reg2952
chr13	32866620	32867883	chr6-reg2584
chr13	32868079	32869330	chr6-reg2586
chr13	32870376	32871237	chr6-reg2589
chr13	32871743	32873122	chr6-reg2591
chr13	32875199	32876281	chr6-reg2595
chr13	32878698	32879627	chr6-reg2601
chr17	23722461	23723815	chr16-reg4056
chr17	23721316	23722181	chr16-reg4058
chr16	4512630	4514451	chr16-reg5319
chr16	4514451	4514943	chr16-reg5320
chr16	4518922	4519355	chr16-reg5327
chr16	4519992	4520379	chr16-reg5329
chr16	4521405	4522300	chr16-reg5333
chr16	4523053	4523693	chr16-reg5336
chr16	4530967	4531075	chr16-reg5340
chr16	4537319	4537413	chr16-reg5344
chr16	4537760	4538819	chr16-reg5346
chr17	56722494	56723696	chr19-reg6804
chr6	112399900	112400672	chr3-reg4779
chr6	112409237	112409805	chr3-reg4789
chr6	112412633	112413030	chr3-reg4795
chr6	112417526	112417917	chr3-reg4805
chr16	8637921	8638686	chr16-reg8684
chr11	67616328	67616909	chr17-reg10771
chr11	67611037	67612127	chr17-reg10777
chr11	66984044	66984990	chr17-reg11639
chr11	66978450	66979267	chr17-reg11641
chr11	66976812	66977749	chr17-reg11643
chr9	21871118	21871595	chr19-reg13161
chr8	86135323	86135853	chr19-reg15996
chr4	140980705	140981406	chr1-reg16762
chr4	140979973	140980602	chr1-reg16763
chr4	140978662	140979679	chr1-reg16765
chr4	140977895	140978251	chr1-reg16768
chr4	140975853	140977672	chr1-reg16770
chr4	140973508	140975853	chr1-reg16771
chr4	140971210	140972613	chr1-reg16773
chr4	140632576	140632938	chr1-reg17308
chr4	140630975	140632535	chr1-reg17309
chr4	140630716	140630874	chr1-reg17310
chr4	140628552	140629163	chr1-reg17318
chr4	140627671	140628397	chr1-reg17321
chr4	140627198	140627671	chr1-reg17322
chr7	53621232	53621523	chr11-reg15391
chr7	53623874	53625295	chr11-reg15395
chr7	53625451	53626449	chr11-reg15397
chr7	53626449	53626985	chr11-reg15398
chr7	53627341	53628013	chr11-reg15400
chr7	53628013	53629568	chr11-reg15401
chr7	53630241	53630921	chr11-reg15404
chr7	53632669	53633109	chr11-reg15407
chr7	53633764	53634497	chr11-reg15409
chr7	56094144	56094790	chr11-reg16558
chr7	56095807	56096312	chr11-reg16561
chr7	56097556	56098080	chr11-reg16563
chr7	56100705	56101534	chr11-reg16566
chr7	56101534	56102265	chr11-reg16567
chr7	56102854	56103970	chr11-reg16569
chr7	126675494	126676053	chr16-reg18350
chr14	51514521	51515017	chr14-reg441
chr14	51515017	51515226	chr14-reg442
chr14	51515748	51517148	chr14-reg444
chr8	96855558	96857228	chr14-reg449
chr8	96865111	96865263	chr14-reg451
chr8	96866881	96868833	chr14-reg452
chr7	127467751	127471204	chr16-reg19059
chrX	154138301	154139015	chrX-reg10210
chrX	154137790	154138301	chrX-reg10211
chrX	154136589	154137790	chrX-reg10212
chr6	142649697	142652514	chr12-reg17517
chr2	148697943	148698439	chr20-reg18553
chr2	148698666	148700888	chr20-reg18556
chr2	148702571	148703556	chr20-reg18561
chr2	148703636	148704408	chr20-reg18563
chr2	148704949	148705908	chr20-reg18566
chr2	148712660	148713044	chr20-reg18572
chr4	135700268	135703049	chr1-reg25606
chr4	135698314	135699793	chr1-reg25608
chr4	135695728	135697178	chr1-reg25610
chr4	135694523	135695382	chr1-reg25612
chr4	135690490	135691615	chr1-reg25620
chr4	135481601	135481885	chr1-reg25942
chr4	135477065	135477539	chr1-reg25951
chr4	135324679	135325043	chr1-reg26236
chr4	135322930	135323415	chr1-reg26237
chr4	135321616	135322220	chr1-reg26239
chr4	135317517	135318434	chr1-reg26247
chr4	135315587	135317129	chr1-reg26251
chr4	135314828	135315074	chr1-reg26254
chr4	135308689	135308985	chr1-reg26261
chr5	113324640	113325796	chr22-reg8946
chr5	113322428	113323079	chr22-reg8951
chr4	133877193	133878103	chr1-reg28536
chr4	133871297	133872006	chr1-reg28547
chr4	133865587	133866721	chr1-reg28559
chr5	147655164	147656792	chr13-reg6452
chr5	147659051	147661621	chr13-reg6459
chr18	7001832	7002354	chr10-reg21181
chr18	7002542	7006318	chr10-reg21182
chr7	133608523	133609770	chr16-reg25130
chr7	133606436	133608124	chr16-reg25132
chr7	133604315	133605618	chr16-reg25135
chr7	133602016	133603012	chr16-reg25138
chr11	4966528	4967955	chr22-reg12517
chr11	4962830	4963498	chr22-reg12523
chr7	134356467	134356678	chr16-reg26482
chr2	152729002	152729715	chr20-reg21342
chr2	152730406	152730956	chr20-reg21345
chr2	152730956	152732066	chr20-reg21346
chr2	152732910	152733801	chr20-reg21350
chr2	152735657	152736293	chr20-reg21354
chr2	152736587	152737283	chr20-reg21356
chr2	152740431	152740865	chr20-reg21362
chr2	152740971	152741392	chr20-reg21363
chr2	152741864	152742145	chr20-reg21365
chr7	135146963	135147997	chr16-reg27479
chr7	135148387	135149693	chr16-reg27480
chr7	135153291	135153400	chr16-reg27494
chr7	135349809	135350024	chr16-reg27737
chr4	129373962	129375749	chr1-reg35149
chr4	129368286	129369211	chr1-reg35158
chr17	34161311	34163153	chr6-reg28958
chr4	40988621	40990977	chr9-reg18223
chr4	40992430	40992705	chr9-reg18228
chr4	40992705	40993269	chr9-reg18229
chr4	40998435	40999418	chr9-reg18238
chr11	82724061	82725181	chr17-reg28730
chr11	82730701	82731230	chr17-reg28745
chr2	113870861	113872696	chr15-reg8215
chr2	113874040	113874490	chr15-reg8218
chr2	113878202	113880253	chr15-reg8227
chr2	113882963	113883972	chr15-reg8230
chr2	113884450	113885621	chr15-reg8232
chr2	113885634	113886374	chr15-reg8234
chr2	113887653	113888635	chr15-reg8237
chr4	43528892	43529895	chr9-reg20370
chr4	43532840	43533533	chr9-reg20379
chr4	43534323	43534805	chr9-reg20381
chr4	43534805	43535546	chr9-reg20382
chr4	43536226	43537914	chr9-reg20384
chr4	43538071	43539152	chr9-reg20385
chr4	43542851	43543583	chr9-reg20389
chr4	43543735	43544831	chr9-reg20392
chr7	31758326	31759559	chr19-reg30045
chr7	31757231	31757481	chr19-reg30047
chr7	31756442	31756822	chr19-reg30049
chr7	31751947	31752785	chr19-reg30054
chr15	76846502	76847031	chr22-reg18299
chr15	76852643	76852918	chr22-reg18311
chr15	76853013	76853993	chr22-reg18312
chr15	76856341	76857069	chr22-reg18316
chr15	76857809	76859615	chr22-reg18319
chr7	29908592	29909983	chr19-reg32693
chr7	29901615	29902352	chr19-reg32699
chr9	119922237	119923263	chr3-reg27867
chr9	119923263	119923491	chr3-reg27868
chr9	119929692	119930844	chr3-reg27871
chr9	119930844	119933606	chr3-reg27873
chr11	101119107	101119748	chr17-reg36326
chr15	82161228	82161750	chr22-reg25688
chr15	82162504	82162762	chr22-reg25690
chr2	120285661	120286514	chr15-reg14632
chr2	120287679	120288865	chr15-reg14640
chr2	120292334	120292576	chr15-reg14650
chr2	120292576	120293426	chr15-reg14651
chr2	120294446	120294750	chr15-reg14655
chr2	120320983	120321600	chr15-reg14698
chr2	120323147	120324297	chr15-reg14702
chr2	120327928	120328122	chr15-reg14710
chr2	163212228	163213217	chr20-reg33813
chr2	163217694	163218761	chr20-reg33816
chr2	163218761	163219379	chr20-reg33817
chr2	163230766	163232041	chr20-reg33832
chr2	121239075	121239774	chr15-reg15780
chr11	5703691	5703983	chr7-reg33750
chr2	164601998	164602801	chr20-reg35557
chr2	164604135	164605162	chr20-reg35565
chr2	164605165	164605875	chr20-reg35566
chr2	164606681	164607701	chr20-reg35568
chr2	164609585	164610747	chr20-reg35572
chr5	69933867	69934954	chr4-reg30254
chr10	77890184	77890422	chr21-reg21339
chr17	44918954	44920119	chr6-reg42015
chr17	44913389	44915061	chr6-reg42025
chr7	19994719	19997498	chr19-reg39658
chr9	110666800	110667896	chr3-reg34399
chr9	110666404	110666800	chr3-reg34400
chr9	110665501	110666248	chr3-reg34401
chr9	110664142	110665306	chr3-reg34403
chr9	110662085	110663629	chr3-reg34405
chr18	74375493	74375748	chr18-reg31132
chr7	52764549	52765075	chr19-reg43606
chr7	52594287	52595571	chr19-reg43927
chr7	52253080	52254082	chr19-reg44555
chr14	33500479	33501020	chr10-reg34431
chr14	33499765	33500479	chr10-reg34432
chr14	33497258	33499595	chr10-reg34434
chr14	33496386	33497258	chr10-reg34435
chr7	51779959	51781031	chr19-reg45485
chr7	51777777	51778200	chr19-reg45490
chr7	51558822	51559910	chr19-reg45806
chr11	12357442	12357982	chr7-reg39770
chr11	12358379	12358788	chr7-reg39772
chr11	12358788	12359453	chr7-reg39773
chr11	12360185	12360905	chr7-reg39775
chr11	12362368	12362997	chr7-reg39780
chr11	12363438	12364684	chr7-reg39782
chr11	12373439	12374188	chr7-reg39794
chr14	32024723	32025568	chr3-reg40166
chr14	32021564	32022988	chr3-reg40171
chr4	108507461	108508585	chr1-reg53881
chr4	108504499	108507364	chr1-reg53882
chr19	31839312	31840274	chr10-reg35834
chr19	31836633	31839046	chr10-reg35835
chr19	31736608	31737590	chr10-reg35895
chr19	31735272	31736186	chr10-reg35897
chr19	31733115	31734047	chr10-reg35901
chr19	31729787	31730771	chr10-reg35903
chr7	3423157	3423657	chr19-reg48536
chr7	3424220	3425421	chr19-reg48538
chr7	3426770	3427655	chr19-reg48541
chr7	3429503	3431155	chr19-reg48544
chr7	4497913	4499490	chr19-reg49938
chr7	4915169	4916314	chr19-reg50373
chr7	4917414	4917800	chr19-reg50377
chr7	4918695	4918941	chr19-reg50379
chr7	4922237	4922701	chr19-reg50387
chr7	4922770	4923775	chr19-reg50389
chr4	3501460	3502172	chr8-reg37128
chr10	127474519	127474772	chr12-reg40283
chr10	127472313	127473546	chr12-reg40285
chr2	84659065	84659716	chr11-reg35781
chr2	84656673	84656971	chr11-reg35785
chr2	84652637	84653072	chr11-reg35791
chr2	84651990	84652637	chr11-reg35792
chr2	84573592	84576100	chr11-reg35901
chr2	84566659	84567903	chr11-reg35910
chr2	84555832	84556738	chr11-reg35916
chr2	84553787	84554855	chr11-reg35919
chr2	84550704	84551693	chr11-reg35924
chr2	84548293	84549142	chr11-reg35928
chr2	84500211	84500609	chr11-reg35998
chr2	84498898	84499837	chr11-reg36000
chr2	84497969	84498087	chr11-reg36002
chr2	84488223	84491408	chr11-reg36005
chr2	84486933	84487692	chr11-reg36007
chr2	84485267	84486337	chr11-reg36009
chr2	84482480	84482928	chr11-reg36011
chr10	126938579	126939253	chr12-reg40894
chr10	126935964	126936721	chr12-reg40898
chr4	6277522	6278299	chr8-reg38908
chr4	6278299	6282638	chr8-reg38909
chr4	6283137	6285102	chr8-reg38911
chr4	6293101	6294021	chr8-reg38916
chr4	6294021	6295381	chr8-reg38917
chr19	11929378	11930269	chr11-reg37107
chr19	11892079	11893181	chr11-reg37115
chr19	11891485	11892079	chr11-reg37116
chr19	11889348	11890327	chr11-reg37118
chr19	11887795	11888632	chr11-reg37121
chr19	11885174	11886642	chr11-reg37123
chr4	98786721	98787415	chr1-reg63169
chr4	98788971	98789558	chr1-reg63174
chr10	122122131	122123236	chr12-reg44146
chr10	122119087	122121199	chr12-reg44148
chr10	122116486	122117778	chr12-reg44152
chr9	66014423	66015361	chr15-reg30983
chr9	66013242	66014122	chr15-reg30986
chr9	66006135	66006581	chr15-reg30996
chr9	66001778	66002022	chr15-reg31005
chr9	66000896	66001778	chr15-reg31006
chr9	65999743	66000629	chr15-reg31008
chr11	107577705	107579160	chr17-reg58034
chr11	107575807	107576290	chr17-reg58037
chr11	107574832	107575340	chr17-reg58039
chr11	107568989	107569993	chr17-reg58047
chr11	107567165	107567558	chr17-reg58050
chr11	107566116	107567090	chr17-reg58051
chr19	4876333	4877235	chr11-reg44636
chr19	4874248	4875167	chr11-reg44638
chr6	97192372	97193586	chr3-reg53149
chr6	97194473	97195256	chr3-reg53151
chr6	97195488	97196218	chr3-reg53153
chr6	97201215	97201920	chr3-reg53158
chr6	97202571	97203394	chr3-reg53160
chr6	97205658	97206885	chr3-reg53162
chr6	97209948	97210331	chr3-reg53166
chr6	97427617	97428444	chr3-reg53377
chr6	97428444	97429414	chr3-reg53378
chr6	97435557	97436696	chr3-reg53385
chr6	97436696	97437417	chr3-reg53386
chr6	97442050	97442848	chr3-reg53395
chr6	97444712	97446259	chr3-reg53399
chrX	97934864	97937703	chrX-reg28893
chrX	97961825	97963410	chrX-reg28901
chrX	97963767	97965835	chrX-reg28902
chrX	97965835	97966391	chrX-reg28903
chrX	97966391	97966953	chrX-reg28904
chrX	97968853	97969410	chrX-reg28910
chrX	97970283	97971145	chrX-reg28913
chrX	97972203	97974013	chrX-reg28917
chrX	77778886	77779806	chr16-reg47502
chrX	77779806	77780608	chr16-reg47503
chr8	109959874	109961438	chr16-reg47505
chr8	109967739	109968891	chr16-reg47512
chr8	110065960	110066862	chr16-reg47641
chr8	110068108	110069343	chr16-reg47645
chr8	110069736	110070456	chr16-reg47647
chr8	110070573	110071639	chr16-reg47649
chr8	110073435	110073680	chr16-reg47657
chr8	110074416	110075370	chr16-reg47661
chr8	110075419	110076176	chr16-reg47663
chrX	98643745	98644511	chrX-reg29342
chrX	98644575	98644799	chrX-reg29343
chrX	99693655	99695123	chrX-reg30173
chrX	99700403	99701493	chrX-reg30180
chr7	107647991	107648707	chr11-reg52916
chr7	107647425	107647744	chr11-reg52918
chr7	107646958	107647159	chr11-reg52920
chr7	107642825	107644681	chr11-reg52927
chr7	107641198	107642740	chr11-reg52929
chr18	9917236	9917749	chr11-reg52938
chr7	107629190	107630004	chr11-reg52958
chr7	107622038	107622236	chr11-reg52964
chr7	107619957	107620628	chr11-reg52967
chr7	107617679	107618489	chr11-reg52971
chr7	107617344	107617676	chr11-reg52973
chr7	107615582	107616267	chr11-reg52977
chr7	107613877	107614687	chr11-reg52980
chr12	85259311	85260407	chr14-reg34738
chr12	85261309	85263594	chr14-reg34741
chr13	98014304	98014938	chr5-reg43296
chr12	85269667	85270704	chr14-reg34754
chr13	98013095	98014231	chr5-reg43298
chr12	85273292	85275008	chr14-reg34756
chr13	98009937	98010959	chr5-reg43304
chr13	98007871	98008879	chr5-reg43307
chr6	83486934	83487235	chr2-reg57412
chr6	83485827	83486866	chr2-reg57414
chr6	83485123	83485550	chr2-reg57416
chr6	83481692	83482618	chr2-reg57418
chr9	58164487	58165455	chr15-reg41020
chr9	58162142	58163993	chr15-reg41022
chr9	58157675	58158561	chr15-reg41027
chr9	58155725	58156636	chr15-reg41029
chr9	58154133	58154740	chr15-reg41032
chr9	58152985	58153663	chr15-reg41034
chr9	58152553	58152985	chr15-reg41035
chr9	58151451	58152430	chr15-reg41037
chr12	85657125	85658921	chr14-reg35160
chr12	85658921	85659459	chr14-reg35161
chr11	116711224	116713341	chr17-reg67999
chr6	82994578	82995775	chr2-reg58210
chr6	82993968	82994578	chr2-reg58211
chr14	21478130	21478921	chr10-reg49482
chr14	21481687	21482515	chr10-reg49485
chr14	21483703	21484384	chr10-reg49489
chr14	35167443	35167847	chr10-reg49503
chr14	35169121	35170511	chr10-reg49506
chr12	86937168	86941396	chr14-reg36789
chr12	86941489	86942893	chr14-reg36791
chr12	86943022	86944220	chr14-reg36793
chr12	86945614	86945976	chr14-reg36797
chr12	86948431	86949091	chr14-reg36802
chr12	86949378	86950344	chr14-reg36805
chr12	86951007	86951893	chr14-reg36807
chr12	86953068	86953807	chr14-reg36810
chr11	117634832	117635535	chr17-reg69669
chr11	117826497	117828046	chr17-reg69969
chr11	117829544	117831279	chr17-reg69972
chr11	117832253	117832543	chr17-reg69977
chr11	117835701	117836604	chr17-reg69979
chr11	117836678	117837893	chr17-reg69981
chr11	117851038	117852170	chr17-reg70004
chr11	117852942	117854141	chr17-reg70006
chr11	117854343	117855148	chr17-reg70008
chr14	22514478	22515093	chr10-reg50717
chr14	22515642	22517019	chr10-reg50719
chr14	22518360	22519204	chr10-reg50723
chr14	22522298	22523678	chr10-reg50729
chr11	118274258	118274695	chr17-reg70869
chr11	118276968	118278140	chr17-reg70877
chr11	118279554	118280871	chr17-reg70881
chr11	118284816	118285854	chr17-reg70889
chr5	93026580	93028545	chr4-reg44183
chr5	93031014	93032134	chr4-reg44187
chr5	93032363	93033066	chr4-reg44188
chr5	93033125	93033907	chr4-reg44190
chr5	93035026	93035808	chr4-reg44193
chr13	93915023	93915420	chr5-reg47060
chr13	93912441	93913522	chr5-reg47065
chr13	93908579	93909674	chr5-reg47070
chr13	93907017	93907811	chr5-reg47072
chr13	93906098	93906574	chr5-reg47074
chr13	93903493	93905177	chr5-reg47077
chr10	106940416	106941253	chr12-reg55327
chr10	106940025	106940416	chr12-reg55328
chr10	106938688	106939219	chr12-reg55331
chr10	106937728	106938659	chr12-reg55333
chr10	106936308	106937112	chr12-reg55335
chr10	106932878	106933678	chr12-reg55339
chr10	106930957	106931241	chr12-reg55342
chr6	71212775	71213202	chr2-reg64996
chr6	71212198	71212775	chr2-reg64997
chr6	71209596	71210575	chr2-reg65000
chr6	71204395	71205607	chr2-reg65005
chr6	71198294	71199121	chr2-reg65008
chr14	35403047	35403838	chr10-reg59409
chr14	35402416	35403047	chr10-reg59410
chr14	35401655	35402416	chr10-reg59411
chr14	35400922	35401562	chr10-reg59412
chr14	35399181	35399614	chr10-reg59415
chr14	35398606	35399181	chr10-reg59417
chr14	35397157	35398042	chr10-reg59420
chr14	35395886	35396477	chr10-reg59422
chr8	125780765	125781380	chr16-reg67045
chr4	33119944	33120988	chr6-reg62867
chr4	33118591	33119591	chr6-reg62869
chr4	33117144	33117643	chr6-reg62872
chr4	33110970	33111782	chr6-reg62877
chr19	36192189	36192323	chr10-reg62433
chr19	36194271	36195046	chr10-reg62438
chr19	36197128	36197902	chr10-reg62440
chr19	36197902	36198970	chr10-reg62441
chr19	36201019	36201918	chr10-reg62444
chr19	36202365	36202844	chr10-reg62446
chr19	36203468	36204102	chr10-reg62448
chr12	104569708	104570226	chr14-reg50407
chr12	104570226	104570557	chr14-reg50408
chr12	104572287	104572473	chr14-reg50413
chr12	104572556	104573058	chr14-reg50414
chr12	104573518	104574019	chr14-reg50416
chr12	104574186	104574801	chr14-reg50417
chr12	104574801	104575733	chr14-reg50418
chr12	104575780	104576286	chr14-reg50420
chr12	104576453	104578502	chr14-reg50421
chr12	104578767	104579904	chr14-reg50423
chr12	104582617	104583513	chr14-reg50429
chr12	104584071	104584657	chr14-reg50431
chr12	104584787	104585998	chr14-reg50433
chr13	62955685	62956263	chr9-reg44014
chr13	62959657	62960295	chr9-reg44026
chr13	62962222	62962589	chr9-reg44034
chr13	62965221	62965757	chr9-reg44037
chr1	36586093	36587306	chr2-reg67902
chr1	36587670	36588390	chr2-reg67904
chr1	36589245	36589425	chr2-reg67909
chr1	36591282	36591732	chr2-reg67913
chr1	36592553	36593487	chr2-reg67916
chr3	116687908	116688769	chr1-reg86781
chr3	116685107	116686438	chr1-reg86783
chr3	116684461	116685107	chr1-reg86784
chr3	116672576	116675264	chr1-reg86788
chr3	116669817	116670912	chr1-reg86793
chr3	116667151	116667966	chr1-reg86797
chr3	116662434	116663077	chr1-reg86803
chr3	116265022	116266452	chr1-reg87213
chr5	137503920	137506855	chr7-reg67532
chr5	137500183	137501057	chr7-reg67538
chr10	88068686	88069628	chr12-reg67979
chr10	88067670	88068427	chr12-reg67981
chr10	88063157	88063931	chr12-reg67987
chr10	88062672	88063157	chr12-reg67988
chr1	40861810	40862600	chr2-reg73332
chr1	40863914	40864466	chr2-reg73335
chr1	40872799	40873528	chr2-reg73338
chr15	41701214	41701948	chr8-reg68178
chr15	41702659	41702976	chr8-reg68180
chr15	41702991	41703805	chr8-reg68182
chr3	108024706	108025099	chr1-reg91875
chr3	108023632	108023968	chr1-reg91878
chr3	108023074	108023632	chr1-reg91879
chr3	108022236	108023074	chr1-reg91880
chr6	14696902	14697793	chr7-reg76316
chr6	14702005	14702992	chr7-reg76318
chr6	14703273	14704150	chr7-reg76320
chr6	14705246	14705798	chr7-reg76322
chr6	14708167	14708917	chr7-reg76326
chr8	13252927	13253295	chr13-reg57377
chr8	13254028	13254523	chr13-reg57380
chr3	102880547	102881108	chr1-reg96879
chr3	102877546	102877922	chr1-reg96883
chr3	102873316	102873985	chr1-reg96890
chr19	56462286	56463054	chr10-reg80348
chr19	56464367	56465690	chr10-reg80354
chr19	56466482	56467464	chr10-reg80356
chr3	101897542	101898361	chr1-reg97807
chr3	101893893	101894923	chr1-reg97809
chr3	101890930	101892004	chr1-reg97818
chr3	101889415	101890561	chr1-reg97820
chr3	101886021	101886236	chr1-reg97824
chr3	101885429	101885861	chr1-reg97825
chr10	51746356	51746847	chr6-reg78494
chr10	51749225	51750039	chr6-reg78501
chr10	53055783	53056765	chr6-reg79188
chr10	53056991	53057943	chr6-reg79190
chr9	44191950	44192191	chr11-reg83252
chr9	44187297	44188602	chr11-reg83261
chrX	35664211	35665687	chrX-reg44089
chrX	35666189	35667443	chrX-reg44091
chrX	35669506	35670166	chrX-reg44094
chrX	35670704	35671656	chrX-reg44096
chrX	35672435	35673521	chrX-reg44098
chrX	35674615	35675689	chrX-reg44101
chrX	35676503	35677454	chrX-reg44105
chr16	36989879	36991000	chr3-reg80506
chr16	35871439	35872293	chr3-reg81313
chr16	35869950	35871252	chr3-reg81314
chr16	35868992	35869457	chr3-reg81316
chr16	35864602	35865204	chr3-reg81320
chr6	24536642	24537438	chr7-reg81716
chr6	24541634	24542129	chr7-reg81723
chr6	24543535	24545799	chr7-reg81725
chr6	24547102	24547882	chr7-reg81727
chr6	24549593	24550168	chr7-reg81731
chr6	24550663	24551488	chr7-reg81733
chr6	24552127	24553059	chr7-reg81736
chr6	88577231	88577963	chr3-reg86887
chr6	88576358	88576695	chr3-reg86890
chr6	88573092	88574029	chr3-reg86892
chr6	88564985	88565914	chr3-reg86898
chr6	88562559	88563887	chr3-reg86900
chr9	31728130	31729437	chr11-reg92912
chr9	31726442	31727918	chr11-reg92914
chr9	31723617	31724269	chr11-reg92919
chr9	31721706	31723599	chr11-reg92921
chr9	31720676	31721625	chr11-reg92923
chr9	31714926	31715335	chr11-reg92933
chr9	31714112	31714926	chr11-reg92934
chr18	44493257	44494219	chr5-reg80874
chr18	44494837	44495756	chr5-reg80876
chr18	44498223	44499276	chr5-reg80879
chr10	17515289	17517822	chr6-reg92642
chr10	17511248	17514400	chr6-reg92644
chr6	47757466	47758173	chr7-reg99724
chr6	47761825	47763215	chr7-reg99735
chr6	47763303	47764388	chr7-reg99736
chr18	60751413	60752400	chr5-reg92206
chr3	95330347	95333359	chr1-reg105585
chr3	94933032	94933551	chr1-reg105991
chr3	94931833	94932174	chr1-reg105995
chr3	94928922	94929349	chr1-reg106003
chr3	94926854	94928255	chr1-reg106005
chr2	52184997	52185555	chr2-reg103773
chr2	52190552	52191784	chr2-reg103781
chrX	71485889	71486441	chrX-reg57358
chrX	71488505	71491402	chrX-reg57366
chr17	7189462	7190106	chr6-reg113990
chr17	7188273	7188487	chr6-reg113994
chr1	167701669	167702778	chr1-reg120352
chr1	167700117	167700695	chr1-reg120356
chr2	67016056	67016924	chr2-reg112767
chr2	67021650	67022517	chr2-reg112771
chr2	67022934	67023134	chr2-reg112772
chr2	67023134	67024500	chr2-reg112773
chr17	26911861	26913605	chr5-reg108503
chr17	26913605	26915004	chr5-reg108504
chr2	73412688	73413110	chr2-reg118908
chr2	73417214	73418301	chr2-reg118914
chr2	73418344	73419349	chr2-reg118915
chr2	73421571	73422396	chr2-reg118924
chr2	73423031	73424938	chr2-reg118927
chr2	73424938	73426112	chr2-reg118928
chr8	55643274	55644153	chr4-reg97898
chr8	55634842	55635797	chr4-reg97904
chr8	55633365	55634312	chr4-reg97906
chr2	76509905	76510250	chr2-reg121669
chr1	53119672	53120648	chr2-reg128278
chr1	53118985	53119553	chr2-reg128280
chr1	53116975	53118612	chr2-reg128281
chr1	146098181	146099460	chr1-reg137862
chr1	146097373	146098163	chr1-reg137863
chr1	146096167	146097123	chr1-reg137865
chr1	146093580	146094527	chr1-reg137869
chr1	146092702	146093319	chr1-reg137871
chr1	137949825	137950570	chr1-reg143042
chr1	137948721	137949477	chr1-reg143044
chr1	137943920	137944164	chr1-reg143055
chr1	137941637	137942638	chr1-reg143059
chr1	137696935	137697837	chr1-reg143469
chr1	137695584	137696935	chr1-reg143471
chr1	137694998	137695584	chr1-reg143472
chr1	137692993	137693971	chr1-reg143475
chr1	137690881	137691931	chr1-reg143477
chr1	137686918	137687406	chr1-reg143484
chr1	66981149	66981849	chr2-reg142227
chr1	66981852	66982665	chr2-reg142228
chr1	66986319	66987187	chr2-reg142230
chr1	66990232	66990985	chr2-reg142232
chr1	66991479	66992265	chr2-reg142234
chr1	66997377	66997974	chr2-reg142236
chr1	66997974	67000789	chr2-reg142237
chr1	67003711	67004713	chr2-reg142241
chr1	67006866	67007825	chr2-reg142243
chr1	75345540	75346394	chr2-reg149255
chr1	75355955	75356992	chr2-reg149261
chr1	75357577	75358322	chr2-reg149262
chr1	75361040	75361865	chr2-reg149271
chr8	126417597	126420114	chr1-reg168373
chr13	12431097	12431796	chr1-reg175213
chr13	12429889	12431097	chr1-reg175214
chr13	12428037	12429341	chr1-reg175216
chr13	12426634	12427551	chr1-reg175218
chr13	12425724	12426382	chr1-reg175220

## Sheet: CAO_2010__myotubes_MYOD_mm9
MyOD1 chip-seq regions foudn in myotubes from Cao et al. 2010 Genome-wide MyoD Binding in Skeletal Muscle Cells: A Potential for Broad Cellular Reprogramming
https://homes.cs.washington.edu/~ruzzo/papers/DevCell/2010a/
Chromosome	Start position	End position
chr1	5010890	5011504
chr1	5073017	5073378
chr1	6204557	6205278
chr1	6406489	6406798
chr1	6809960	6810337
chr1	7078589	7079357
chr1	7196205	7196575
chr1	7387355	7387970
chr1	8310473	8310949
chr1	8314045	8314368
chr1	9538020	9538358
chr1	9618448	9618808
chr1	9631376	9631656
chr1	9639287	9639743
chr1	9737818	9738205
chr1	9933965	9934429
chr1	10029592	10030357
chr1	10221500	10221880
chr1	10561003	10561316
chr1	10870502	10870835
chr1	12231887	12232223
chr1	12281805	12282492
chr1	12602101	12602604
chr1	12613223	12613678
chr1	12682366	12682777
chr1	12708154	12708490
chr1	12744729	12745056
chr1	12750800	12751072
chr1	13226335	13226861
chr1	13230399	13230898
chr1	13302007	13302319
chr1	13375430	13375778
chr1	13417445	13418202
chr1	13562457	13562950
chr1	13579041	13579482
chr1	13579625	13580405
chr1	13650051	13650714
chr1	13655062	13655525
chr1	13673028	13673446
chr1	13838867	13839140
chr1	14001627	14001972
chr1	14294675	14294997
chr1	14300251	14300491
chr1	14581005	14581332
chr1	14745250	14745535
chr1	14760638	14760972
chr1	15595607	15595922
chr1	15669253	15669559
chr1	15700607	15700961
chr1	16095642	16096220
chr1	16099410	16099734
chr1	16221697	16222098
chr1	16334873	16335189
chr1	16577109	16577450
chr1	16616115	16616424
chr1	16770032	16770385
chr1	16811281	16811641
chr1	16986669	16987139
chr1	16991375	16991739
chr1	17044008	17044340
chr1	17075231	17075594
chr1	17087718	17088164
chr1	17527647	17527968
chr1	17645779	17646168
chr1	20048314	20048795
chr1	20544527	20544772
chr1	20548468	20549007
chr1	20614526	20615063
chr1	20623351	20624091
chr1	20645037	20645624
chr1	20656314	20656697
chr1	20657578	20658199
chr1	20659778	20660353
chr1	20660830	20661451
chr1	20668015	20668490
chr1	20681440	20681918
chr1	20861005	20861447
chr1	20913215	20913532
chr1	20941629	20941979
chr1	20992316	20992560
chr1	20998949	20999422
chr1	21004523	21004953
chr1	21018130	21018483
chr1	21023805	21024049
chr1	21030878	21031380
chr1	21042015	21042442
chr1	21042643	21043232
chr1	21069281	21069715
chr1	22601735	22602007
chr1	23389868	23390350
chr1	24075696	24076095
chr1	24080708	24081022
chr1	24106989	24107477
chr1	24293202	24293582
chr1	24371715	24371982
chr1	24478183	24478622
chr1	24546751	24547036
chr1	24556886	24557247
chr1	24560350	24560682
chr1	24757118	24757470
chr1	30930304	30930970
chr1	31108357	31108833
chr1	33540067	33540408
chr1	33584255	33584560
chr1	33650832	33651194
chr1	33726404	33726751
chr1	33730105	33730458
chr1	33786608	33786999
chr1	33845355	33845686
chr1	33871140	33871508
chr1	33964663	33965110
chr1	33999539	33999937
chr1	34067844	34068611
chr1	34082678	34083137
chr1	34098176	34098686
chr1	34100243	34100525
chr1	34131758	34132043
chr1	34151976	34152352
chr1	34167785	34168294
chr1	34176893	34177218
chr1	34177943	34178396
chr1	34184540	34185025
chr1	34207560	34207828
chr1	34241227	34241524
chr1	34432994	34433336
chr1	34444564	34445109
chr1	34453163	34453473
chr1	34573483	34573813
chr1	34858636	34859074
chr1	34885738	34886120
chr1	34899655	34900101
chr1	34906601	34906941
chr1	35862343	35863062
chr1	35936397	35937037
chr1	36087100	36087905
chr1	36125053	36126072
chr1	36127199	36127491
chr1	36175189	36175523
chr1	36189919	36190227
chr1	36300941	36301318
chr1	36364510	36365124
chr1	36365359	36365788
chr1	36366148	36366643
chr1	36380885	36381336
chr1	36382956	36383316
chr1	36526511	36527436
chr1	36528254	36528921
chr1	36549101	36549623
chr1	36554005	36554637
chr1	36568367	36569827
chr1	36580284	36580968
chr1	36592604	36593276
chr1	36607325	36607732
chr1	36614575	36615240
chr1	36620039	36620511
chr1	36620644	36621548
chr1	36629018	36629435
chr1	36636812	36637548
chr1	36661617	36662007
chr1	36688736	36689373
chr1	36691126	36691410
chr1	36693297	36693775
chr1	36694278	36694640
chr1	36703092	36703511
chr1	36704362	36704901
chr1	36741017	36741293
chr1	36766644	36767013
chr1	36853612	36853895
chr1	36917351	36917693
chr1	37053444	37053741
chr1	37138462	37139032
chr1	37179007	37179553
chr1	37364432	37364867
chr1	37377253	37377612
chr1	37398793	37399117
chr1	37402426	37402768
chr1	37412323	37412658
chr1	37695974	37696328
chr1	37753830	37754234
chr1	37922077	37922433
chr1	37947038	37947544
chr1	38053696	38054006
chr1	38054679	38055134
chr1	38186421	38187191
chr1	38279082	38279555
chr1	38485677	38486054
chr1	38507508	38508046
chr1	39036736	39037121
chr1	39044341	39044696
chr1	39049171	39049850
chr1	39135829	39136142
chr1	39162382	39162722
chr1	39163514	39163939
chr1	39338508	39339354
chr1	39340206	39340548
chr1	39345331	39345633
chr1	39384504	39384738
chr1	39437720	39438329
chr1	39453231	39453545
chr1	39506214	39506725
chr1	39507281	39507605
chr1	39514620	39515163
chr1	39534794	39535643
chr1	39669915	39670250
chr1	39744146	39744569
chr1	39748519	39749223
chr1	39803169	39803806
chr1	39806494	39806891
chr1	39811405	39812003
chr1	39818895	39819176
chr1	39897679	39898038
chr1	39951913	39952401
chr1	39980291	39980621
chr1	39998070	39998397
chr1	40022308	40022721
chr1	40310751	40311355
chr1	40320590	40320886
chr1	40329122	40329408
chr1	40338817	40339154
chr1	40339302	40339810
chr1	40340887	40341217
chr1	40384470	40384819
chr1	40643572	40643934
chr1	40715854	40716157
chr1	40724152	40724653
chr1	40771807	40772239
chr1	40822402	40822774
chr1	40862270	40862646
chr1	40892395	40892635
chr1	40897224	40897885
chr1	40912153	40912521
chr1	42820248	42820713
chr1	42907773	42908170
chr1	43148925	43149819
chr1	43155078	43155817
chr1	43184748	43185545
chr1	43193335	43193887
chr1	43198264	43198810
chr1	43204418	43204715
chr1	43220633	43221245
chr1	43279928	43280271
chr1	43282681	43282994
chr1	43294638	43295095
chr1	43301888	43302203
chr1	43307124	43307406
chr1	43316661	43317650
chr1	43415075	43415389
chr1	43424288	43424698
chr1	43451933	43452278
chr1	43502116	43502446
chr1	43531254	43531638
chr1	43650402	43650661
chr1	43755346	43755729
chr1	43756074	43756421
chr1	43779216	43779693
chr1	43867099	43867439
chr1	43875933	43876315
chr1	43884367	43885069
chr1	43990397	43990889
chr1	44079528	44079958
chr1	44862116	44862487
chr1	45368335	45368671
chr1	45894569	45894980
chr1	46024270	46024513
chr1	46909972	46910567
chr1	51027766	51028083
chr1	51056660	51056994
chr1	51205395	51205752
chr1	51256380	51256709
chr1	51300047	51300618
chr1	51346599	51347184
chr1	51390609	51390935
chr1	51443731	51444002
chr1	51534997	51535556
chr1	51700509	51700831
chr1	51761525	51761816
chr1	51791506	51791798
chr1	51805235	51805540
chr1	51972605	51973210
chr1	52170500	52170955
chr1	52476227	52476585
chr1	52511417	52512109
chr1	52557355	52557744
chr1	52783449	52783932
chr1	52820865	52821172
chr1	52844078	52844546
chr1	53028728	53029123
chr1	53142223	53142523
chr1	53841466	53842229
chr1	53880951	53881321
chr1	53885939	53886342
chr1	53902766	53903207
chr1	53903211	53903625
chr1	53913440	53913976
chr1	54383507	54383802
chr1	54887008	54887620
chr1	54932000	54932296
chr1	54979547	54979864
chr1	55109423	55110136
chr1	55187757	55188865
chr1	55190279	55190574
chr1	55258635	55259034
chr1	55259072	55259528
chr1	55274165	55274422
chr1	55279110	55279477
chr1	55293865	55294563
chr1	55462410	55463050
chr1	55510958	55511359
chr1	55580799	55581232
chr1	55585584	55585936
chr1	55624805	55625016
chr1	55629505	55629905
chr1	55931039	55931340
chr1	56146253	56146667
chr1	56890865	56891176
chr1	56919649	56920051
chr1	57281583	57281996
chr1	57434165	57434801
chr1	57444665	57445166
chr1	57486598	57486914
chr1	57493730	57494164
chr1	57567536	57568045
chr1	57690844	57691280
chr1	58088115	58088490
chr1	58297413	58297752
chr1	58357741	58357989
chr1	58360448	58360866
chr1	58799423	58799733
chr1	58801485	58801840
chr1	58966725	58967032
chr1	59176450	59176763
chr1	59219794	59220262
chr1	59251863	59252190
chr1	59441181	59441611
chr1	59466478	59466894
chr1	59474904	59475278
chr1	59479727	59480099
chr1	59483804	59484137
chr1	59490925	59491264
chr1	59495330	59495592
chr1	59496364	59496681
chr1	59507789	59508226
chr1	59521935	59522284
chr1	59532416	59532859
chr1	59572955	59573406
chr1	59599435	59599681
chr1	59670730	59671019
chr1	59790971	59791253
chr1	59820117	59820779
chr1	60065620	60065979
chr1	60237017	60237504
chr1	60400011	60400334
chr1	60623209	60624018
chr1	60629493	60629907
chr1	60791896	60792217
chr1	60882679	60883059
chr1	60973360	60973722
chr1	61260189	61260474
chr1	61685622	61686121
chr1	62463396	62463759
chr1	62565062	62565330
chr1	62636678	62637022
chr1	62753133	62753666
chr1	62778625	62778970
chr1	62826675	62827043
chr1	62830527	62831089
chr1	62834131	62834471
chr1	62872567	62872960
chr1	62874541	62875158
chr1	62885197	62885596
chr1	62907429	62907700
chr1	63023341	63023674
chr1	63237479	63237830
chr1	63245937	63246437
chr1	63285929	63286790
chr1	63299539	63299887
chr1	63312000	63312382
chr1	63441921	63442508
chr1	63580924	63581211
chr1	63674796	63675201
chr1	64168001	64168911
chr1	64242592	64242953
chr1	64272632	64273380
chr1	64579192	64579676
chr1	64655599	64656137
chr1	64656565	64656929
chr1	64662031	64662381
chr1	64663187	64663525
chr1	64664065	64664461
chr1	64670392	64670866
chr1	64782957	64783309
chr1	64784016	64784511
chr1	64831951	64832260
chr1	64834445	64834788
chr1	64851826	64852164
chr1	64898797	64899152
chr1	64995955	64996294
chr1	65034806	65035130
chr1	65179425	65179771
chr1	65225611	65225970
chr1	65264585	65264908
chr1	66735907	66736239
chr1	66747073	66747860
chr1	66862644	66863076
chr1	66968635	66969013
chr1	66969078	66969386
chr1	66987475	66987821
chr1	66997673	66998035
chr1	67003967	67004311
chr1	67031748	67032200
chr1	67085215	67085618
chr1	69274463	69274838
chr1	69294228	69294661
chr1	69550606	69550882
chr1	69630600	69630916
chr1	69706383	69706660
chr1	69733624	69734195
chr1	69754173	69754438
chr1	69848083	69848370
chr1	70182212	70182512
chr1	70303595	70303898
chr1	70772140	70772524
chr1	71044157	71044567
chr1	71052407	71052721
chr1	71146372	71146987
chr1	71439010	71439378
chr1	71440760	71441084
chr1	71603477	71603882
chr1	71772217	71772524
chr1	71813696	71814041
chr1	71871100	71871347
chr1	71897893	71898242
chr1	71934318	71934907
chr1	72132261	72132602
chr1	72251736	72252025
chr1	72261169	72261573
chr1	72301920	72302320
chr1	72356287	72356820
chr1	72447225	72447573
chr1	72465296	72465709
chr1	72475766	72476125
chr1	72497370	72497750
chr1	72638835	72639148
chr1	72639643	72640570
chr1	72655028	72655391
chr1	72655811	72656166
chr1	72719568	72719961
chr1	72829950	72830289
chr1	72843571	72844261
chr1	72861786	72862107
chr1	72862247	72862557
chr1	72870989	72871402
chr1	72871943	72872261
chr1	72894359	72894971
chr1	72910838	72911445
chr1	72916940	72917287
chr1	72992332	72992635
chr1	72997929	72998981
chr1	73006670	73007489
chr1	73012695	73013332
chr1	73015767	73016507
chr1	73017408	73017667
chr1	73035534	73035864
chr1	73087305	73087617
chr1	73101703	73102081
chr1	73199986	73200358
chr1	73215814	73216283
chr1	73288752	73289311
chr1	73331844	73332292
chr1	73401047	73401402
chr1	73407798	73408366
chr1	73464709	73465002
chr1	73732283	73732719
chr1	73783693	73784040
chr1	73804712	73805651
chr1	73818414	73818690
chr1	73867275	73867686
chr1	73870895	73871724
chr1	73961625	73962330
chr1	73997585	73998153
chr1	74002302	74002601
chr1	74012940	74013315
chr1	74045033	74045573
chr1	74048041	74048419
chr1	74075247	74075843
chr1	74081294	74081551
chr1	74095930	74096425
chr1	74171655	74172112
chr1	74182058	74182507
chr1	74254561	74254859
chr1	74295322	74295719
chr1	74296142	74296528
chr1	74322196	74322489
chr1	74340680	74341021
chr1	74341590	74342886
chr1	74343975	74344264
chr1	74363009	74363369
chr1	74378759	74379513
chr1	74431062	74431539
chr1	74433302	74433826
chr1	74437897	74438318
chr1	74443866	74444214
chr1	74467130	74467466
chr1	74585154	74585631
chr1	74634369	74634717
chr1	74634817	74635144
chr1	74647567	74648113
chr1	74793876	74794330
chr1	74795266	74796457
chr1	74800716	74801172
chr1	74806382	74806697
chr1	74836597	74837058
chr1	74843983	74844542
chr1	74846983	74847285
chr1	74849572	74850146
chr1	74852942	74853449
chr1	74853654	74853961
chr1	74854626	74855052
chr1	74901307	74901677
chr1	74939589	74939948
chr1	74995440	74995813
chr1	75086858	75087521
chr1	75121161	75121462
chr1	75175645	75177070
chr1	75214848	75215592
chr1	75227797	75228167
chr1	75313477	75314786
chr1	75340815	75341923
chr1	75355935	75356312
chr1	75356590	75357127
chr1	75358487	75358857
chr1	75366936	75367281
chr1	75367976	75368325
chr1	75376355	75377108
chr1	75389850	75390182
chr1	75395484	75395889
chr1	75396345	75396901
chr1	75396940	75397326
chr1	75404852	75405354
chr1	75410356	75410663
chr1	75444326	75444810
chr1	75445502	75445834
chr1	75447007	75447261
chr1	75463965	75464670
chr1	75473864	75474345
chr1	75502474	75503763
chr1	75528846	75529762
chr1	75545783	75546127
chr1	75546459	75546842
chr1	75551681	75552027
chr1	75552291	75552628
chr1	75552698	75553081
chr1	75555928	75556410
chr1	75585558	75585786
chr1	75605181	75605597
chr1	77399214	77399545
chr1	77457378	77457967
chr1	78178429	78178799
chr1	78213614	78214146
chr1	78359590	78359977
chr1	78432734	78433042
chr1	78528749	78529462
chr1	78533999	78534707
chr1	78534962	78535476
chr1	78535709	78536264
chr1	78607567	78607972
chr1	78653999	78654827
chr1	78691452	78691866
chr1	78730118	78730456
chr1	78741675	78742278
chr1	78807530	78807895
chr1	78848992	78849694
chr1	79313770	79314170
chr1	79397574	79397890
chr1	79772453	79772952
chr1	80015034	80015600
chr1	80072989	80073245
chr1	80217696	80218126
chr1	80221392	80221805
chr1	80753445	80753813
chr1	81628839	81629166
chr1	81723390	81723665
chr1	81736659	81736918
chr1	81741015	81741514
chr1	81752148	81752668
chr1	81791369	81791660
chr1	81791918	81792273
chr1	81883477	81883889
chr1	81910240	81910584
chr1	82254044	82254396
chr1	82286616	82286941
chr1	82287489	82287996
chr1	82313211	82313790
chr1	82316988	82317342
chr1	82322743	82323047
chr1	82332601	82333026
chr1	82630940	82631459
chr1	82984454	82984757
chr1	84356667	84357051
chr1	84414326	84414779
chr1	84467611	84467924
chr1	84503400	84503837
chr1	84836954	84837322
chr1	84846345	84846647
chr1	87660893	87661348
chr1	87662733	87663093
chr1	87690058	87690784
chr1	87878584	87878929
chr1	87914918	87915349
chr1	87951565	87951798
chr1	88001629	88002121
chr1	88008308	88008747
chr1	88153707	88154204
chr1	88165462	88165805
chr1	88181853	88182274
chr1	88196698	88197747
chr1	88197763	88198347
chr1	88264687	88265033
chr1	88330677	88331562
chr1	88331871	88332472
chr1	88337567	88337906
chr1	88339363	88339729
chr1	88344921	88345274
chr1	88367093	88367725
chr1	88400625	88401285
chr1	88401973	88402480
chr1	88405973	88406435
chr1	88407379	88408147
chr1	88413702	88413995
chr1	88422804	88423304
chr1	88424645	88425112
chr1	88508679	88508996
chr1	88552526	88552859
chr1	88574246	88574596
chr1	88575300	88575617
chr1	88650921	88651232
chr1	88654590	88655088
chr1	88873592	88873986
chr1	88897903	88898419
chr1	88937739	88938079
chr1	88947119	88947767
chr1	88947910	88948324
chr1	88967360	88967736
chr1	89038974	89039472
chr1	89072445	89072733
chr1	89081346	89081737
chr1	89087022	89087676
chr1	89100433	89100725
chr1	89101101	89101744
chr1	89102035	89102515
chr1	89142758	89143092
chr1	89167448	89167847
chr1	89197464	89197832
chr1	89223672	89224371
chr1	89383002	89383464
chr1	89388815	89389164
chr1	89490850	89491163
chr1	89503891	89504753
chr1	89564882	89565248
chr1	89698999	89699266
chr1	89733045	89733421
chr1	89743295	89743946
chr1	89744302	89744770
chr1	89751178	89751423
chr1	89777417	89777752
chr1	89797390	89797705
chr1	90151274	90151796
chr1	90164596	90164976
chr1	90173950	90174420
chr1	90239663	90240025
chr1	90258115	90258608
chr1	90315636	90316170
chr1	90362993	90363306
chr1	90370962	90371528
chr1	90372113	90372378
chr1	90374777	90375240
chr1	90536035	90536763
chr1	90554930	90555194
chr1	90588924	90589365
chr1	90598566	90599225
chr1	90654378	90654662
chr1	90660299	90660900
chr1	90661018	90661555
chr1	90682669	90683001
chr1	90763598	90764121
chr1	90787525	90788223
chr1	90805197	90805938
chr1	90820651	90821268
chr1	90832326	90832775
chr1	90854571	90854970
chr1	90908017	90908469
chr1	90951772	90952125
chr1	90956318	90956653
chr1	90960371	90960689
chr1	90966757	90967166
chr1	90983205	90983662
chr1	91010872	91011240
chr1	91013574	91014100
chr1	91016860	91017343
chr1	91067712	91068523
chr1	91125117	91125491
chr1	91148292	91148764
chr1	91175984	91176316
chr1	91212368	91212695
chr1	91229346	91229668
chr1	91304573	91304931
chr1	91309603	91310050
chr1	91351205	91351692
chr1	91351872	91352646
chr1	91367992	91368716
chr1	91405804	91406160
chr1	91406329	91406955
chr1	91410428	91410839
chr1	91417643	91418901
chr1	91432534	91432802
chr1	91434842	91436155
chr1	91441631	91442024
chr1	91451589	91452047
chr1	91467079	91467502
chr1	91476621	91477488
chr1	91477886	91478581
chr1	91499327	91499869
chr1	91534120	91534675
chr1	91539299	91539760
chr1	91621533	91621843
chr1	91660598	91660952
chr1	91672342	91672697
chr1	91767054	91767421
chr1	91901003	91901315
chr1	92007993	92008347
chr1	92053134	92053562
chr1	92058139	92058527
chr1	92058927	92060076
chr1	92060892	92061433
chr1	92111492	92111887
chr1	92115323	92115598
chr1	92124958	92125343
chr1	92134567	92134903
chr1	92157314	92157659
chr1	92169887	92170284
chr1	92231547	92231920
chr1	92234385	92234915
chr1	92267289	92267702
chr1	92274366	92274668
chr1	92293360	92293620
chr1	92325360	92325844
chr1	92337968	92338418
chr1	92350917	92351268
chr1	92368955	92369259
chr1	92382910	92383384
chr1	92394018	92394417
chr1	92403018	92403477
chr1	92410053	92410368
chr1	92530391	92530741
chr1	92547318	92547633
chr1	92566823	92567166
chr1	92573246	92573734
chr1	92619958	92620292
chr1	92630706	92631426
chr1	92654878	92655277
chr1	92671995	92672772
chr1	92806448	92806812
chr1	92864122	92864624
chr1	92870089	92870564
chr1	92871411	92871874
chr1	92895158	92895636
chr1	92919103	92919490
chr1	92919905	92920234
chr1	92928055	92928449
chr1	92928887	92929553
chr1	92935085	92935420
chr1	92936559	92936905
chr1	92948806	92950246
chr1	92957680	92958078
chr1	92961878	92962203
chr1	92989140	92989481
chr1	92995302	92995835
chr1	93077243	93077669
chr1	93106455	93106812
chr1	93113138	93113995
chr1	93128613	93128914
chr1	93144669	93145226
chr1	93146765	93147101
chr1	93209925	93210229
chr1	93226069	93226407
chr1	93233865	93234439
chr1	93248814	93249269
chr1	93252720	93253080
chr1	93265990	93266362
chr1	93269739	93270423
chr1	93295069	93295783
chr1	93304426	93304756
chr1	93308680	93309247
chr1	93309756	93310232
chr1	93310369	93311128
chr1	93347444	93347860
chr1	93355355	93355914
chr1	93380147	93380740
chr1	93382052	93382330
chr1	93436806	93437498
chr1	93472204	93472553
chr1	93497152	93497583
chr1	93591910	93592154
chr1	93605128	93605396
chr1	93719584	93720263
chr1	93816426	93817038
chr1	93843928	93844418
chr1	93855657	93855986
chr1	93912862	93913222
chr1	93951668	93952155
chr1	93995983	93996860
chr1	94023975	94024345
chr1	94026862	94027460
chr1	94073758	94074116
chr1	94076359	94077056
chr1	94099222	94099608
chr1	94180751	94181094
chr1	94193294	94193631
chr1	94237239	94237577
chr1	94237582	94237903
chr1	94239671	94240870
chr1	94244886	94245304
chr1	94275679	94276386
chr1	94325063	94325389
chr1	94414840	94415100
chr1	94534702	94535267
chr1	94545252	94545701
chr1	94572952	94573651
chr1	94579670	94580342
chr1	94595458	94596259
chr1	94599652	94600212
chr1	94600312	94601277
chr1	94604876	94605572
chr1	94637648	94638017
chr1	94648080	94648799
chr1	94669162	94669495
chr1	94672482	94673504
chr1	94679158	94680093
chr1	94683366	94684533
chr1	94684655	94684968
chr1	94686816	94687620
chr1	94710839	94711304
chr1	94712489	94712898
chr1	94727673	94728139
chr1	94729191	94729802
chr1	94735643	94736148
chr1	94766612	94766961
chr1	94771978	94772305
chr1	94773686	94774564
chr1	94775821	94776140
chr1	94803253	94804161
chr1	94808391	94808762
chr1	94911031	94911337
chr1	95036376	95036722
chr1	95062068	95062424
chr1	95080638	95081048
chr1	95123769	95124488
chr1	95147987	95148315
chr1	95154141	95154475
chr1	95202068	95202668
chr1	95239253	95239639
chr1	95240177	95240589
chr1	95269468	95269745
chr1	95285360	95285818
chr1	95375394	95375737
chr1	95408986	95409320
chr1	95530945	95531429
chr1	95531596	95532156
chr1	95532228	95532680
chr1	95576959	95577240
chr1	95583127	95583594
chr1	95651088	95651723
chr1	95700159	95700679
chr1	95721758	95722219
chr1	95931849	95932219
chr1	97164558	97165097
chr1	97210147	97210592
chr1	97236213	97236622
chr1	99511705	99512039
chr1	99557178	99557718
chr1	99666410	99666808
chr1	99873343	99873713
chr1	100065952	100066356
chr1	107208916	107209273
chr1	107328329	107328627
chr1	107331677	107331994
chr1	107710171	107710571
chr1	107803069	107803300
chr1	107890186	107890827
chr1	107960417	107960809
chr1	107962197	107962736
chr1	108060038	108060350
chr1	108068846	108069331
chr1	108097665	108098005
chr1	108098532	108098985
chr1	108123208	108123536
chr1	108250666	108251037
chr1	108283123	108283503
chr1	108299010	108299291
chr1	108301305	108301639
chr1	108324689	108325520
chr1	108523676	108524254
chr1	108656080	108656450
chr1	109942751	109943089
chr1	116570499	116570838
chr1	120207744	120208122
chr1	120256194	120256556
chr1	120305618	120306224
chr1	120307403	120307826
chr1	120341031	120341356
chr1	120341701	120341989
chr1	120342021	120342406
chr1	120375827	120376160
chr1	120380120	120380466
chr1	120823225	120823563
chr1	120873265	120873690
chr1	120879110	120879424
chr1	120930548	120930881
chr1	121005063	121005411
chr1	121016520	121016845
chr1	121020086	121020407
chr1	121022115	121022478
chr1	121149041	121149362
chr1	121153339	121153911
chr1	121301384	121301703
chr1	121390576	121390946
chr1	121401055	121401497
chr1	121421471	121421796
chr1	121437604	121438179
chr1	121537593	121537931
chr1	121733961	121734411
chr1	121760310	121760683
chr1	121791650	121791914
chr1	121799068	121799407
chr1	121931458	121931798
chr1	121932012	121932613
chr1	121933555	121933853
chr1	121935157	121935568
chr1	121941051	121941709
chr1	121951584	121952063
chr1	121967776	121968101
chr1	121977235	121977654
chr1	122017604	122017976
chr1	122093756	122094114
chr1	122141227	122141604
chr1	122142035	122142681
chr1	122161589	122162042
chr1	122271367	122271785
chr1	122568386	122568736
chr1	122667847	122668193
chr1	122712852	122713185
chr1	122818028	122818478
chr1	122971036	122971630
chr1	123091425	123091745
chr1	123123044	123123415
chr1	123224378	123224822
chr1	123263903	123264219
chr1	123368180	123368458
chr1	127286231	127286597
chr1	127316522	127316828
chr1	127332003	127332689
chr1	127404921	127405544
chr1	127457333	127458136
chr1	127705035	127705411
chr1	128381150	128381768
chr1	128399367	128399726
chr1	128493991	128494337
chr1	128522650	128523225
chr1	128552983	128553346
chr1	128557220	128557539
chr1	129116913	129117240
chr1	129235648	129236158
chr1	129245159	129245602
chr1	129438537	129438882
chr1	129670516	129671059
chr1	129730327	129730684
chr1	129842641	129842996
chr1	129999199	130000064
chr1	130000217	130000514
chr1	130038318	130038650
chr1	130066728	130067059
chr1	130256018	130256254
chr1	130340852	130341550
chr1	130368678	130369653
chr1	130403207	130403484
chr1	130405451	130406037
chr1	130429303	130429583
chr1	130463602	130464223
chr1	130487751	130488199
chr1	130583762	130584102
chr1	130683450	130684260
chr1	130729787	130730285
chr1	130753430	130754096
chr1	131602008	131602691
chr1	131734302	131734769
chr1	131764322	131764614
chr1	131841128	131841404
chr1	132358953	132359514
chr1	132485283	132485560
chr1	132881165	132881425
chr1	132935006	132935345
chr1	132957444	132957812
chr1	132959299	132959965
chr1	132975257	132975954
chr1	132982496	132982776
chr1	132986855	132987267
chr1	133034634	133035041
chr1	133049588	133049954
chr1	133080863	133081274
chr1	133092205	133092641
chr1	133106743	133107100
chr1	133135590	133135932
chr1	133242249	133242962
chr1	133243502	133243858
chr1	133256203	133256500
chr1	133256628	133256940
chr1	133328364	133328855
chr1	133333235	133333545
chr1	133362485	133362817
chr1	133445053	133445384
chr1	133476983	133477291
chr1	133586744	133587044
chr1	133608882	133609271
chr1	133620093	133620495
chr1	133636105	133636709
chr1	133647626	133648168
chr1	133651504	133652147
chr1	133667236	133667633
chr1	133691194	133691563
chr1	133717592	133717950
chr1	133751527	133751824
chr1	133989695	133990257
chr1	133992023	133992628
chr1	134017814	134019070
chr1	134024864	134025316
chr1	134048216	134048546
chr1	134096514	134096818
chr1	134097195	134097655
chr1	134187542	134187831
chr1	134188796	134189112
chr1	134195014	134195659
chr1	134215865	134216165
chr1	134230354	134230804
chr1	134231888	134232188
chr1	134242783	134243576
chr1	134250859	134251231
chr1	134251639	134252244
chr1	134267305	134267689
chr1	134280480	134281823
chr1	134286773	134287579
chr1	134288194	134288609
chr1	134313758	134314439
chr1	134606107	134606415
chr1	134662874	134663250
chr1	134748398	134748764
chr1	134749654	134750466
chr1	134777834	134778390
chr1	134814596	134815399
chr1	134936157	134936555
chr1	134965617	134966386
chr1	134968476	134968942
chr1	134980426	134980900
chr1	134984187	134984534
chr1	135000498	135000840
chr1	135067844	135068184
chr1	135077752	135078138
chr1	135118947	135119261
chr1	135122889	135123213
chr1	135362324	135362608
chr1	135367712	135368144
chr1	135521627	135522021
chr1	135559871	135560571
chr1	135592557	135592857
chr1	135661798	135662248
chr1	135673998	135674680
chr1	135685421	135685726
chr1	135695039	135695506
chr1	135721929	135722666
chr1	135730700	135731394
chr1	135739897	135740303
chr1	135752770	135753128
chr1	135788102	135788416
chr1	135789574	135790346
chr1	135797328	135797832
chr1	135804656	135805258
chr1	135814170	135814491
chr1	135837963	135838927
chr1	135957244	135958081
chr1	135967713	135968519
chr1	135969500	135969854
chr1	135973990	135974316
chr1	135974592	135974999
chr1	135989295	135990183
chr1	135993095	135993518
chr1	135996326	135996787
chr1	136056895	136057435
chr1	136057981	136058383
chr1	136089758	136090139
chr1	136090810	136091226
chr1	136091280	136092161
chr1	136092181	136093490
chr1	136140832	136142510
chr1	136162439	136162779
chr1	136172480	136172970
chr1	136179579	136180240
chr1	136182238	136182802
chr1	136185971	136186862
chr1	136187004	136187330
chr1	136188621	136188968
chr1	136193837	136194216
chr1	136199040	136199517
chr1	136203724	136204500
chr1	136217179	136217983
chr1	136229241	136229930
chr1	136230974	136231414
chr1	136235830	136236148
chr1	136270649	136271025
chr1	136308255	136308671
chr1	136311809	136312123
chr1	136408493	136409143
chr1	136415200	136415491
chr1	136548267	136548589
chr1	136755278	136755641
chr1	136806074	136806511
chr1	136834770	136835204
chr1	136851960	136852535
chr1	136986192	136986620
chr1	136987528	136987836
chr1	137007651	137008167
chr1	137025629	137026004
chr1	137028954	137029331
chr1	137063938	137064386
chr1	137080617	137081197
chr1	137114125	137114510
chr1	137180041	137180656
chr1	137221191	137221622
chr1	137243278	137243993
chr1	137263141	137263458
chr1	137271367	137272348
chr1	137275230	137275564
chr1	137326820	137327244
chr1	137332374	137332750
chr1	137363483	137364083
chr1	137382174	137382722
chr1	137420903	137421281
chr1	137427583	137428107
chr1	137431801	137432335
chr1	137438662	137439091
chr1	137441407	137441769
chr1	137451311	137451872
chr1	137460480	137460952
chr1	137461809	137462128
chr1	137464670	137465172
chr1	137487207	137487799
chr1	137522797	137523152
chr1	137540789	137541218
chr1	137556273	137556703
chr1	137558383	137558924
chr1	137564631	137565538
chr1	137566977	137567327
chr1	137572087	137572640
chr1	137577687	137578146
chr1	137584452	137585207
chr1	137594816	137595421
chr1	137595884	137596271
chr1	137611528	137611880
chr1	137625506	137626024
chr1	137628570	137628923
chr1	137637637	137638156
chr1	137660129	137660482
chr1	137662501	137663262
chr1	137667433	137668280
chr1	137675518	137676372
chr1	137690078	137690638
chr1	137691175	137691882
chr1	137710209	137710744
chr1	137718367	137718728
chr1	137730629	137731223
chr1	137732375	137733030
chr1	137749073	137749418
chr1	137761323	137761887
chr1	137789748	137790350
chr1	137815507	137815889
chr1	137819904	137820181
chr1	137822394	137822828
chr1	137826352	137826748
chr1	137838226	137838581
chr1	137840307	137840755
chr1	137845496	137845870
chr1	137886423	137887115
chr1	137894097	137894552
chr1	137904155	137904864
chr1	137935872	137936132
chr1	137937833	137938149
chr1	137946977	137947617
chr1	137948016	137948511
chr1	137949025	137949496
chr1	137962789	137963667
chr1	138032990	138033381
chr1	138034213	138034641
chr1	138035019	138035383
chr1	138070744	138071077
chr1	138124754	138125290
chr1	138149961	138150679
chr1	138212853	138213146
chr1	138226045	138226347
chr1	138242583	138242934
chr1	138311637	138312408
chr1	138352337	138352658
chr1	138440111	138440428
chr1	138455889	138456174
chr1	138509864	138510526
chr1	138521255	138521627
chr1	138579589	138579952
chr1	138580018	138580384
chr1	138601107	138601419
chr1	138621683	138622135
chr1	138823675	138823990
chr1	139271319	139271658
chr1	139472888	139473214
chr1	139870035	139870476
chr1	140222629	140222982
chr1	140404103	140404394
chr1	140438026	140438410
chr1	140492675	140493134
chr1	140516144	140516445
chr1	140859545	140860615
chr1	141070667	141070985
chr1	141089224	141089605
chr1	145371504	145371964
chr1	145549726	145550373
chr1	145624086	145624613
chr1	145751093	145751497
chr1	145851088	145851477
chr1	145932767	145933211
chr1	146025665	146026014
chr1	147783068	147783357
chr1	147804958	147805183
chr1	149190761	149191050
chr1	151793500	151793851
chr1	151936188	151936529
chr1	152239627	152240088
chr1	152327904	152328220
chr1	152553675	152553962
chr1	152909532	152909843
chr1	152926125	152926411
chr1	152978933	152979415
chr1	153075618	153075897
chr1	153097815	153098477
chr1	153192084	153192588
chr1	153564585	153565153
chr1	153602625	153603298
chr1	153693115	153693454
chr1	153806180	153806563
chr1	154050153	154050801
chr1	154383558	154383891
chr1	154403270	154403696
chr1	154487821	154488216
chr1	154534365	154534778
chr1	154892480	154892880
chr1	154939003	154939642
chr1	154954919	154955380
chr1	155004156	155004639
chr1	155040075	155040353
chr1	155049234	155049799
chr1	155112766	155113058
chr1	155155231	155156069
chr1	155192188	155192542
chr1	155334061	155334395
chr1	155348670	155349204
chr1	155403316	155403815
chr1	155482114	155482537
chr1	155488539	155489048
chr1	155512252	155512743
chr1	155514608	155515034
chr1	155550486	155551150
chr1	155551299	155551644
chr1	155551938	155552581
chr1	155580247	155580925
chr1	155593250	155593679
chr1	155746807	155747444
chr1	155753019	155753364
chr1	155816565	155817175
chr1	155965773	155966049
chr1	155997292	155997849
chr1	156003573	156003954
chr1	156004314	156004616
chr1	156022361	156022931
chr1	156830496	156830821
chr1	156888099	156888433
chr1	156897361	156897717
chr1	156938497	156939054
chr1	156939549	156939864
chr1	156969636	156970050
chr1	157056989	157057647
chr1	157059564	157060021
chr1	157062097	157063033
chr1	157064008	157064352
chr1	157071150	157071965
chr1	157076856	157077631
chr1	157080408	157081675
chr1	157083599	157084189
chr1	157084572	157085078
chr1	157086368	157086752
chr1	157087053	157087639
chr1	157120357	157120646
chr1	157191102	157191532
chr1	157235432	157236061
chr1	157264369	157264837
chr1	157271634	157271987
chr1	157332334	157332681
chr1	157340408	157340713
chr1	157374461	157374860
chr1	157441368	157441664
chr1	157497289	157497823
chr1	157657099	157657594
chr1	157820584	157821039
chr1	157850596	157851057
chr1	157882756	157883144
chr1	157883147	157883958
chr1	157893785	157894262
chr1	157921650	157922009
chr1	158109911	158110254
chr1	158274571	158274949
chr1	158338138	158338456
chr1	158405030	158405361
chr1	158424953	158425520
chr1	158425747	158426085
chr1	158426238	158426640
chr1	158488462	158488816
chr1	158520599	158520857
chr1	158587626	158587999
chr1	158589915	158590628
chr1	158597257	158598042
chr1	158603975	158605042
chr1	158671678	158671973
chr1	158709290	158709673
chr1	158742900	158743208
chr1	158843328	158843653
chr1	158855514	158855894
chr1	158861263	158861664
chr1	158869861	158870158
chr1	158887553	158887870
chr1	158893985	158894508
chr1	158894694	158895000
chr1	158927555	158928366
chr1	158932449	158932766
chr1	158932983	158933527
chr1	158934796	158935240
chr1	158966845	158967283
chr1	158998266	158998864
chr1	159003662	159004064
chr1	159007184	159007585
chr1	159011247	159011868
chr1	159021031	159021343
chr1	159031212	159031951
chr1	159044746	159045131
chr1	159049289	159049641
chr1	159342487	159342911
chr1	159347552	159347905
chr1	159356059	159356593
chr1	159405919	159406209
chr1	159436617	159437212
chr1	159437987	159438300
chr1	159565934	159566278
chr1	159639191	159639676
chr1	159641002	159641329
chr1	160663365	160663723
chr1	161162079	161162447
chr1	161318362	161319251
chr1	161323320	161323687
chr1	161447834	161448191
chr1	162109483	162109795
chr1	162124998	162125504
chr1	162190758	162191077
chr1	162237134	162237570
chr1	162276327	162276661
chr1	162397615	162397983
chr1	162450792	162451176
chr1	162461482	162461917
chr1	162504129	162504511
chr1	162622315	162622788
chr1	162623201	162623583
chr1	162670736	162671054
chr1	162786047	162786418
chr1	162836212	162836850
chr1	162933638	162933977
chr1	162940550	162940899
chr1	163070478	163070798
chr1	163211237	163211621
chr1	163393701	163394203
chr1	163430676	163430973
chr1	163437981	163438299
chr1	163664905	163665375
chr1	164023451	164023799
chr1	164033860	164034171
chr1	164155762	164156063
chr1	164439458	164439833
chr1	164789903	164790585
chr1	165492490	165492883
chr1	165622039	165622413
chr1	165638769	165639393
chr1	165681570	165681846
chr1	165859929	165860355
chr1	166322316	166322637
chr1	166356396	166356726
chr1	166717953	166718336
chr1	166728683	166729172
chr1	166885630	166886509
chr1	166924559	166924887
chr1	166942496	166942892
chr1	167006016	167006324
chr1	167014371	167014750
chr1	167040738	167041274
chr1	167062607	167062973
chr1	167089008	167089365
chr1	167113514	167114079
chr1	167121050	167121360
chr1	167124143	167124769
chr1	167390185	167390794
chr1	167391052	167391684
chr1	167548361	167548878
chr1	167607148	167607534
chr1	167607706	167608061
chr1	167747307	167747678
chr1	167754270	167754562
chr1	167775122	167775498
chr1	167805710	167805971
chr1	167906683	167907188
chr1	167933286	167933721
chr1	167944647	167945021
chr1	167973711	167974391
chr1	167979273	167979551
chr1	167990463	167990983
chr1	168019811	168020281
chr1	168057911	168058237
chr1	168212789	168213123
chr1	168227825	168228245
chr1	168272229	168272541
chr1	168273834	168274080
chr1	168309895	168310584
chr1	168741529	168741936
chr1	168743067	168743473
chr1	168874822	168875061
chr1	169172313	169172831
chr1	169199888	169200777
chr1	169214735	169215488
chr1	169220050	169220416
chr1	169528378	169528824
chr1	169574976	169575334
chr1	169844958	169845654
chr1	169899704	169900048
chr1	169946565	169946850
chr1	170127749	170128208
chr1	170164512	170164937
chr1	170347242	170347605
chr1	170431991	170432262
chr1	170673452	170673992
chr1	171194162	171194411
chr1	171315935	171316235
chr1	171346869	171347240
chr1	172040217	172040579
chr1	172041920	172042743
chr1	172562472	172562865
chr1	172574361	172574822
chr1	172585434	172586422
chr1	172587200	172587704
chr1	172588040	172588437
chr1	172595354	172595859
chr1	172630785	172631117
chr1	172632300	172632886
chr1	172721162	172721465
chr1	172764886	172765214
chr1	172797502	172797869
chr1	172949431	172950105
chr1	173024613	173024916
chr1	173041127	173041409
chr1	173175542	173175837
chr1	173211210	173211801
chr1	173217733	173218207
chr1	173252086	173252373
chr1	173341306	173341642
chr1	173346806	173347169
chr1	173385359	173385637
chr1	173433448	173433783
chr1	173957336	173957716
chr1	174038250	174038543
chr1	174063504	174064211
chr1	174070200	174070862
chr1	174084620	174085181
chr1	174099959	174100297
chr1	174173734	174174128
chr1	174219390	174219846
chr1	174227952	174228265
chr1	174242144	174242503
chr1	174245097	174245446
chr1	174306417	174306873
chr1	174432449	174433063
chr1	174433677	174434084
chr1	174437134	174437494
chr1	174493065	174493617
chr1	174562692	174563128
chr1	174890575	174890930
chr1	175667052	175667453
chr1	175911232	175911588
chr1	177603723	177604298
chr1	177622728	177623137
chr1	177802185	177802576
chr1	177861584	177861884
chr1	178684333	178684742
chr1	178744168	178744463
chr1	178752156	178752482
chr1	178764917	178765428
chr1	178775713	178776085
chr1	178779553	178779871
chr1	178859860	178860230
chr1	178863522	178863870
chr1	178880222	178880744
chr1	178938857	178939386
chr1	178940737	178940994
chr1	178941602	178942258
chr1	178944067	178945498
chr1	179080464	179081009
chr1	179294502	179294861
chr1	179371503	179372452
chr1	179372601	179373139
chr1	179374518	179374981
chr1	179375609	179375948
chr1	179377496	179378042
chr1	179485621	179486249
chr1	179515390	179515835
chr1	179524487	179524808
chr1	179553295	179553914
chr1	179564381	179564703
chr1	179570310	179570797
chr1	179572852	179573789
chr1	179573801	179574170
chr1	179576139	179576816
chr1	179608993	179609366
chr1	179638589	179639029
chr1	179726297	179726930
chr1	179727555	179727943
chr1	179913270	179913791
chr1	180117517	180118044
chr1	180168851	180169157
chr1	180266544	180267292
chr1	180298996	180299406
chr1	180312281	180312716
chr1	180336315	180336630
chr1	180458007	180458585
chr1	180472570	180472923
chr1	180888393	180888755
chr1	180971185	180971510
chr1	180971926	180972639
chr1	180974361	180974753
chr1	180984483	180984820
chr1	181168809	181169189
chr1	181467379	181467697
chr1	181515645	181516337
chr1	181522306	181522654
chr1	181539894	181540365
chr1	181604512	181604862
chr1	181619084	181619379
chr1	181639503	181639879
chr1	181754494	181754981
chr1	181774899	181775281
chr1	181793468	181793820
chr1	181890476	181890830
chr1	182028576	182029021
chr1	182034733	182035085
chr1	182102022	182102450
chr1	182113867	182114235
chr1	182116469	182116858
chr1	182130938	182131298
chr1	182140214	182141195
chr1	182181476	182181802
chr1	182186191	182186600
chr1	182214033	182214506
chr1	182214654	182215052
chr1	182242798	182243473
chr1	182244260	182244646
chr1	182317616	182317987
chr1	182341585	182341906
chr1	182364332	182364706
chr1	182388457	182388884
chr1	182392378	182393054
chr1	182440434	182441103
chr1	182476944	182477438
chr1	182534699	182535066
chr1	182537097	182537518
chr1	182626694	182627199
chr1	182655799	182656381
chr1	182693370	182693732
chr1	182698307	182698603
chr1	182707445	182707726
chr1	182707906	182708272
chr1	182778761	182779321
chr1	182780755	182781400
chr1	182843794	182844328
chr1	182865158	182865502
chr1	182875710	182876144
chr1	183074146	183074567
chr1	183141908	183142324
chr1	183162495	183163127
chr1	183185575	183185953
chr1	183186404	183187160
chr1	183265498	183265969
chr1	183282545	183282989
chr1	183325468	183325848
chr1	183442893	183443239
chr1	183459350	183459843
chr1	183480090	183480558
chr1	183480879	183481333
chr1	183482621	183483160
chr1	183483174	183483567
chr1	183489736	183490132
chr1	183807029	183807518
chr1	183818996	183819318
chr1	183923734	183924142
chr1	183949877	183950284
chr1	183958530	183958844
chr1	183983095	183983440
chr1	183985277	183985706
chr1	183998245	183998549
chr1	184009633	184010260
chr1	184029197	184029534
chr1	184040724	184041317
chr1	184046056	184046546
chr1	184054476	184054961
chr1	184271524	184272009
chr1	184391453	184391835
chr1	184419847	184420474
chr1	184429699	184430078
chr1	184431991	184432403
chr1	184436491	184437114
chr1	184445389	184445834
chr1	184447302	184448059
chr1	184450130	184451150
chr1	184457978	184458795
chr1	184472607	184472919
chr1	184473221	184473633
chr1	184535467	184535867
chr1	184550606	184551156
chr1	184610205	184610488
chr1	184613066	184613385
chr1	184695117	184695416
chr1	184722815	184723277
chr1	184826795	184827165
chr1	184838558	184838994
chr1	185467623	185468032
chr1	185493511	185493791
chr1	185692828	185693313
chr1	185728496	185728905
chr1	185729045	185729938
chr1	185811513	185812031
chr1	185857422	185857941
chr1	185889969	185890332
chr1	185930729	185931092
chr1	185954777	185955102
chr1	185956158	185956572
chr1	185994785	185995170
chr1	186084895	186085743
chr1	186207919	186208380
chr1	186304824	186305340
chr1	186400250	186400838
chr1	186499296	186499871
chr1	186531708	186532201
chr1	186606170	186606527
chr1	186669368	186669979
chr1	186710094	186710415
chr1	186732458	186732818
chr1	186746701	186747249
chr1	186861894	186862279
chr1	187017248	187017581
chr1	187053368	187054208
chr1	187155816	187156178
chr1	187186519	187187010
chr1	187274967	187275340
chr1	187573144	187573460
chr1	187710903	187711176
chr1	187733343	187733631
chr1	187878132	187878587
chr1	187958316	187958681
chr1	188013275	188013711
chr1	188020910	188021468
chr1	188074229	188074591
chr1	188136646	188136968
chr1	188137994	188138289
chr1	188167040	188167350
chr1	188223565	188224022
chr1	188229607	188229926
chr1	188231546	188232171
chr1	188266068	188266430
chr1	188272627	188272975
chr1	188406069	188406414
chr1	188407738	188408180
chr1	188409419	188409843
chr1	188519242	188519670
chr1	188524405	188524732
chr1	188529095	188529546
chr1	188538880	188539760
chr1	188563702	188564079
chr1	188572849	188573548
chr1	188924611	188924914
chr1	188959793	188960093
chr1	189118368	189118708
chr1	189118836	189119255
chr1	189728561	189728929
chr1	190213965	190214342
chr1	191011610	191012053
chr1	191542485	191542721
chr1	191624118	191624825
chr1	191635712	191636001
chr1	191706833	191707159
chr1	191746004	191746431
chr1	191748116	191748412
chr1	191753814	191754110
chr1	191815020	191815351
chr1	191951008	191951448
chr1	191952617	191952960
chr1	191956821	191957199
chr1	191985196	191985602
chr1	192514515	192514943
chr1	192587662	192588016
chr1	192592210	192592538
chr1	192597467	192597831
chr1	192735492	192735787
chr1	192796364	192796997
chr1	192798763	192799092
chr1	192801010	192801379
chr1	192813294	192813702
chr1	192878752	192879058
chr1	193007261	193007651
chr1	193039916	193040310
chr1	193048326	193048974
chr1	193078211	193078788
chr1	193081121	193081490
chr1	193084647	193085015
chr1	193099527	193099774
chr1	193106748	193107491
chr1	193116127	193116644
chr1	193123107	193123796
chr1	193141501	193141963
chr1	193220591	193221388
chr1	193259177	193259697
chr1	193298551	193298877
chr1	193322428	193322856
chr1	193331800	193332090
chr1	193344669	193344933
chr1	193345104	193345729
chr1	193352193	193352615
chr1	193399760	193400096
chr1	193449376	193449948
chr1	193465457	193465774
chr1	193484984	193485290
chr1	193485697	193486607
chr1	193629711	193630048
chr1	193632923	193633217
chr1	193679405	193679950
chr1	193720711	193721055
chr1	193730879	193731629
chr1	193739458	193739800
chr1	193805336	193805762
chr1	193885510	193886145
chr1	193894001	193895076
chr1	193900037	193900410
chr1	193913091	193913584
chr1	193960365	193961000
chr1	194367949	194368231
chr1	194522788	194523123
chr1	194562589	194563054
chr1	194575719	194576279
chr1	194581846	194582226
chr1	194604419	194605025
chr1	194605099	194605705
chr1	194615202	194615820
chr1	194615971	194616596
chr1	194618268	194618874
chr1	194624483	194624973
chr1	194624979	194625420
chr1	194625425	194625818
chr1	194626572	194626869
chr1	194632506	194633382
chr1	194666729	194667397
chr1	194675754	194676178
chr1	194678534	194678907
chr1	194680438	194681727
chr1	194696008	194696462
chr1	194913104	194913547
chr1	194955365	194955670
chr1	194956237	194956635
chr1	194995426	194995862
chr1	195000363	195000765
chr1	195015530	195015919
chr1	195023794	195024500
chr1	195042243	195042565
chr1	195058926	195059258
chr1	195099083	195099755
chr1	195116762	195117270
chr1	195127973	195128335
chr1	195142196	195142603
chr1	195143188	195143817
chr1	195164362	195165132
chr1	195171122	195171628
chr1	195173072	195173534
chr1	195176217	195176650
chr1	195207976	195208795
chr1	195215823	195216133
chr1	195225212	195225641
chr1	195226504	195226955
chr1	195233715	195234052
chr1	195348207	195348549
chr1	196049275	196049572
chr1	196445547	196446634
chr1	196446647	196447015
chr1	196448809	196449356
chr1	196455585	196455954
chr1	196508253	196508645
chr1	196514014	196514400
chr1	196565921	196566491
chr1	196568953	196569565
chr1	196573108	196573479
chr1	196705809	196706325
chr1	196802612	196803079
chr1	196853727	196854082
chr1	196957061	196957490
chr2	3035952	3036322
chr2	3075187	3075588
chr2	3089058	3089421
chr2	3191634	3191946
chr2	3201182	3201680
chr2	3243848	3244201
chr2	3336146	3336518
chr2	3341043	3341701
chr2	3392118	3392472
chr2	3538771	3539210
chr2	3558363	3558726
chr2	3601162	3601573
chr2	3621531	3621884
chr2	3634447	3634821
chr2	4285929	4286345
chr2	4334990	4335376
chr2	4344906	4345387
chr2	4349496	4349922
chr2	4366614	4367071
chr2	4376289	4376718
chr2	4425400	4426024
chr2	4438512	4439133
chr2	4452687	4453051
chr2	4462817	4463254
chr2	4477973	4478439
chr2	4489310	4489861
chr2	4527646	4528093
chr2	4549939	4550390
chr2	4686314	4686662
chr2	4733089	4733627
chr2	4872106	4872390
chr2	4984813	4985271
chr2	5019185	5019538
chr2	5087793	5088373
chr2	5209705	5209993
chr2	5273830	5274268
chr2	5301719	5302509
chr2	5420663	5421011
chr2	5582943	5583430
chr2	5765759	5766161
chr2	5815995	5816609
chr2	6050668	6051392
chr2	6239465	6239798
chr2	6270042	6270785
chr2	6271228	6271470
chr2	6273660	6273966
chr2	6588650	6589148
chr2	6642095	6642548
chr2	6642761	6643122
chr2	6793247	6793978
chr2	6797547	6798663
chr2	6881387	6881687
chr2	6923029	6923447
chr2	6962033	6962342
chr2	6976985	6977329
chr2	7010125	7010451
chr2	7011550	7011953
chr2	7036204	7036536
chr2	7268751	7269015
chr2	9515458	9515836
chr2	9679653	9680029
chr2	9800067	9800394
chr2	9800740	9801158
chr2	9891840	9892196
chr2	9917797	9918129
chr2	9926645	9926933
chr2	9970180	9970564
chr2	10001944	10002339
chr2	10705942	10706275
chr2	11005212	11005538
chr2	11261169	11261494
chr2	11298764	11299111
chr2	11312386	11312764
chr2	11351175	11351614
chr2	11422881	11423270
chr2	11451847	11452125
chr2	11456992	11457521
chr2	12238107	12238522
chr2	12246931	12247608
chr2	12618869	12619161
chr2	12620958	12621325
chr2	12932672	12932999
chr2	13192812	13193238
chr2	13219306	13219842
chr2	13293760	13294114
chr2	13331359	13331705
chr2	13331815	13332083
chr2	13424410	13424682
chr2	13984361	13984840
chr2	13995537	13995887
chr2	14058512	14059009
chr2	14086181	14086478
chr2	14155564	14155921
chr2	14202373	14202658
chr2	14744603	14744964
chr2	14970843	14971138
chr2	14976578	14977244
chr2	16272760	16273084
chr2	16405509	16405994
chr2	16659816	16660271
chr2	17313087	17313350
chr2	17762736	17763105
chr2	17948124	17948498
chr2	17949067	17949451
chr2	18139555	18139940
chr2	18313840	18314741
chr2	18686501	18686854
chr2	18715909	18716190
chr2	18761160	18761657
chr2	18769271	18769720
chr2	18784594	18784936
chr2	18786390	18786715
chr2	18817406	18818188
chr2	18819352	18819882
chr2	18842099	18842629
chr2	18876598	18877018
chr2	18886712	18887223
chr2	18919420	18920132
chr2	19081191	19081542
chr2	19328141	19328427
chr2	19522959	19523590
chr2	19579074	19579720
chr2	19637528	19637869
chr2	20564457	20564985
chr2	20815747	20816214
chr2	20844095	20844552
chr2	20860900	20861239
chr2	20867086	20867627
chr2	20890557	20891396
chr2	20893229	20893528
chr2	21152792	21153160
chr2	21158612	21158988
chr2	21202403	21202727
chr2	22561821	22562189
chr2	22591710	22592029
chr2	22750859	22751366
chr2	22874589	22874899
chr2	22894693	22895485
chr2	22908052	22908439
chr2	22924856	22925210
chr2	23011864	23012214
chr2	23838854	23839218
chr2	23904027	23904255
chr2	24362929	24363315
chr2	24598362	24598751
chr2	24621376	24621726
chr2	24774726	24775431
chr2	24790519	24791321
chr2	24805404	24805892
chr2	24816487	24816896
chr2	24817773	24818311
chr2	24831118	24831814
chr2	24966414	24966863
chr2	25036479	25036813
chr2	25041355	25041783
chr2	25079653	25080312
chr2	25080414	25080789
chr2	25082298	25082737
chr2	25083890	25084223
chr2	25110805	25111224
chr2	25121489	25121846
chr2	25127739	25128164
chr2	25147714	25148148
chr2	25174181	25174839
chr2	25219072	25219653
chr2	25220857	25221335
chr2	25228966	25229289
chr2	25256276	25256621
chr2	25283836	25284687
chr2	25287778	25288316
chr2	25298221	25298575
[truncated: 23,959 more rows]

## Sheet: CAO_2010_fibroblast_MYOD_mm9
MyOD1 chip-seq regions boudn in fibroblasts from Cao et al. 2010 Genome-wide MyoD Binding in Skeletal Muscle Cells: A Potential for Broad Cellular Reprogramming
https://homes.cs.washington.edu/~ruzzo/papers/DevCell/2010a/
Chromosome	Start position	End position
chr1	4775672	4776040
chr1	4797896	4798164
chr1	5010586	5011529
chr1	5072982	5073331
chr1	6444137	6444829
chr1	6448086	6448358
chr1	6809957	6810359
chr1	7078482	7079341
chr1	7095216	7095568
chr1	7196243	7196540
chr1	7387343	7388166
chr1	8310579	8310950
chr1	8314010	8314459
chr1	9122665	9122916
chr1	9535251	9536004
chr1	9639400	9639694
chr1	9737811	9738209
chr1	9933947	9934345
chr1	10029618	10030445
chr1	10221574	10221930
chr1	10560775	10561340
chr1	10684904	10685153
chr1	10870477	10870855
chr1	12107016	12107395
chr1	12231894	12232224
chr1	12281791	12282506
chr1	12601969	12602767
chr1	12613139	12613844
chr1	12682381	12682806
chr1	12708164	12708489
chr1	12750763	12751053
chr1	13230375	13230773
chr1	13417575	13417926
chr1	13562610	13562949
chr1	13579084	13579438
chr1	13579473	13580273
chr1	13650132	13650703
chr1	14001547	14002044
chr1	14294596	14295040
chr1	14300247	14300552
chr1	14706360	14706839
chr1	14745206	14745754
chr1	15669212	15669563
chr1	15700628	15700947
chr1	16095277	16096269
chr1	16099248	16099864
chr1	16577145	16577439
chr1	16608777	16609232
chr1	16616091	16616490
chr1	16651409	16651778
chr1	16986745	16987237
chr1	17087767	17088384
chr1	17645833	17646157
chr1	20048375	20048752
chr1	20623576	20623989
chr1	20656355	20656631
chr1	20657449	20658288
chr1	20659704	20660282
chr1	20660807	20661306
chr1	20667991	20668574
chr1	20681425	20681903
chr1	20860972	20861362
chr1	20913199	20913662
chr1	20941546	20941986
chr1	20992331	20992643
chr1	20998924	20999408
chr1	21004533	21004952
chr1	21018182	21018504
chr1	21031027	21031493
chr1	21042017	21042413
chr1	21042683	21043025
chr1	21054264	21054534
chr1	21069213	21069632
chr1	23389963	23390448
chr1	24107083	24107484
chr1	24293242	24293544
chr1	24478002	24478555
chr1	24546712	24547052
chr1	24556940	24557188
chr1	24560300	24560771
chr1	24685192	24685557
chr1	26744713	26745202
chr1	28950743	28951260
chr1	30908793	30909101
chr1	31108423	31108846
chr1	31116649	31116914
chr1	33584213	33584573
chr1	33650738	33651191
chr1	33726404	33726786
chr1	33730136	33730528
chr1	33857639	33857952
chr1	33871141	33871553
chr1	33964136	33965052
chr1	34067877	34068668
chr1	34098149	34098583
chr1	34100156	34100557
chr1	34151916	34152369
chr1	34167828	34168326
chr1	34177960	34178301
chr1	34184482	34185031
chr1	34207330	34207846
chr1	34241151	34241638
chr1	34242933	34243214
chr1	34495939	34496474
chr1	34573536	34573840
chr1	34858658	34859175
chr1	34885619	34886092
chr1	34899654	34900103
chr1	34906600	34906937
chr1	34982972	34983287
chr1	35862378	35862898
chr1	35863673	35863994
chr1	35936530	35937042
chr1	35970387	35970788
chr1	36087169	36087981
chr1	36125244	36126088
chr1	36145279	36145649
chr1	36185800	36186240
chr1	36187137	36187493
chr1	36189075	36189382
chr1	36189948	36190207
chr1	36300949	36301394
chr1	36364687	36365154
chr1	36365244	36365815
chr1	36380886	36381250
chr1	36382476	36383301
chr1	36526822	36527492
chr1	36528099	36528859
chr1	36554121	36554559
chr1	36568420	36568944
chr1	36568996	36569742
chr1	36580399	36581004
chr1	36614078	36615268
chr1	36619953	36620544
chr1	36620671	36621639
chr1	36629065	36629404
chr1	36636804	36637656
chr1	36703117	36703506
chr1	36704394	36704877
chr1	36766686	36767093
chr1	36917405	36917774
chr1	37179161	37179556
chr1	37364444	37365010
chr1	37695968	37696307
chr1	37753904	37754292
chr1	37947120	37947550
chr1	38054703	38055147
chr1	38186469	38187155
chr1	38279091	38279492
chr1	38485732	38486086
chr1	38507571	38507872
chr1	39044340	39044971
chr1	39135835	39136136
chr1	39162380	39162722
chr1	39163502	39163838
chr1	39314077	39314534
chr1	39338508	39339279
chr1	39340144	39340573
chr1	39437819	39438328
chr1	39534859	39535783
chr1	39634047	39634585
chr1	39669968	39670249
chr1	39744003	39744671
chr1	39748525	39749221
chr1	39771607	39772051
chr1	39803227	39803881
chr1	39806484	39806814
chr1	39811437	39812060
chr1	39815877	39816223
chr1	39818861	39819231
chr1	39907863	39908276
chr1	39946143	39946502
chr1	39951902	39952323
chr1	39980331	39980644
chr1	39998060	39998382
chr1	40022322	40022697
chr1	40108047	40108368
chr1	40185369	40185677
chr1	40290046	40290480
chr1	40310725	40311356
chr1	40329033	40329499
chr1	40338734	40339208
chr1	40339255	40339802
chr1	40340831	40341235
chr1	40715871	40716195
chr1	40724282	40724665
chr1	40771546	40772432
chr1	40892352	40892635
chr1	40897212	40897914
chr1	40899198	40899477
chr1	41050112	41050495
chr1	41198906	41199239
chr1	42648758	42649162
chr1	42907771	42908143
chr1	43148932	43149736
chr1	43155072	43155868
chr1	43184746	43185523
chr1	43193289	43193965
chr1	43198321	43198832
chr1	43204351	43204732
chr1	43220624	43221089
chr1	43279929	43280292
chr1	43280991	43281450
chr1	43282667	43283034
chr1	43294626	43295090
chr1	43301887	43302211
chr1	43316571	43317606
chr1	43415055	43415370
chr1	43424224	43424792
chr1	43453498	43453816
chr1	43479502	43479856
chr1	43522772	43523092
chr1	43531261	43531588
chr1	43650423	43650660
chr1	43755356	43755721
chr1	43771692	43771993
chr1	43779312	43779693
chr1	43824839	43825154
chr1	43867065	43867490
chr1	43875914	43876315
chr1	43990410	43991031
chr1	44641636	44642005
chr1	45361116	45361509
chr1	45368354	45368658
chr1	45412896	45413198
chr1	45560897	45561230
chr1	45644492	45644925
chr1	45682784	45683197
chr1	45894540	45894984
chr1	46909973	46910756
chr1	50984505	50984964
chr1	51027757	51028046
chr1	51056671	51056999
chr1	51256309	51256722
chr1	51300102	51300564
chr1	51346653	51347170
chr1	51390572	51390958
chr1	51443710	51444088
chr1	51535003	51535447
chr1	51550436	51550842
chr1	51641653	51642199
chr1	51700496	51700833
chr1	51734732	51735023
chr1	51803681	51803997
chr1	51971910	51972272
chr1	51972819	51973147
chr1	52170546	52170956
chr1	52288708	52289578
chr1	52511490	52512092
chr1	52557320	52557703
chr1	52687308	52687655
chr1	52783557	52784369
chr1	52820840	52821203
chr1	52844103	52844498
chr1	53028719	53029118
chr1	53409081	53409665
chr1	53841403	53841785
chr1	53841857	53842121
chr1	53902707	53903209
chr1	53913403	53914051
chr1	53996241	53996605
chr1	53997021	53997505
chr1	54251458	54251939
chr1	54383464	54383831
chr1	54614343	54614726
chr1	54982820	54983456
chr1	55109339	55110130
chr1	55187680	55188876
chr1	55190272	55190561
chr1	55258722	55259549
chr1	55293783	55294277
chr1	55462404	55463168
chr1	55580735	55581303
chr1	55585531	55585972
chr1	55629511	55629918
chr1	55632811	55633187
chr1	55930983	55931355
chr1	56754244	56754681
chr1	57281652	57281945
chr1	57434156	57434571
chr1	57444655	57445244
chr1	57493790	57494197
chr1	57567487	57568127
chr1	57930858	57931173
chr1	58026177	58026536
chr1	58088168	58088504
chr1	58297421	58297748
chr1	58357769	58358303
chr1	58360482	58360896
chr1	58361044	58361643
chr1	58768361	58768729
chr1	58769459	58769803
chr1	58799420	58799732
chr1	58801467	58801848
chr1	58966665	58967080
chr1	59002973	59003521
chr1	59009444	59009751
chr1	59018027	59018374
chr1	59030770	59031129
chr1	59176259	59176724
chr1	59219717	59220205
chr1	59397702	59398136
chr1	59441268	59441580
chr1	59466451	59466789
chr1	59487919	59488289
chr1	59507764	59508154
chr1	59532368	59532881
chr1	59540767	59541078
chr1	59573041	59573518
chr1	59820160	59820585
chr1	59959543	59959837
chr1	59969786	59970134
chr1	60236989	60237510
chr1	60399985	60400560
chr1	60623210	60624191
chr1	60629432	60629961
chr1	60882601	60883110
chr1	60970257	60970581
chr1	60973335	60973803
chr1	61472314	61472658
chr1	62463410	62463810
chr1	62565089	62565417
chr1	62579388	62579754
chr1	62725177	62725530
chr1	62749742	62750300
chr1	62753058	62753650
chr1	62764844	62765161
chr1	62768354	62768690
chr1	62771384	62772037
chr1	62820924	62821236
chr1	62826642	62827040
chr1	62830410	62831071
chr1	62885271	62885593
chr1	62907457	62907784
chr1	63023318	63023696
chr1	63245971	63246416
chr1	63286171	63286769
chr1	63580953	63581273
chr1	63674817	63675223
chr1	63758954	63759297
chr1	64168277	64168666
chr1	64272680	64273235
chr1	64579250	64579642
chr1	64655643	64656217
chr1	64661892	64662452
chr1	64664177	64664541
chr1	64670360	64670801
chr1	64782796	64783297
chr1	64791164	64791465
chr1	64851835	64852161
chr1	64873012	64873388
chr1	64898798	64899165
chr1	64995955	64996308
chr1	65003029	65003592
chr1	65034739	65035138
chr1	65135494	65135846
chr1	65138210	65138480
chr1	65179431	65179783
chr1	65225692	65226061
chr1	65264587	65264917
chr1	65292178	65292628
chr1	65784101	65784425
chr1	66218661	66219207
chr1	66747103	66747767
chr1	66968657	66968982
chr1	67085298	67085617
chr1	69272882	69273109
chr1	69274475	69274936
chr1	69294206	69294634
chr1	69554211	69554484
chr1	69733652	69734128
chr1	69848054	69848362
chr1	70182109	70182645
chr1	70303579	70303904
chr1	70772175	70772527
chr1	70964765	70965318
chr1	71044193	71044529
chr1	71146402	71147002
chr1	71439012	71439530
chr1	71478916	71479256
chr1	71603511	71603870
chr1	71699135	71700003
chr1	71720227	71720580
chr1	71735522	71735787
chr1	71813678	71814069
chr1	71871036	71871347
chr1	71897854	71898266
chr1	71934295	71935117
chr1	71987089	71987422
chr1	72132237	72132634
chr1	72151974	72152372
chr1	72220276	72220609
chr1	72229460	72229870
chr1	72301925	72302437
chr1	72356184	72357296
chr1	72465259	72465725
chr1	72475753	72476092
chr1	72639916	72640568
chr1	72654874	72655423
chr1	72655724	72656368
chr1	72719626	72719966
chr1	72782969	72783355
chr1	72829766	72830407
chr1	72843512	72844387
chr1	72870936	72871522
chr1	72871935	72872329
chr1	72916758	72917362
chr1	72918821	72919108
chr1	72935132	72935459
chr1	72997799	72998933
chr1	73006742	73007295
chr1	73012613	73013509
chr1	73015636	73016593
chr1	73087307	73087593
chr1	73101720	73102047
chr1	73288824	73289296
chr1	73331980	73332296
chr1	73400881	73401404
chr1	73407815	73408236
chr1	73732247	73732700
chr1	73867214	73867659
chr1	73870879	73871647
chr1	73997658	73998277
chr1	74002278	74002652
chr1	74009712	74010017
chr1	74012950	74013559
chr1	74045018	74046012
chr1	74048005	74048359
chr1	74055049	74055428
chr1	74074412	74074709
chr1	74075140	74075974
chr1	74081286	74081643
chr1	74095976	74096278
chr1	74171712	74172099
chr1	74282772	74283326
chr1	74295321	74295672
chr1	74296164	74296512
chr1	74341710	74342762
chr1	74343936	74344213
chr1	74378899	74379506
chr1	74422968	74423295
chr1	74433311	74433576
chr1	74437796	74438319
chr1	74634438	74635086
chr1	74647642	74648158
chr1	74793833	74794307
chr1	74795274	74795769
chr1	74795771	74796310
chr1	74844023	74844513
chr1	74846949	74847391
chr1	74849556	74850053
chr1	74852914	74853543
chr1	74853638	74853996
chr1	74854701	74855138
chr1	74855663	74855951
chr1	74901321	74901669
chr1	74995442	74995820
chr1	75086858	75087523
chr1	75120718	75121043
chr1	75121121	75121487
chr1	75139182	75139607
chr1	75175703	75177087
chr1	75188368	75188722
chr1	75214877	75215640
chr1	75227812	75228194
chr1	75232907	75233227
chr1	75244651	75245166
chr1	75248106	75248463
chr1	75287880	75288239
chr1	75289380	75289929
chr1	75313518	75314622
chr1	75340868	75341913
chr1	75355950	75356262
chr1	75356597	75357559
chr1	75366922	75367292
chr1	75376531	75377046
chr1	75389815	75390238
chr1	75396365	75396901
chr1	75404618	75405165
chr1	75464087	75464637
chr1	75473787	75474343
chr1	75502477	75503569
chr1	75552287	75552612
chr1	75556047	75556448
chr1	77399216	77399523
chr1	77457279	77458024
chr1	78178309	78178849
chr1	78212453	78212786
chr1	78213734	78214310
chr1	78214930	78215295
chr1	78334874	78335171
chr1	78343865	78344434
chr1	78384515	78384845
chr1	78528739	78529475
chr1	78533975	78534657
chr1	78534899	78535531
chr1	78607584	78607950
chr1	78654012	78654800
chr1	78730097	78730460
chr1	78741727	78742274
chr1	78807627	78807886
chr1	79140609	79140929
chr1	79668304	79668679
chr1	79758128	79758446
chr1	79772507	79773012
chr1	80015242	80015800
chr1	80445831	80446166
chr1	80640646	80640955
chr1	80753451	80753805
chr1	81668364	81668683
chr1	81723197	81723769
chr1	81740866	81741470
chr1	81752213	81752691
chr1	81883507	81883862
chr1	81910206	81910663
chr1	82152607	82152974
chr1	82186060	82186378
chr1	82287506	82287963
chr1	82313372	82313775
chr1	82316991	82317385
chr1	82631042	82631499
chr1	82984402	82984740
chr1	83893236	83893538
chr1	84356651	84357328
chr1	84357965	84358284
chr1	84414320	84414667
chr1	84503430	84503800
chr1	84836972	84837358
chr1	84878197	84878710
chr1	87690066	87690456
chr1	87914948	87915311
chr1	88001652	88001976
chr1	88083224	88083726
chr1	88153863	88154195
chr1	88165352	88165803
chr1	88181897	88182275
chr1	88196693	88197160
chr1	88197293	88197713
chr1	88197874	88198339
chr1	88268564	88268890
chr1	88330594	88331762
chr1	88331920	88332471
chr1	88339367	88339719
chr1	88344864	88345313
chr1	88367191	88367753
chr1	88383885	88384357
chr1	88400541	88401360
chr1	88401988	88402502
chr1	88405971	88406391
chr1	88407456	88408081
chr1	88422777	88423309
chr1	88428593	88428878
chr1	88508658	88509003
chr1	88552495	88552849
chr1	88574293	88574622
chr1	88654598	88655211
chr1	88873617	88873984
chr1	88898093	88898502
chr1	88947059	88947802
chr1	88947910	88948480
chr1	88967287	88967737
chr1	89038991	89039401
chr1	89081384	89081746
chr1	89087010	89087618
chr1	89101906	89102505
chr1	89110281	89111243
chr1	89167427	89167891
chr1	89212483	89212838
chr1	89223259	89224323
chr1	89383005	89383534
chr1	89388817	89389179
chr1	89490841	89491170
chr1	89503994	89504772
chr1	89733042	89733409
chr1	89797441	89797790
chr1	90146107	90146609
chr1	90151397	90151915
chr1	90242202	90242547
chr1	90257781	90258688
chr1	90277505	90278081
chr1	90315805	90316141
chr1	90370905	90371634
chr1	90371965	90372429
chr1	90374776	90375163
chr1	90452956	90453411
chr1	90535826	90536812
chr1	90588735	90589368
chr1	90598623	90599237
chr1	90602354	90602678
chr1	90660321	90660829
chr1	90661080	90661530
chr1	90766528	90766954
chr1	90771771	90772158
chr1	90787559	90788023
chr1	90805145	90806010
chr1	90820719	90821109
chr1	90832331	90832826
chr1	90907970	90908453
chr1	90983177	90983746
chr1	91004487	91004858
chr1	91010732	91011227
chr1	91013613	91014112
chr1	91016826	91017250
chr1	91018336	91018680
chr1	91026917	91027469
chr1	91068072	91068423
chr1	91148342	91148776
chr1	91304588	91304912
chr1	91309715	91310078
chr1	91351139	91351680
chr1	91351818	91352186
chr1	91352254	91352639
chr1	91405814	91406151
chr1	91406301	91406986
chr1	91417687	91418436
chr1	91418500	91418873
chr1	91434745	91436082
chr1	91441536	91442144
chr1	91451495	91452462
chr1	91453988	91454372
chr1	91454608	91454962
chr1	91467078	91467540
chr1	91476970	91477763
chr1	91477880	91478219
chr1	91499101	91499873
chr1	91660598	91660934
chr1	91895280	91895632
chr1	91955992	91956294
chr1	92053142	92053535
chr1	92058155	92058509
chr1	92058908	92060112
chr1	92060769	92061493
chr1	92111511	92111885
chr1	92124982	92125317
chr1	92155119	92155543
chr1	92157183	92158130
chr1	92169900	92170256
chr1	92185575	92185920
chr1	92231487	92231885
chr1	92234391	92234781
chr1	92267413	92267808
chr1	92294053	92294438
chr1	92337977	92338420
chr1	92350867	92351216
chr1	92364111	92364421
chr1	92382887	92383435
chr1	92394031	92394486
chr1	92403019	92403655
chr1	92496008	92496250
chr1	92530281	92530735
chr1	92547256	92547830
chr1	92549205	92549508
chr1	92565420	92565751
chr1	92573269	92573715
chr1	92619967	92620295
chr1	92630722	92631294
chr1	92654886	92655231
chr1	92735303	92735657
chr1	92763389	92763708
chr1	92798953	92799290
chr1	92806243	92806823
chr1	92864006	92864575
chr1	92870092	92870520
chr1	92871410	92872000
chr1	92895175	92895707
chr1	92919041	92919463
chr1	92919885	92920352
chr1	92929095	92929521
chr1	92949096	92950226
chr1	92957615	92958039
chr1	92961771	92962213
chr1	92995321	92995836
chr1	93077344	93077661
chr1	93089967	93090276
chr1	93107665	93108068
chr1	93113119	93113858
chr1	93116201	93116568
chr1	93128586	93128918
chr1	93144638	93145372
chr1	93226052	93226367
chr1	93233917	93234468
chr1	93248860	93249531
chr1	93252680	93253137
chr1	93295249	93295786
chr1	93308887	93309154
chr1	93309721	93310157
chr1	93310511	93311296
chr1	93354808	93355861
chr1	93355970	93356431
chr1	93380231	93380897
chr1	93436756	93437526
chr1	93472178	93472597
chr1	93474187	93474756
chr1	93497145	93497549
chr1	93589070	93589573
chr1	93591872	93592209
chr1	93619329	93619633
chr1	93628206	93628641
chr1	93697422	93697745
chr1	93719608	93719944
chr1	93843945	93844413
chr1	93852847	93853252
chr1	93912849	93913161
chr1	93951693	93952116
chr1	93996001	93996549
chr1	94026873	94027573
chr1	94073752	94074104
chr1	94077404	94077723
chr1	94099089	94099673
chr1	94193257	94193608
chr1	94237251	94237536
chr1	94239832	94240967
chr1	94244884	94245315
chr1	94267964	94268538
chr1	94269101	94269613
chr1	94275704	94276206
chr1	94325042	94325335
chr1	94534670	94535012
chr1	94545274	94545719
chr1	94572909	94573605
chr1	94579635	94580357
chr1	94595477	94596385
chr1	94599689	94601158
chr1	94605006	94605607
chr1	94609010	94609358
chr1	94648188	94648872
chr1	94672497	94672824
chr1	94672960	94673309
chr1	94679210	94679693
chr1	94683557	94684521
chr1	94687247	94687564
chr1	94698348	94699002
chr1	94710925	94711320
chr1	94712349	94712847
chr1	94727686	94728489
chr1	94729180	94729649
chr1	94735812	94736135
chr1	94736826	94737179
chr1	94774085	94774483
chr1	94803252	94804188
chr1	94808389	94808970
chr1	94911024	94911341
chr1	94999066	94999459
chr1	95036314	95036758
chr1	95062037	95062485
chr1	95063244	95063615
chr1	95125823	95126195
chr1	95132385	95133145
chr1	95166209	95166480
chr1	95202213	95202623
chr1	95239293	95239644
chr1	95240253	95240589
chr1	95269378	95269762
chr1	95285462	95285845
chr1	95375352	95375947
chr1	95530971	95531446
chr1	95531490	95532102
chr1	95576739	95577197
chr1	95582102	95582637
chr1	95583054	95583585
chr1	95698291	95698662
chr1	95700123	95700595
chr1	95721701	95722190
chr1	95931795	95932222
chr1	97164763	97165080
chr1	99557199	99557721
chr1	99986014	99986274
chr1	100065944	100066709
chr1	107208942	107209259
chr1	107328414	107328694
chr1	107331667	107332045
chr1	107802971	107803342
chr1	107886497	107887172
chr1	107890133	107890618
chr1	107962373	107962740
chr1	108059946	108060408
chr1	108068856	108069263
chr1	108211129	108211622
chr1	108283120	108283516
chr1	108523689	108524311
chr1	108526650	108527111
chr1	108540194	108540540
chr1	108656092	108656463
chr1	113760531	113760782
chr1	114555540	114555854
chr1	114647135	114647525
chr1	116570491	116570991
chr1	120207720	120208172
chr1	120256133	120256488
chr1	120341007	120341371
chr1	120342026	120342406
chr1	120375777	120376140
chr1	120380154	120380466
chr1	120873184	120873806
chr1	120879103	120879434
chr1	120946586	120946920
chr1	121004647	121005520
chr1	121019789	121020415
chr1	121021937	121022542
chr1	121148973	121149379
chr1	121149936	121150368
chr1	121153504	121153914
chr1	121196735	121197203
chr1	121198990	121199301
chr1	121301192	121301730
chr1	121390576	121390955
chr1	121401050	121401767
chr1	121421342	121421810
chr1	121437658	121438270
chr1	121734033	121734438
chr1	121931390	121932612
chr1	121935145	121935573
chr1	121941019	121941638
chr1	121951539	121952045
chr1	121977177	121977667
chr1	122017534	122017989
chr1	122032870	122033243
chr1	122093746	122094092
chr1	122120219	122120586
chr1	122132960	122133560
chr1	122141209	122141616
chr1	122142169	122142610
chr1	122161609	122162166
chr1	122271389	122271932
chr1	122446518	122446835
chr1	122503397	122503701
chr1	122667822	122668200
chr1	122818109	122818419
chr1	122871212	122871526
chr1	122971074	122971667
chr1	123091380	123091725
chr1	123123036	123123434
chr1	123224341	123224853
chr1	123257126	123257576
chr1	123263932	123264239
chr1	123273988	123274383
chr1	127286030	127287376
chr1	127316491	127316799
chr1	127332013	127332665
chr1	127404942	127405493
chr1	127438893	127439275
chr1	127456871	127458168
chr1	127561874	127562164
chr1	127573303	127573654
chr1	128381169	128381704
chr1	128522629	128523294
chr1	128557230	128557543
chr1	129670526	129671035
chr1	129730317	129730651
chr1	129756402	129756705
chr1	129998708	129999030
chr1	129999212	129999572
chr1	130000218	130000575
chr1	130038331	130038612
chr1	130256006	130256368
chr1	130340866	130341577
chr1	130368665	130369794
chr1	130405410	130406233
chr1	130463548	130464269
chr1	130487738	130488129
chr1	130583783	130584139
chr1	130683437	130683870
chr1	130683876	130684282
chr1	130729571	130730277
chr1	130753426	130754041
chr1	131548154	131548382
chr1	131602171	131602809
chr1	131628564	131628948
chr1	131734315	131734773
chr1	132358957	132359509
chr1	132934996	132935339
chr1	132959332	132959938
chr1	133022517	133022867
chr1	133034490	133034986
chr1	133049598	133049918
chr1	133080672	133081217
chr1	133092225	133092836
chr1	133106735	133107097
chr1	133135554	133136006
chr1	133141833	133142138
chr1	133243533	133243842
chr1	133256174	133256546
chr1	133256649	133256941
chr1	133328325	133328873
chr1	133423575	133424085
chr1	133445043	133445379
chr1	133620168	133620521
chr1	133626324	133626689
chr1	133636138	133636751
chr1	133647556	133648282
chr1	133651490	133652144
chr1	133751572	133751859
chr1	133904441	133904743
chr1	133992096	133992484
chr1	134017813	134018215
chr1	134018361	134019068
chr1	134024797	134025316
chr1	134044462	134044768
chr1	134048186	134049195
chr1	134095870	134096179
chr1	134097237	134097789
chr1	134183462	134183769
chr1	134187505	134187850
chr1	134188762	134189184
chr1	134195051	134195465
chr1	134215813	134216166
chr1	134231845	134232315
chr1	134242441	134243412
chr1	134250861	134251232
chr1	134251654	134251991
chr1	134267312	134267707
chr1	134281474	134281956
chr1	134286700	134287154
chr1	134287186	134287618
chr1	134313832	134314416
chr1	134440343	134440686
chr1	134662834	134663145
chr1	134749863	134750238
chr1	134787278	134787672
chr1	134814311	134815354
chr1	134936180	134936548
chr1	134965714	134966181
chr1	135000425	135000873
chr1	135077742	135078149
chr1	135114121	135114547
chr1	135219793	135220057
chr1	135260001	135260354
chr1	135362281	135362669
chr1	135367701	135368279
chr1	135592488	135592856
chr1	135633297	135633588
chr1	135661843	135662541
chr1	135673877	135674708
chr1	135695078	135695473
chr1	135730766	135731378
chr1	135739892	135740332
chr1	135752731	135753183
chr1	135789228	135790481
chr1	135797332	135797810
chr1	135801852	135802212
chr1	135804903	135805207
chr1	135837892	135838941
chr1	135849927	135850310
chr1	135856125	135856716
chr1	135857966	135858339
chr1	135957684	135958122
chr1	135967298	135968469
chr1	135973955	135974295
chr1	135974604	135975015
chr1	135975713	135976074
chr1	135989290	135990003
chr1	135993176	135993513
chr1	135995960	135997128
chr1	136007026	136007381
chr1	136090840	136091193
chr1	136091693	136092342
chr1	136092558	136092977
chr1	136141580	136142514
chr1	136179673	136180090
chr1	136182340	136182687
chr1	136186097	136186726
chr1	136203844	136204366
chr1	136217172	136217892
chr1	136229261	136229999
chr1	136230920	136231348
chr1	136235814	136236074
chr1	136270714	136271071
chr1	136308306	136308675
chr1	136311865	136312331
chr1	136351755	136352444
chr1	136415205	136415517
chr1	136563157	136563564
chr1	136755251	136755646
chr1	136805981	136806538
chr1	136851953	136852768
chr1	136917471	136917845
chr1	136986184	136986632
chr1	136987512	136987848
chr1	137002507	137002861
chr1	137007746	137008192
chr1	137025625	137025972
chr1	137063960	137064347
chr1	137080680	137080952
chr1	137180128	137180692
chr1	137209893	137210346
chr1	137243442	137243910
chr1	137263087	137263462
chr1	137271381	137272324
chr1	137326647	137327274
chr1	137382321	137382682
chr1	137427588	137427951
chr1	137431873	137432301
chr1	137441404	137441872
chr1	137448574	137448915
chr1	137451236	137451940
chr1	137460342	137460874
chr1	137464648	137465285
chr1	137487171	137487964
chr1	137522601	137523333
chr1	137540840	137541147
chr1	137556379	137556754
chr1	137564566	137565440
chr1	137566966	137567333
chr1	137571991	137572624
chr1	137583346	137583700
chr1	137584583	137585184
chr1	137594886	137595376
chr1	137595716	137596257
chr1	137625456	137626023
chr1	137628501	137628923
chr1	137637605	137638029
chr1	137659991	137660547
chr1	137662561	137662915
chr1	137662919	137663251
chr1	137667429	137668142
chr1	137675479	137676342
chr1	137691426	137691849
chr1	137710281	137710782
chr1	137717231	137717641
chr1	137730681	137731117
chr1	137741016	137741519
chr1	137749068	137749426
chr1	137758837	137759230
chr1	137761296	137761979
chr1	137822416	137822829
chr1	137826358	137826764
chr1	137830352	137830753
chr1	137882901	137883149
chr1	137894164	137894500
chr1	137904038	137904795
chr1	137948020	137948503
chr1	137949082	137949429
chr1	137962903	137963656
chr1	138032993	138033383
chr1	138035003	138035358
chr1	138124649	138125306
chr1	138150014	138150666
chr1	138311672	138312227
chr1	138352279	138352608
chr1	138455916	138456164
chr1	138509786	138510411
chr1	138579579	138580417
chr1	138621746	138622118
chr1	138812010	138812295
chr1	138823654	138823988
chr1	139854644	139854955
chr1	139869958	139870431
chr1	140222603	140222973
chr1	140404071	140404419
chr1	140438024	140438394
chr1	140492664	140493166
chr1	140516173	140516463
chr1	140826555	140827265
chr1	140859732	140860524
chr1	145371514	145371826
chr1	145549786	145550379
chr1	145587153	145587383
chr1	145624142	145625025
chr1	145851097	145851547
chr1	145932737	145933268
chr1	146025735	146026000
chr1	146700352	146700641
chr1	147783090	147783384
chr1	147804955	147805237
chr1	151605587	151605871
chr1	151776269	151776683
chr1	151793534	151793913
chr1	151936184	151936529
chr1	151946838	151947187
chr1	151982528	151982860
chr1	152319583	152320007
chr1	152327882	152328224
chr1	152674304	152674673
chr1	152909441	152909877
chr1	153019180	153019471
chr1	153075619	153076069
chr1	153097741	153098502
chr1	153192249	153192578
chr1	153485455	153485896
chr1	153602120	153603272
chr1	153613317	153613675
chr1	153647483	153647850
chr1	154050361	154050897
chr1	154383546	154383985
chr1	154403290	154403719
chr1	154487833	154488196
chr1	154534558	154534848
chr1	154801126	154801633
chr1	154892542	154892855
chr1	154938971	154939619
chr1	154954913	154955360
chr1	154977060	154977452
chr1	155049278	155049796
chr1	155155259	155155656
chr1	155179110	155179510
chr1	155192161	155192562
chr1	155348597	155349381
chr1	155403016	155403818
chr1	155481972	155482800
chr1	155488511	155489038
chr1	155514618	155514999
chr1	155550557	155550881
chr1	155552017	155552392
chr1	155580312	155580816
chr1	155746795	155747362
chr1	155753092	155753370
chr1	155816504	155817230
chr1	155965843	155966091
chr1	155997286	155997724
chr1	156003562	156003965
chr1	156022372	156022884
chr1	156888086	156888370
chr1	156897342	156897758
chr1	156921950	156922403
chr1	156930298	156930804
chr1	156938517	156939040
chr1	156939549	156939835
chr1	156969667	156970010
chr1	157059615	157060075
chr1	157061929	157062935
chr1	157071423	157071980
chr1	157076729	157077597
chr1	157080850	157081706
chr1	157083733	157084036
chr1	157084534	157085035
chr1	157087048	157087658
chr1	157191015	157191554
chr1	157235542	157236002
chr1	157374467	157374812
chr1	157657151	157657574
chr1	157882746	157883913
chr1	157893844	157894321
chr1	157921630	157922048
chr1	158147493	158147835
chr1	158274503	158274967
chr1	158275790	158276144
chr1	158338168	158338588
chr1	158404095	158404478
chr1	158425083	158425553
chr1	158426287	158426571
chr1	158437879	158438129
chr1	158488477	158488768
chr1	158590126	158590627
chr1	158597136	158598179
chr1	158603990	158604973
chr1	158709289	158709670
chr1	158742902	158743192
chr1	158843381	158843624
chr1	158869794	158870151
chr1	158927548	158928486
chr1	158932992	158933792
chr1	158934696	158935260
chr1	158998350	158998930
chr1	159003665	159004054
chr1	159007088	159007659
chr1	159011282	159011962
chr1	159021062	159021368
chr1	159031210	159031954
chr1	159342475	159342990
chr1	159347583	159347899
chr1	159370334	159370657
chr1	159436554	159437351
chr1	159437792	159438305
chr1	159563642	159563927
chr1	159565921	159566252
chr1	159639212	159639695
chr1	159640997	159641318
chr1	160663360	160663742
chr1	161161923	161162461
chr1	161318448	161319168
chr1	161323302	161323648
chr1	161616551	161616921
chr1	161763415	161763760
chr1	162109458	162109933
chr1	162124986	162125489
chr1	162143049	162143355
chr1	162190729	162191079
chr1	162415930	162416251
chr1	162450753	162451264
chr1	162461481	162461968
chr1	162504143	162504504
chr1	162622185	162622979
chr1	162623116	162623588
chr1	162786058	162786355
chr1	162808628	162808939
chr1	162933647	162933929
chr1	162940547	162940909
chr1	163070533	163070817
chr1	163211215	163211635
chr1	163393703	163394133
chr1	163430715	163431018
chr1	163437952	163438302
chr1	163664475	163665384
chr1	163947031	163947340
chr1	164023453	164023817
chr1	164033904	164034152
chr1	164146010	164146263
chr1	164155725	164156086
chr1	164439466	164439858
chr1	164500510	164500930
chr1	164703869	164704227
chr1	164790012	164790466
chr1	165042645	165043261
chr1	165151860	165152185
chr1	165222204	165222490
chr1	165492426	165492910
chr1	165622046	165622498
chr1	165638745	165639193
chr1	165859931	165860314
chr1	166205526	166206015
chr1	166392106	166392356
chr1	166717967	166718322
chr1	166728783	166729189
chr1	166886022	166886375
chr1	167005944	167006311
chr1	167014272	167014778
chr1	167062364	167062974
chr1	167088988	167089353
chr1	167113621	167113970
chr1	167120997	167121351
chr1	167124144	167124751
chr1	167129053	167129336
chr1	167391038	167391710
chr1	167744919	167745311
chr1	167747306	167747677
chr1	167754251	167754547
chr1	167906733	167907038
chr1	167933172	167933732
chr1	167973810	167974390
chr1	167986531	167986863
chr1	168019793	168020169
chr1	168053949	168054277
chr1	168057724	168058202
chr1	168084306	168084644
chr1	168212648	168213197
chr1	168272222	168272583
chr1	168273726	168274147
chr1	168310107	168310533
chr1	168741569	168741946
chr1	168743069	168743448
chr1	168898317	168898754
chr1	169164534	169164865
chr1	169170600	169170916
chr1	169172159	169173407
chr1	169199918	169200421
chr1	169200425	169200769
chr1	169214528	169215301
chr1	169218988	169219549
chr1	169219961	169220422
chr1	169322830	169323274
chr1	169323293	169323608
chr1	169528411	169528808
chr1	169574955	169575359
chr1	169845048	169845575
chr1	169899744	169899961
chr1	169946487	169947048
chr1	170127738	170128081
chr1	170164384	170164936
chr1	170347201	170347610
chr1	170431946	170432315
chr1	170436553	170436865
chr1	170514270	170514712
chr1	170562544	170562849
chr1	170673456	170674026
chr1	171029382	171029674
chr1	171194008	171194510
chr1	171315866	171316265
chr1	171346865	171347233
chr1	171436571	171436850
chr1	171938510	171938860
chr1	171989374	171989926
chr1	172041754	172042760
chr1	172104973	172105298
chr1	172519810	172520190
chr1	172562462	172562913
chr1	172574367	172574779
chr1	172585368	172586570
chr1	172586838	172587740
chr1	172588027	172588433
chr1	172595328	172595839
chr1	172630791	172631117
chr1	172632332	172632881
chr1	172661794	172662025
chr1	172721156	172721499
chr1	172797524	172797847
chr1	172815348	172815655
chr1	172949068	172950295
chr1	172994563	172994920
chr1	173024597	173024960
chr1	173180067	173180494
chr1	173211303	173211617
chr1	173217625	173218227
chr1	173275713	173276020
chr1	173305799	173306284
chr1	173342116	173342482
chr1	173346798	173347162
chr1	173367381	173367786
chr1	173433392	173434158
chr1	173957086	173957755
chr1	174063415	174064191
chr1	174070340	174070711
chr1	174084766	174085115
chr1	174173808	174174088
chr1	174219365	174219888
chr1	174236067	174236628
chr1	174242108	174242563
chr1	174245206	174245435
chr1	174306410	174306813
chr1	174432525	174433029
chr1	174433683	174434130
chr1	174437167	174437442
chr1	174493028	174493519
chr1	174562672	174563187
chr1	174890547	174890903
chr1	176576138	176576407
chr1	177603704	177604279
chr1	177622820	177623145
chr1	178744101	178744541
chr1	178748819	178749261
chr1	178752146	178752494
chr1	178757644	178757999
chr1	178765033	178765420
chr1	178775744	178776136
chr1	178879519	178879817
chr1	178880185	178880710
chr1	178938897	178939429
chr1	178941676	178942399
chr1	178944339	178945490
chr1	179080685	179080980
chr1	179371499	179372392
chr1	179374561	179374976
chr1	179375603	179375999
chr1	179485607	179486163
chr1	179553335	179553837
chr1	179564347	179564727
chr1	179572893	179573502
chr1	179576225	179576722
chr1	179638511	179639072
chr1	179641530	179641837
chr1	179726263	179726912
chr1	179727538	179728187
chr1	179913249	179913792
chr1	180117497	180118040
chr1	180266558	180267076
chr1	180298986	180299400
chr1	180336417	180336724
chr1	180457696	180458632
chr1	180472598	180472906
chr1	180888402	180888716
chr1	180930206	180930618
chr1	180972003	180972730
chr1	180974365	180974693
chr1	180984529	180984870
chr1	181151162	181151465
chr1	181168807	181169123
chr1	181388781	181389117
chr1	181476328	181476954
chr1	181515673	181516194
chr1	181539958	181540341
chr1	181774903	181775444
chr1	181793476	181793825
chr1	181882355	181882666
chr1	181890466	181890766
chr1	182028603	182028936
chr1	182102056	182102566
chr1	182130922	182131289
chr1	182140801	182141150
chr1	182214170	182214565
chr1	182214666	182215047
chr1	182242771	182243505
chr1	182364336	182364674
chr1	182392579	182393072
chr1	182440453	182440946
chr1	182476965	182477303
chr1	182626682	182627248
chr1	182655767	182656393
chr1	182707397	182707715
chr1	182707877	182708565
chr1	182743886	182744580
chr1	182778803	182779264
chr1	182780784	182781499
chr1	182834125	182834437
chr1	182843913	182844443
chr1	182865137	182865527
chr1	182874740	182875199
chr1	182875727	182876130
chr1	182939968	182940347
chr1	183074127	183074548
chr1	183141969	183142314
chr1	183162545	183163136
chr1	183186479	183186855
chr1	183204028	183204342
chr1	183265634	183265894
chr1	183282455	183282968
chr1	183325212	183325977
chr1	183442883	183443238
chr1	183480039	183480526
chr1	183481031	183481379
chr1	183482649	183483553
chr1	183807109	183807430
chr1	183818992	183819371
chr1	183923756	183924141
chr1	183949809	183950507
chr1	183958534	183958826
chr1	183983117	183983428
chr1	183985314	183985688
chr1	183998185	183998495
chr1	184004391	184004668
chr1	184029218	184029564
chr1	184054495	184054958
chr1	184180829	184181170
chr1	184271638	184272026
chr1	184298421	184298733
chr1	184391446	184391856
chr1	184419848	184420461
chr1	184429680	184430024
chr1	184431981	184432476
chr1	184436414	184437072
chr1	184445379	184445902
chr1	184450085	184451191
chr1	184458100	184458737
chr1	184472477	184472927
chr1	184473222	184473594
chr1	184539344	184539665
chr1	184550613	184551146
chr1	184610197	184610498
chr1	184695062	184695402
chr1	184722787	184723189
chr1	184812841	184813090
chr1	184838483	184839063
chr1	184913177	184913546
chr1	185467679	185467985
chr1	185493480	185493813
chr1	185692828	185693458
chr1	185728495	185728872
chr1	185728891	185729895
chr1	185811602	185812109
chr1	185857524	185857924
chr1	185883722	185884086
chr1	185890011	185890301
chr1	185930730	185931113
chr1	185956114	185956588
chr1	185962589	185962928
chr1	185994812	185995189
chr1	186084964	186085605
chr1	186133258	186133719
chr1	186207869	186208409
chr1	186304846	186305339
chr1	186343417	186343724
chr1	186400256	186400746
chr1	186487237	186488014
chr1	186499209	186500134
chr1	186531453	186532271
chr1	186532479	186533266
chr1	186606043	186606721
chr1	186669251	186669990
chr1	186710075	186710527
chr1	186732463	186732830
chr1	186746690	186747304
chr1	186861907	186862246
chr1	186937600	186937970
chr1	187017246	187017688
chr1	187053629	187054306
chr1	187155778	187156300
chr1	187200317	187200667
chr1	187274960	187275327
chr1	187710776	187711237
chr1	187958337	187958678
chr1	188013331	188013731
chr1	188020921	188021384
chr1	188074219	188074645
chr1	188137988	188138375
chr1	188167015	188167322
chr1	188223511	188224042
chr1	188231542	188232144
chr1	188266062	188266498
chr1	188272612	188272939
chr1	188280930	188281325
chr1	188406091	188406447
chr1	188409479	188409857
chr1	188411227	188411631
chr1	188482656	188482983
chr1	188529098	188529409
chr1	188539109	188539635
chr1	188563686	188564037
chr1	188573073	188573571
chr1	188839928	188840277
chr1	188924540	188924914
chr1	189058432	189058753
chr1	189067692	189067999
chr1	189118311	189118772
chr1	189118883	189119295
chr1	190213983	190214350
chr1	190390217	190390591
chr1	191056772	191057040
chr1	191542414	191543033
chr1	191543331	191543778
chr1	191551720	191552148
chr1	191611042	191611353
chr1	191624077	191624839
chr1	191699837	191700460
chr1	191706807	191707144
chr1	191748105	191748403
chr1	191985143	191985761
chr1	192514510	192514901
chr1	192597495	192597861
chr1	192723069	192723336
chr1	192735413	192735865
chr1	192796331	192797298
chr1	192801044	192801363
chr1	192878772	192879088
chr1	192926764	192927214
chr1	192950048	192950536
chr1	193007030	193007891
chr1	193039855	193040254
chr1	193041810	193042085
chr1	193048635	193048962
chr1	193078290	193078757
chr1	193106604	193107480
chr1	193116065	193116666
chr1	193123127	193123809
chr1	193141641	193141949
chr1	193149861	193150199
chr1	193220489	193221406
chr1	193259173	193259673
chr1	193345302	193345659
chr1	193352184	193352506
chr1	193381046	193381380
chr1	193399780	193400111
chr1	193484945	193485391
chr1	193485790	193486630
chr1	193645132	193645656
chr1	193679427	193680098
chr1	193731302	193731811
chr1	193739450	193739836
chr1	193805331	193805691
chr1	193885519	193886183
chr1	193894072	193895124
chr1	193916315	193916631
chr1	193960329	193960959
chr1	194378936	194379286
chr1	194467272	194467600
chr1	194562622	194563104
chr1	194571847	194572138
chr1	194604417	194604775
chr1	194605213	194605616
chr1	194615183	194615764
chr1	194618226	194618646
chr1	194624987	194625395
chr1	194632590	194633512
chr1	194666815	194667408
chr1	194667610	194667992
chr1	194680593	194681393
chr1	194695999	194696377
chr1	194956297	194956723
chr1	194995465	194995823
chr1	195000381	195000750
chr1	195015416	195015982
chr1	195024087	195024411
chr1	195042218	195042637
chr1	195099120	195099463
chr1	195116824	195117344
chr1	195127454	195127796
chr1	195127935	195128333
chr1	195143156	195143736
chr1	195164402	195165180
chr1	195168527	195169078
chr1	195171054	195171650
chr1	195172964	195173479
chr1	195207883	195208832
chr1	195215795	195216150
chr1	195225067	195225743
chr1	195226304	195226998
chr1	195233712	195234032
chr1	195238880	195239182
chr1	195239317	195239641
chr1	195348075	195348626
chr1	195402338	195402661
chr1	195525094	195525424
chr1	196049255	196049567
chr1	196445501	196446331
chr1	196446660	196447048
chr1	196448828	196449553
chr1	196484595	196485108
chr1	196508285	196508605
chr1	196514016	196514374
chr1	196514809	196515149
chr1	196705820	196706284
chr1	196802478	196803333
chr1	196853685	196854090
chr1	196957040	196957371
chr2	3035962	3036323
chr2	3075203	3075737
chr2	3089101	3089407
chr2	3201135	3202106
chr2	3336103	3336477
chr2	3341054	3341755
chr2	3392215	3392470
chr2	3463917	3464219
chr2	3538778	3539368
chr2	3558359	3558690
chr2	3600885	3601604
chr2	3634474	3634806
chr2	4249158	4249467
chr2	4283544	4283878
chr2	4285999	4286410
chr2	4344943	4345251
chr2	4365805	4366117
chr2	4366531	4367216
chr2	4398420	4398751
chr2	4425431	4425903
chr2	4438570	4439023
chr2	4462802	4463243
chr2	4478033	4478433
chr2	4984770	4985264
chr2	5087762	5088293
chr2	5209666	5210080
chr2	5218319	5218765
chr2	5273744	5274495
chr2	5301852	5302491
chr2	5420672	5420979
chr2	5534770	5535286
chr2	5558036	5558407
chr2	5765826	5766145
chr2	5816167	5816636
chr2	6018440	6018779
chr2	6050875	6051396
chr2	6133735	6134106
chr2	6215223	6215555
chr2	6254578	6255107
chr2	6269952	6270839
chr2	6271034	6271577
chr2	6273659	6273948
chr2	6287513	6287869
chr2	6300722	6301300
chr2	6404689	6405025
chr2	6642094	6642506
chr2	6793169	6793983
chr2	6797635	6798649
chr2	6923039	6923403
chr2	6962062	6962318
chr2	7010134	7010545
chr2	7011552	7011949
chr2	7036187	7036568
chr2	7036946	7037180
chr2	7455853	7456194
chr2	8703174	8703520
chr2	8739804	8740157
chr2	9386492	9386871
chr2	9515455	9516035
chr2	9679619	9680129
chr2	9800049	9800464
chr2	9800728	9801422
chr2	9891828	9892235
chr2	9917790	9918118
chr2	9970057	9970578
chr2	10001977	10002352
chr2	10187523	10187946
chr2	10705896	10706263
chr2	10938126	10938395
chr2	11261159	11261485
chr2	11312386	11312698
chr2	11347114	11347764
chr2	11351210	11351660
chr2	11451658	11452159
chr2	11456961	11457494
chr2	11626736	11627033
chr2	11699654	11700027
chr2	12238062	12238399
chr2	12247033	12247612
chr2	12250787	12251090
chr2	12618885	12619165
chr2	12620888	12621294
chr2	13192610	13193232
chr2	13219282	13219858
chr2	13293780	13294482
chr2	13331399	13332117
chr2	13334986	13335392
chr2	13372105	13372458
chr2	13424407	13424728
chr2	13984459	13984798
chr2	14058458	14059227
chr2	14166448	14166792
chr2	14970821	14971143
chr2	14976756	14977252
chr2	16272763	16273074
chr2	16405491	16406052
chr2	16659820	16660274
chr2	17312945	17313412
chr2	17762767	17763051
chr2	17906260	17906602
chr2	17926838	17927139
chr2	17948058	17948438
chr2	18313839	18314758
chr2	18686497	18686856
chr2	18715935	18716284
chr2	18761010	18761655
chr2	18817537	18818135
chr2	18819545	18819909
chr2	18842281	18842617
chr2	18886779	18887117
chr2	18919501	18920163
chr2	19475571	19475908
chr2	19523035	19523365
chr2	19579200	19579828
chr2	19637538	19637871
chr2	20564438	20564992
chr2	20815734	20816116
chr2	20844167	20844545
chr2	20860935	20861207
chr2	20867051	20867622
chr2	20890699	20891350
chr2	20893277	20893595
chr2	21127410	21127752
chr2	21158609	21158960
chr2	21175939	21176232
chr2	21215650	21215983
chr2	22750894	22751563
chr2	22894697	22895354
chr2	23011300	23011652
chr2	23011851	23012262
chr2	23838536	23839316
chr2	23903941	23904291
chr2	23943673	23943993
chr2	24208560	24209006
chr2	24362968	24363336
chr2	24464197	24464523
chr2	24539723	24540105
chr2	24598396	24598769
chr2	24618538	24618887
chr2	24774781	24775435
chr2	24790780	24791453
chr2	24805480	24805806
chr2	24830605	24830991
chr2	24831237	24831558
chr2	24890589	24890975
chr2	24966420	24966764
chr2	24971075	24971450
chr2	25000785	25001131
chr2	25028193	25028586
chr2	25036393	25036899
chr2	25051995	25052395
chr2	25079757	25080311
chr2	25080423	25080803
chr2	25082325	25082711
chr2	25110653	25111130
chr2	25118220	25118652
chr2	25127550	25128188
chr2	25147784	25148160
chr2	25174233	25174981
chr2	25216191	25216548
chr2	25219012	25219444
chr2	25220773	25221354
chr2	25258641	25259001
chr2	25283844	25284500
chr2	25287829	25288227
chr2	25315939	25316715
chr2	25321184	25321612
chr2	25389203	25389575
chr2	25389789	25390123
chr2	25404911	25405606
chr2	25406742	25407084
chr2	25413212	25413884
chr2	25436682	25437438
chr2	25463271	25463913
chr2	25516716	25517226
chr2	25653125	25653491
chr2	25697487	25698070
chr2	25838459	25839136
chr2	25876306	25876601
chr2	25910455	25910969
chr2	25947061	25947725
chr2	25974169	25974448
chr2	25988354	25988743
chr2	25995085	25995796
chr2	25999795	26000287
chr2	26046861	26047143
chr2	26047702	26048007
chr2	26085837	26086133
chr2	26150032	26150424
chr2	26153911	26154395
chr2	26161068	26161461
chr2	26197655	26198040
chr2	26207487	26208499
chr2	26244570	26245076
chr2	26264349	26264949
chr2	26293897	26294328
chr2	26300549	26300933
chr2	26340640	26341175
chr2	26343219	26343603
chr2	26357654	26358210
chr2	26358870	26359328
chr2	26381153	26381628
chr2	26385472	26385806
chr2	26387265	26387993
chr2	26388704	26389317
chr2	26390045	26390876
chr2	26397062	26397456
chr2	26399156	26399764
chr2	26428797	26429375
chr2	26449250	26449643
chr2	26495961	26496323
chr2	26758255	26758742
chr2	26788681	26789407
chr2	26865138	26865799
chr2	26873303	26873707
chr2	26924988	26926013
chr2	26927490	26927908
chr2	26931021	26931476
chr2	26934545	26934969
chr2	27102635	27103028
chr2	27166362	27166683
chr2	27171737	27172091
chr2	27182555	27182876
chr2	27183969	27184464
chr2	27269507	27270487
chr2	27272119	27272480
chr2	27274268	27274779
chr2	27291794	27292334
chr2	27297827	27298166
chr2	27326568	27327226
chr2	27360961	27361446
chr2	27395647	27396165
chr2	27532095	27532780
chr2	27535529	27536113
chr2	27552939	27553264
chr2	27555074	27555569
chr2	27595804	27596174
chr2	27617276	27617613
chr2	27623153	27623521
chr2	27627427	27627807
chr2	27629291	27630521
chr2	27631102	27631679
chr2	27641345	27641854
chr2	27654662	27654997
chr2	27657892	27658615
chr2	27683084	27683483
chr2	27690832	27691909
chr2	27698410	27698805
chr2	27700378	27700851
chr2	27714009	27714410
chr2	27730192	27730554
chr2	27741639	27742142
chr2	27744721	27745134
chr2	27750517	27751010
chr2	27790950	27791301
chr2	27809351	27809690
chr2	27902699	27902993
chr2	27964412	27964709
chr2	27989907	27990537
chr2	27994067	27994479
chr2	28027489	28027863
chr2	28061537	28061987
chr2	28080405	28080736
chr2	28083089	28083816
chr2	28083819	28084330
chr2	28096480	28096803
chr2	28099746	28100672
chr2	28101486	28102360
chr2	28149985	28150321
chr2	28155803	28156098
chr2	28379082	28379772
chr2	28380137	28380476
chr2	28380771	28381728
chr2	28383572	28383961
chr2	28388776	28389386
chr2	28394291	28394645
chr2	28394765	28395249
chr2	28496617	28497005
chr2	28566656	28566973
chr2	28666147	28666520
chr2	28738206	28738853
chr2	28761229	28761595
chr2	28763960	28764320
chr2	28801640	28802572
chr2	28821884	28822407
chr2	28823804	28824162
chr2	28915558	28916053
chr2	28980373	28981049
chr2	29050155	29050566
chr2	29053779	29054340
chr2	29100577	29101624
chr2	29202007	29202734
chr2	29214653	29215004
chr2	29258120	29258654
chr2	29278127	29278927
chr2	29282704	29283065
chr2	29297810	29298310
chr2	29308339	29308888
chr2	29320182	29320485
chr2	29419448	29419943
chr2	29437920	29438253
chr2	29448373	29448664
chr2	29475027	29475497
chr2	29480097	29480880
chr2	29488627	29488916
chr2	29503496	29503846
chr2	29523570	29523943
chr2	29557695	29558131
chr2	29566555	29566889
chr2	29572314	29572789
chr2	29587116	29587507
chr2	29658041	29658414
chr2	29744935	29745275
chr2	29745799	29746418
chr2	29819911	29820223
chr2	29820673	29821664
chr2	29866320	29866645
chr2	29888485	29889087
chr2	29922796	29923168
chr2	29949031	29949481
chr2	29989105	29989558
chr2	30026883	30027572
chr2	30033783	30034127
chr2	30121428	30121710
chr2	30141647	30142108
chr2	30214564	30215093
chr2	30219298	30219667
chr2	30270981	30271981
chr2	30296731	30297036
chr2	30300872	30301279
chr2	30312121	30312420
chr2	30319289	30319703
chr2	30328977	30329388
chr2	30343091	30343506
chr2	30403310	30403627
chr2	30409265	30409607
chr2	30413618	30413964
chr2	30418039	30418455
chr2	30469013	30469503
chr2	30483874	30484216
chr2	30498336	30498840
chr2	30498964	30499314
chr2	30513742	30514608
chr2	30547657	30548009
chr2	30563617	30564169
chr2	30564795	30565120
chr2	30567374	30568066
chr2	30571937	30572336
chr2	30572833	30573186
chr2	30574536	30574853
chr2	30575359	30576084
chr2	30589348	30589743
chr2	30598694	30599281
chr2	30621982	30622335
chr2	30627086	30627567
chr2	30629191	30629601
chr2	30678653	30679273
chr2	30682837	30683212
chr2	30705820	30706706
chr2	30720408	30720815
chr2	30746439	30746931
chr2	30752650	30753166
chr2	30773221	30773605
chr2	30774102	30774503
chr2	30780729	30781126
chr2	30783338	30783678
chr2	30783727	30784261
chr2	30798273	30798648
chr2	30837366	30838167
chr2	30840823	30841343
chr2	30869004	30869414
chr2	31007670	31008180
chr2	31101674	31102138
chr2	31114226	31114690
chr2	31155242	31155797
chr2	31222814	31223131
chr2	31236661	31237002
chr2	31297947	31298398
chr2	31304849	31305713
chr2	31325189	31326009
chr2	31382151	31382546
chr2	31392564	31393044
chr2	31427724	31428456
chr2	31495452	31495972
chr2	31615168	31615642
chr2	31659080	31659403
chr2	31666867	31667559
chr2	31670790	31671226
chr2	31678297	31678580
chr2	31692530	31693092
chr2	31718450	31718778
chr2	31722163	31722423
chr2	31757191	31757558
chr2	31780344	31781006
chr2	31790509	31791090
chr2	31803766	31804640
chr2	31805601	31805995
chr2	31807463	31808661
chr2	31920490	31920830
chr2	31950907	31951321
chr2	32022635	32023804
chr2	32029373	32031019
chr2	32074039	32074470
chr2	32091978	32092353
chr2	32115197	32115524
chr2	32171185	32171490
[truncated: 21,274 more rows]

## Sheet: myod_predicted_CAO_overlap_mm9
Overlapped regions from MYOD1 predicted regions and CAO et al. myotube and fibroblasts (mm9)
Chromosome	Start position	End position
chr1	36592553	36593487
chr1	40861810	40862600
chr1	66997377	66997974
chr1	66997974	67000789
chr1	67003711	67004713
chr1	75355955	75356992
chr1	137690881	137691931
chr1	137948721	137949477
chr10	17515289	17517822
chr10	51749225	51750039
chr10	80391453	80393060
chr10	88067670	88068427
chr10	126938579	126939253
chr10	127472313	127473546
chr11	5703691	5703983
chr11	12358379	12358788
chr11	12358788	12359453
chr11	12363438	12364684
chr11	66978450	66979267
chr11	82724061	82725181
chr11	107575807	107576290
chr11	107577705	107579160
chr11	117829544	117831279
chr11	117835701	117836604
chr11	117836678	117837893
chr12	85261309	85263594
chr12	86941489	86942893
chr12	86943022	86944220
chr12	86945614	86945976
chr12	104576453	104578502
chr13	12429889	12431097
chr13	32868079	32869330
chr13	32870376	32871237
chr13	62959657	62960295
chr13	98009937	98010959
chr14	21483703	21484384
chr14	32021564	32022988
chr14	35401655	35402416
chr14	51515748	51517148
chr15	76852643	76852918
chr15	76853013	76853993
chr15	76856341	76857069
chr15	76857809	76859615
chr16	4512630	4514451
chr16	4519992	4520379
chr16	4521405	4522300
chr16	4523053	4523693
chr16	4537319	4537413
chr16	4537760	4538819
chr17	34161311	34163153
chr17	44913389	44915061
chr17	56722494	56723696
chr19	4876333	4877235
chr19	11892079	11893181
chr19	31836633	31839046
chr19	36194271	36195046
chr19	36203468	36204102
chr2	52190552	52191784
chr2	73417214	73418301
chr2	73418344	73419349
chr2	84485267	84486337
chr2	84486933	84487692
chr2	84566659	84567903
chr2	84573592	84576100
chr2	113878202	113880253
chr2	113882963	113883972
chr2	113885634	113886374
chr2	121239075	121239774
chr2	148698666	148700888
chr2	152729002	152729715
chr2	152730406	152730956
chr2	152730956	152732066
chr2	152736587	152737283
chr2	163212228	163213217
chr2	164601998	164602801
chr2	164604135	164605162
chr2	164606681	164607701
chr3	101889415	101890561
chr3	102877546	102877922
chr3	108023632	108023968
chr3	116265022	116266452
chr3	116669817	116670912
chr4	3501460	3502172
chr4	6293101	6294021
chr4	33118591	33119591
chr4	43534323	43534805
chr4	43534805	43535546
chr4	43536226	43537914
chr4	43542851	43543583
chr4	108504499	108507364
chr4	108507461	108508585
chr4	129373962	129375749
chr4	135314828	135315074
chr4	135315587	135317129
chr4	135317517	135318434
chr4	135321616	135322220
chr4	135322930	135323415
chr4	135695728	135697178
chr4	135700268	135703049
chr4	140971210	140972613
chr4	140975853	140977672
chr4	140978662	140979679
chr5	93026580	93028545
chr5	139229836	139231589
chr5	147655164	147656792
chr6	24536642	24537438
chr6	24541634	24542129
chr6	24547102	24547882
chr6	24549593	24550168
chr6	47761825	47763215
chr6	47763303	47764388
chr6	71212198	71212775
chr6	71212775	71213202
chr6	88577231	88577963
chr6	97202571	97203394
chr6	97209948	97210331
chr6	97428444	97429414
chr6	112409237	112409805
chr7	4915169	4916314
chr7	19994719	19997498
chr7	29908592	29909983
chr7	31758326	31759559
chr7	51779959	51781031
chr7	52253080	52254082
chr7	53621232	53621523
chr7	53626449	53626985
chr7	107613877	107614687
chr7	107617679	107618489
chr7	107641198	107642740
chr7	133602016	133603012
chr7	133604315	133605618
chr7	133606436	133608124
chr7	133608523	133609770
chr7	135146963	135147997
chr7	135148387	135149693
chr7	135349809	135350024
chr7	149626768	149628395
chr7	149681403	149682611
chr7	149683803	149685385
chr7	149685430	149686833
chr8	15056894	15057941
chr8	55633365	55634312
chr8	55634842	55635797
chr8	109959874	109961438
chr8	110069736	110070456
chr8	125780765	125781380
chr8	126417597	126420114
chr9	44187297	44188602
chr9	58155725	58156636
chr9	58157675	58158561
chr9	58164487	58165455
chr9	119930844	119933606
